# Supplementary material
Source: publisher figshare collection journal article supplement (https://gsajournals.figshare.com/ndownloader/files/27678696)
Supplement: Supplementary file 1 [file 27678696]

## Sheet: Increased Func. + Localiz. CA6
Supplemental File S9
CA6 increased annotated Brachypodium PM protein dataset
																			NA					CA 2 days					CA 4 days					CA 6 days					CA 8 days
Bradi no.	Anova (p)	Adjusted (p)	Dunnet's (CA2)	Dunnet's (CA4)	Dunnet's (CA6)	Dunnet's (CA8)	Max fold change (/NA)	Min fold change (/NA)	Fold change (CA2/NA)	Fold change (CA4/NA)	Fold change (CA6/NA)	Fold change (CA8/NA)	Peptide Sequence	Description	Species	Category	PM Prediction (Y/N)	Predicted Localization	Experiment1	Experiment2	Experiment3	Experiment4	Average	Experiment1	Experiment2	Experiment3	Experiment4	Average	Experiment1	Experiment2	Experiment3	Experiment4	Average	Experiment1	Experiment2	Experiment3	Experiment4	Average	Experiment1	Experiment2	Experiment3	Experiment4	Average
Bradi1g00700.1	0.000930051	0.00196961	0.62839	0.111106	0.0430104	0.354177	1.59902	0.508909	0.757856	0.508909	1.59902	1.33918	MARPQLEVLSKLDAAKTQWYHFTAIVIAGMGFFTDAYDLFCISLVTKLLGRIYYHIDGSPTPGSLPPNVAAAVNGVAFCGTLSGQLFFGWLGDKMGRKKVYGMTLMCMVLCSIASGLSFGQTPTSVMATLCFFRFWLGFGIGGDYPLSATIMSEYANKKTRGAFIAAVFAMQGFGILTGGVVTLVISSAFRAAFDAPAYKDGAMASTPPQADYVWRIILMFGAIPALMTYYWRMKMPETARYTALVAKNAKQAAADMSKVLQVEIGAEEDNNKAGGAVEENRNSFGLFSAEFLRRHGLHLLGTATCWFLLDIAFYSQNLFQKDIFTAINWIPKANTMSALEEVYRIARAQTLIALCGTVPGYWFTVALIDRIGRFWIQLGGFFFMTVFMLCLAAPYHHW…	probable inorganic phosphate transporter 1-4-like	Brachypodium distachyon	transporter	Y	PM	50253.2	28664.2	58045.6	66055.7	50754.7	24915.3	41453.8	40303.2	47186.6	38464.7	27600.5	33916.6	19807.3	21993.7	25829.5	117385	61492.2	82439.9	63314.7	81157.9	52170.6	71445.8	75978.9	72284.1	67969.8
Bradi1g01580.1	4.11716e-09	1.23423e-07	0.999992	1	2.56425e-08	2.59924e-05	64.8131	1.02231	1.3322	1.02231	64.8131	58.9524	MAAAAVLRNAGTRRVLAYPTFRAAVISGPAALPDASAAAGTQTAPPAFAAGGGLWARSMATFTRTKPHVNVGTIGHVDHGKTTLTAAITKVLAEAGSAKAVAFDEIDKAPEEKARGITISTAHVEYETAKRHYAHVDCPGHADYVKNMITGAAQMDGGILVVSAPDGPMPQTKEHILLARQVGVPSLVCFLNKVDAVDDPELLELVEMELRELLSFYKFPGDDIPIIRGSALSALQGTNDEIGKNAILKLMDAVDEYIPDPVRVLDKHFLMPIEDVFSIQGRGTVVTGRVEQGTIKTGEDVEILGLSETGPLKTTVTGVEMFKKILNHGEAGDNVGLLLRGLKRGDVQRGQVVCKPGSVKTYKKFEAEIYVLTKDEGGRHTAFFSNYRPQFYFRTADIT…	Elongation factor Tu	Brachypodium distachyon	protein synthesis	N	nucleus	1046.88	1131.1	289.293	240.969	677.06	458.943	841.505	1663.69	643.793	901.983	197.673	334.667	1309.5	926.819	692.165	49350	29454.6	43762.6	52962.3	43882.4	33405.8	35651.8	50679.4	39920.3	39914.3
Bradi1g01920.1	0.00938146	0.0147501	0.894923	0.727443	0.0402338	0.12259	1.83469	0.711065	1.20248	0.711065	1.83469	1.65936	MATAAATVTTFLLLVVSVAGAMAATKAPSSFRTVYAFGDSFTDTGNTRSTTGPYSFGYVSSLPYGATFFHRPTNRYSDGRLVVDFLADHLRLPSFLPPYLPNSSPNSNSSDKSSSSNKSGAVGVNFAVAGATAIEHDFFVRNNLTVDITPQSIMTELAWLDKHLAAAEKKKKAGKGAGKKKDLEEEEGIGEALFWVGEIGANDYAYSFMAADTVSPKNIQAMAVARVASFVEELLKRGAKYIVVQGLPLTGCLPLAMTLARQEDRDNISCVASVNQQSYDHNRLLQADLNRLRQKHPGASIAYADYYAAHLAVMRSPARHGFTEPFKTCCGTGGGAYNFEIFSTCGSPEVATACAQPAKYVNWDGVHMTEAMYKVVAGMFFEDNSGKYCRPAFSSLLTK…	GDSL esterase/lipase At3g48460-like	Brachypodium distachyon	metabolism	Y	PM	19338	24646.1	18225.5	12233.2	18610.7	9355.11	11917.9	30994.5	37248.9	22379.1	15528.3	13026.4	12114.5	12264.5	13233.4	36841.8	26821.9	39189.5	33726.6	34145	23664.5	26071.5	35441.4	38349.9	30881.8
Bradi1g03760.1	1.76065e-07	2.01282e-06	1.2728e-06	6.12862e-08	2.75984e-06	1.1188e-05	14.0802	9.1758	10.3213	14.0802	10.1951	9.1758	MANATSGVSVAEECVKAFQELRTGRAHRFVVYKVNNTDADESAAEQVVVDKVGGRDAAFEDLVAALPADDCRYAVYDLDFTVAAATAAHADGEAPRSKIFFISWSPETAEVRSKMVYASSNEGFKKELDGTQIDVQATDPSELTLQILKDLAA	actin-depolymerizing factor 3-like	Brachypodium distachyon	cell structure	N	extracellular matrix	8899.02	10361.3	11054.2	11025.3	10335	105551	129973	91988.2	99166.9	106670	110491	172817	135815	162949	145518	99703.3	117018	91549.6	113193	105366	76626.1	104419	91017.8	107263	94831.6
Bradi1g04337.1	0.000502173	0.00115051	0.99985	0.0705447	0.0296975	0.000411948	1.94606	1.02123	1.02123	1.46296	1.5443	1.94606	MDGQLRVIPWYEPARDKIAHSPTHAVHYRWVELILIKPRHHPRNHTHTDAKGREINQRRRTERRAQLVAPGRPSHGAQYAPPSASDDEGDAADDAPGVVRDQQDQEEEDELLLITAPSSSSALAVRDVEVRDIHPLTTPPTRAGSAYAASTAWDTASSSHRSVASSEGQFMTMSREFTAMVAAGAGAGAGAGANHNNPNPNPGGAAYDAHADPLASIGEDELEEEHNPLAIVPDSGRPIAAGSSSRSSGRGAARLDLEVVPAAAGPPVEARQVRKEEVETKVTAWQTAEIAQINNRFKREEVVINGWETEQLDKASAWLKKIERKLDEQRAKAVEKTQNDVAKARRKAEERRASAEAKRGLKLAKVLELANFMKAVGRVPTKRSFF	remorin 4.1-like	Brachypodium distachyon	signal transduciton	Y	PM	59306.3	58366.2	82214.2	75189.9	68769.2	79478.8	93766.9	54287.8	53383.2	70229.2	97815	119952	87281.9	97377	100606	89125.4	90478.1	128189	117008	106200	108522	125549	158151	143092	133829
Bradi1g05070.1	2.87945e-11	6.47397e-09	0.779505	0.467021	3.70689e-11	1.22889e-11	6.53268	0.489189	0.667822	0.489189	6.53268	5.31266	MAAAQLLGEDGRGYELARRLEACGAWRAWLGDGAHASLAQHLASPSTWDAFLSPASSSTSSNSAAPPRQLLLLQLRVRALLFDKASAALIPRNGASPAGPHSVNASYLQLHGDDIYFSLEDEQEDTAQHQMQSGTAFSPSRESVMLSQRNMRQDELPGSWYKQYAEKFRTRHGKYRSDDKEIPKRTPEGMSNYLKACSVHKRKRIVFMDDRSPNMMLENGPSLQSKVAGEFSNLADDTFIPEIRFPSDCVPESAVPRESGISRSNKIEVNGVLDNLPAPVSRNTAMLERFGMMPEYYKTGNKYRGKIGSKVEGKTLSQEQALLITRKLVARYLANAGFESGTAVAVDVLSEIIIKHISKLGRNLKLLSDSYRKQFSSIELLRMFLQTVGYSNIGPLMEI…	transcription factor SPT20	Brachypodium distachyon	unclassified	N	nucleus	19468.5	18083.9	21470.2	16817.3	18960	12588.2	12476.1	12209.9	13373.4	12661.9	8345.51	11241.7	8135.16	9377.7	9275.02	125607	103642	118692	147497	123860	93170.3	97288.5	118905	93548.6	100728
Bradi1g05180.1	3.77152e-05	0.000128731	0.886687	0.560023	0.000578435	7.89716e-05	2.83731	1.21287	1.21287	1.37252	2.51285	2.83731	MASNGAGKKTPPPASASSSSSTLRNSMTLQFARQVVTGRWFMVFACLLILSASGATYIFGIYSKELKSTLGYDQRTLNTLSFFKDLGANVGVLSGLINEVTPPWVVLSMGAAMNLAGYLMIYLAIDGKTRRPPVWLMCIYICVGANSQSFTNTGALVTCVKNFPESRGVVLGLLKGFVGLSGAIFTQLYIAIYGDDAKSLVLLVAWLPAAVSIVFVHTVRIMPYRVRGDRGENASGIGTGTDSGGSDPFFCFLYISMALAAYLLVMIVVQNQVDFSHAAYSVSAAALLLILFLPLAVVIKQEFRAKQELEAALLLPPTVTVDKPSSPSPPATAALQMAEPKTELSASPPQTSSSSSCSGSCLKHMFNPPAQGEDYTILQALVSVDMIVLFLATICGVGG…	major facilitor superfamily transporter domain-containing protein	Brachypodium distachyon	transporter	Y	PM	7924.39	3167.32	2397.84	3649.45	4284.75	6817.27	3589.18	5033.77	5347.17	5196.85	5456.46	5200.73	5161.72	7704.75	5880.92	9225.15	11759.9	11769.4	10313.3	10766.9	15527.7	10392.8	12202.1	10506.2	12157.2
Bradi1g06450.1	6.52079e-06	3.08651e-05	0.267463	0.00417909	1.46193e-05	6.37925e-06	2.39927	1.33741	1.33741	1.7558	2.30935	2.39927	MAGEKKGLTLLDFWVSPFGQRVRIALEEKALPYEYVEENLLAGKSELLLRSNPVHKKIPCLLHDGRPVNESLIIVQYLDEAFPDTRQLLPPHAAADPYARAQARFWADYVDKKVYDCGTRLWKLKGEPQVQAREEMKEILRTLEAELGEKEFFGGEHGFGFVDAAFAPFTAWFHSYEKFGEFSLEEVAPKLAAWAKRCGQRESVAKSLYSPEKVYEFIGVLKKKYGVE	probable glutathione S-transferase GSTU1-like	Brachypodium distachyon	disease/defence	N	cytosol	197006	228599	197219	188105	202732	289448	323222	238431	233444	271136	351423	371678	303121	397605	355957	481084	529279	399358	463000	468180	376165	465271	510826	593372	486409
Bradi1g06890.1	0.00148719	0.00300332	0.639806	0.955434	0.000686394	0.155127	5.73944	1.50597	2.07239	1.50597	5.73944	3.024	MAALAASIATSTAFASKPRLSSPTPRARLSVSCSATGDNNNNNPSLATAAKTFSAALALSSVLLSSAATFSPPPAAADIAGLTPCKDSKAFAKREKQSVKKLTSSLKKYAPDSAPALAIQATIEKTQRRFENYGKFGLLCGSDGLPHLIVSGDQRHWGEFVTPGVLFLYIAGWIGWVGRSYLIAVSGEKKPAMREIIIDVELAARIIPRGFIWPVAAYRELINGDLVVDDADIGY	photosystem I reaction center subunit III, chloroplastic-like	Brachypodium distachyon	energy	N	chloroplast	2248.96	892.835	274.994	2130.75	1386.88	1301.02	4862.96	3586.88	1745.81	2874.17	2654.51	2493.58	972.194	2234.13	2088.6	9110.11	10595.9	7271.01	4862.74	7959.94	3581.62	6826.44	643.996	5723.68	4193.93
Bradi1g07170.1	1.78303e-05	6.81389e-05	0.000656651	0.0719924	0.000469304	0.362646	1.61379	0.808315	1.59645	1.30922	1.61379	0.808315	MHPDATSPSHRIARVAAHLNPLTPPRPQMEEAGLRPVACRAKGAAPGFKVAVLGAAGGIGQSLSLLMKMNPLVSVLHLYDVVNTPGVTADVSHMDTTAVVRGFLGQQQLEAALTGMDLVIIPAGLPRKPGMTRDDLFNKNAGIVRSLCEGIAKCCPNAIVNLISNPVNSTVPVAAEVFKRAGTYCPKRLLGVTTLDVARANTFVAEVLGVDPRDVSVPVVGGHAGVTILPLLSQVSPPCSFTADEISYLTNRIQNGGTEVVEAKAGAGSATLSMAFAAAKFADACLRGMRGDAGIVECSYVASEVRELPFFATKVRLGRGGAEEILPLGPLNDFERAGLEMAKKELAESIQKGVAFMNK	Malate Dehydrogenase	Brachypodium distachyon	energy	N	multiple localizations	69309	74758.5	85067	103761	83223.8	112284	138395	152855	127915	132862	122506	120221	109109	83998.6	108959	137365	134171	132902	132787	134306	68613.5	86419.3	57171.9	56879.5	67271.1
Bradi1g09460.1	3.71867e-05	0.000128731	0.879956	0.0474299	0.00231861	0.0745083	1.55295	0.642544	0.906434	0.642544	1.55295	1.32669	MFGRDPWGGTLEISNADSATDDDRSRDLDRGALMRHQLDETQQSWLLAGPGDQAGKKKKKYVDIGCMVIDRKIFLWTVGTILGVGLFIGFVMMIVKLVPHKKPPPPPPDQYTQALHKALMFFNAQRSGPLPKHNGVSWRGNSGMKDGLSDSTARKSLVGGFYDAGDAIKFNFPMAWSMTMLSWTVIEYKAKYEAIGELDHVKEVIKWGTDYILKTFNSSADTIDRIVAQVGVGDTSKGPMPNDHYCWMRPEDIDYKRPVIECHSCSDLAAEMAAALASASIVFKDNKKYSDKLVHGAKALYKFGRLQRGRYSPNGSDQSLFYNSTSYWDEFVWGGAWMYFATGNTSYLTIATAPGMAKHAGAFWLGSPNYGVFTWDDKLPGSQVLLSRLRLFLSPGYPY…	Endoglucanase	Brachypodium distachyon	cell structure	Y	PM	79462.3	55605.9	88109.3	104849	82006.6	61082.5	89852.4	68713.6	77685.5	74333.5	48611.7	45610.7	52050.6	64498.3	52692.8	135190	103058	134459	136700	127352	111022	106630	127122	90414.8	108797
Bradi1g10530.1	1.37159e-06	9.63684e-06	0.996469	0.269425	8.6789e-08	0.000769779	15.8617	1.4551	1.4551	4.07521	15.8617	9.276	MAENIDLVLDFLRKNRFAKAEAALIGELSGLGDVNRSATQRRATEPKEDDEQEDSEVGSTAGPRGAASVRSADSSREFIVKEIDVGGLPNGSDEKKGLGIGLPQDNNTGDLYPWNFSIANSTVEQLAELLVSEEVPRHRRGALVAEKRDRGVGTEQPGPVLEQKVSFGRGKGKVELARRSEISEPAHSSDKNLVPEKEEPLNGYAVKTVLPFPTEIPSSSYHSTHHDVNERKETKKSIGADGAGKAAKRQPDEGNRQYYSEKSQNNVDQISDRCFDLQLMGNNQREEFPKLPPVRLKSEDKLVNMNWEEKIDHHESGTNDPSADHVFMIGSYLNVPIGQDITSSGGRRTIGGNSWLSVSQGIAEDTSDMIFRTMGDDFEYPNNEYWDSDEYDDDDDVGY…	serine/threonine protein kinase unclassified	Brachypodium distachyon	signal transduciton	Y	PM	7.41596	208.388	599.871	637.803	363.369	338.494	545.134	342.128	889.196	528.738	2006.6	1407.82	1804.16	704.65	1480.81	5449.29	4383.91	5169.47	8052.03	5763.67	2200.54	3101.86	4550.49	3629.57	3370.61
Bradi1g11900.1	1.90938e-09	6.96151e-08	0.999997	0.999999	0.00992574	8.50542e-12	217.39	1.5752	1.68296	1.5752	57.6002	217.39	MALLRFLIIIIYQKGCENKVMARRDTTCVDQTQRPSHGSCGVIELSQWKPRLRRSTGPSVSMAHCSQVTTTKRTMLNVSLQKEKEKFNLPLVLGFIALFPFRRLPEWRGRGNGMDTVAGPRAKQKLGRPLIPPNYVSLRHLQELRLKEEEQRQREEEEAAARVREEQRRREEEEAAERRRVVEEQRRRDEEEAAARRRVLEEQRRREEEEAAARRVKEAAAAAPMKPSSSSNTSFGYKERSRGGQRSVVVAHRRRPPSRGEGTAMKSDGATGGCHGQKGPDGDAANAPLGTGRKAQNEGKEKDKVLATISGGSGEPTGEATASLYGGNPEEKKKVEASGYQGSASGMMSSAPGELAEAGIGSHRGSGRQKHKHKGKKGLDGRSIEIALSSMTGKQDSSP…	unknown protein	Brachypodium distachyon	unclassified	unknown	unknown	445.323	50.2324	229.253	160.707	221.379	295.806	415.941	200.402	578.14	372.572	365.129	202.81	456.829	370.095	348.716	16424	9839.91	9775.92	14966	12751.5	33100.4	48196.7	56816	54388.9	48125.5
Bradi1g13232.1	0.000442962	0.00103563	0.0023319	8.20347e-05	0.0062821	0.00904279	2.82343	2.08508	2.28961	2.82343	2.13971	2.08508	MAGSRQLAVAALLLVAAAGVCTRLPPAGALGVNWGTMASHQLPPSSVVRMLQDNGIKKVKLFDADAGPLEALAGSGIEVMVAIPNIMLDMMTDYDTARDWVHKNVSAYNFDGGVNIKYVAVGNEPFLSSLNGTFLNVTFPALQNIQRALNEAGVGDTVKATVPLNADVYESPKDNPVPSAGRFRAEISGLMTEIVQFLNQSGAPFTVNIYPYLSLYGNAGFPLDFAFFDGTTSPVVDTNSGISYTNVFDANFDTLVSALNAAGVGGLPVMVGEVGWPTDGDKQATAAYAQRFYAGLLKKLASNAGTPLRANQYVEVYLFSLIDEDVKSVAPGNFERHWGIMRYDGQPKYAMDLTGQGRNTALVGARGVEYLPRAWCVLNANAPAESMSRLGDNVDYACS…	glucan endo-1,3-beta-glucosidase 8-like	Brachypodium distachyon	cell structure	Y	PM	16712.1	23064.4	29220.6	26658.9	23914	69633.2	50433.4	46012.9	52935.6	54753.8	63816.4	66512.2	69032	70717.1	67519.4	72823	51323.7	40295.1	40233.9	51168.9	57980.4	32520.2	52214.8	56735.3	49862.7
Bradi1g13777.1	1.41586e-07	1.73636e-06	0.097619	0.00754395	6.20994e-06	5.43028e-09	8.22578	2.59271	2.59271	3.49036	6.1065	8.22578	MAAASSLHVAAPAATPRVGSAGRKSSSPAVRSVRVARSGAEARPRGRLVSCGAVATKADAPATAGASKSDGHEVLLFEALREGLMEEMQSDPTVCVFGEDVGHYGGSYKVTKGLADMFGDLRVLDTPIAENSFTGMGVGAGMKGLRPVIEGMNMGFLLLAYNQISNNCGMLHYTSGGQFKIPVVIRGPGGVGRQLGAEHSQRLESYFQSIPGLQMVACSTPYNAKGLMKAAIRSENPVVLFEHVLLYNLKEKIPDEEYVLCLEEAEMVRPGEHVTILTYSRMRYHVMQAAKTLVNKGYDPEVIDIRSLKPFDLHTIGNSIKKTHRVLIVEECMRTGGIGASLRSAIIDNFWDYLDAPIMCLSSQDVPTPYAATLEDATVVQPAQIVAAVEQICQ	pyruvate dehydrogenase E1 component subunit beta-like	Brachypodium distachyon	energy	N	mitochondria	3867.96	2399.82	2593.21	1150.29	2502.82	5410.19	6659.26	6963.02	6923.85	6489.08	9845.81	8389.52	8965.73	7741.87	8735.73	11236.9	14989.4	18343	16564.5	15283.5	15904.4	19367.7	25656.8	21421.5	20587.6
Bradi1g14000.1	0.000557323	0.00126969	0.717493	0.0429556	0.00292526	0.000411596	1.73765	1.14244	1.14244	1.40001	1.6009	1.73765	MASSTSEVPEGKSKLKKSGSLGSSDTYVRADKIDLTSLDIQLEQQLTKKWGKANLKSQGPKADWEIDLAKLEIRYVIAQGTYGTVYRGTYDGQDVAVKLLDWGEDGFATEAETAALRTSFKQEVAVWHKLSHPNVTKFVGASMGTADLKIPANDSGARANLPARACCVVVEYLAGGTLKQYLIKNRRRKLAYKVVVQLALDLSRGLSYLHSRKIVHRDVKTENMLLDTQRNLKIADFGVARVEAQNPKDMTGATGTLGYMAPEVLDGKPYNRKCDVYSFGICLWEIYCCDMPYPDLSFADVSSAVVHQNLRPDVPRCCPSAFANIMRKCWDANPDKRPDMDEVVQLMEALDTSKGGGMIPDGQSSGCLCFTRARGP	serine/threonine-protein kinase HT1-like	Brachypodium distachyon	signal transduction	Y	PM, cytosol	77526	67064	77238.1	81047.2	75718.8	99813.3	85735.4	81974	78493.5	86504.1	105505	84468.6	127700	106357	106007	110855	102148	136771	135099	121218	111345	121600	159453	133895	131573
Bradi1g14410.1	3.10497e-08	5.23575e-07	0.995919	0.7306	1.17726e-08	8.43308e-06	157.115	5.04257	5.04257	15.5285	157.115	108.379	MASRIAARLLLRRPTAALSFLQSCRHARHFSTQLLEGVPRFSKPTRARYFLPNASPYQLWSRSFASENGDLIEAVVPFMGESVTDGTLANFLKKPGDRVEADEAIAQIETDKVTIDVSSPEAGVIEKFIASEGDTVTPGTKIAVISKSAAPSETHVSPSEETSQKETPPPPPPEKPKVEEKSSKVESVKPKASKLSSPSEPQLPPKERERRVAMPRLRKRIANRLKDSQNTFAMLTTFNEVDMTNLMKLRSDYKDEFVEKHGVKLGLMSCFVKAAVSALQNQPIVNAVIDGDDIIYRDYIDISVAVGTSKGLVVPVIRDTEGMNFADIEKGINKLAKKATEGALSIDEMAGGTFTISNGGVYGSLISTPIINPPQSAILGMHSIVQRPVVVDGSILARP…	dihydrolipoyllysine-residue succinyltransferase component of 2-oxoglutarate dehydrogenase complex 1, mitochondrial-like	Brachypodium distachyon	metabolism	N	mitochondria	353.906	0	0	76.2655	107.543	639.373	341.511	881.621	306.667	542.293	1509.14	1432.97	3116.03	621.798	1669.98	17331.3	10731.9	18970.9	20552.3	16896.6	9926.2	10957.8	15185	10552.8	11655.4
Bradi1g19060.1	3.60718e-12	2.43304e-09	0.997756	0.979176	4.05766e-06	0	12.576	0.763349	1.13034	0.763349	5.06526	12.576	MSVLSWLLLRGYKRPPPPPLARCYHQRAPALPPTQTHLARGRRGWRHEPRKAAAAGLVAYSSMFLLPYAVTLLPLRRVPSTVRVRRIADDIIRGIHLILPNSPSSDEDKPGPQTPDLSELDWEVIVVRDKRANAYCRPGGKIIVNTGFLECLATDAEIVTILAHEVGHAVARHCLELHEVAFVTILPHFTLASRIERGRGGSDRNHATCCRGFRSTRSARGLPEARRDQRKLGMERLRGVPSFGYDKISAFIQSKAMKDAVELYRRKSALGEAPTDVLLWWNS	OMA1-like metallopeptidase, mitochondrial-like	Brachypodium distachyon	unclassified	N	mitochondria	1840.21	490.266	1671.39	1615.64	1404.38	866.516	1425.08	1565.4	2492.71	1587.43	878.861	1713.55	665.768	1029.94	1072.03	6873.23	6236.09	5844.42	9500.35	7113.52	15551.6	19316.7	17860.3	17917	17661.4
Bradi1g21060.1	2.74931e-08	4.75489e-07	0.999856	0.999268	0.040346	1.83696e-09	15.1695	0.776186	0.851831	0.776186	4.64004	15.1695	METPPPFQESAHCDVCRCTFSTFRRRHHCRNCGRTLCHEHSSYHMALPQYGIYTDVRVCYECFSKSSRRGGVRNESSPVSVSSVSDSLSGLNLDKDDASSPTKYSAAQSSAAIVECKCGMPLCICEAPKPEPAPVKQNISTTSSTVQSNTRPKKSTSNQQSADPSAKKASATSSSNSSSFLNLGLMSSDSNDKNLSDYDVTGEGLREAIKSGDINAVKKLLSEGVDCNYCDKQGFTLLHLAALFNQTEIALILMDSGANIQRKNGQGETPLDCAPPMLQYKMRQRMEELAASRRPE	vacuolar protein sorting-associated protein 27	Brachypodium distachyon	unclassified	N	vacuole	9853.68	14135	12158.6	10718.6	11716.5	10996.5	8225.82	6559.41	14140	9980.45	9384.36	5951.48	9604.13	11436.6	9094.15	54026.4	42405.6	56729.7	64297.6	54364.8	124819	159590	233395	193128	177733
Bradi1g21310.1	1.3621e-06	9.6203e-06	0.0337667	6.85293e-07	0.0482238	4.59657e-05	2.9351	1.56703	1.60514	2.9351	1.56703	2.26935	MERYEVIKDLGSGNFGVAKLVRDVRTKELFAVKFIERGHKIDENVQREIMNHRSLRHPNIVRFKETYAKMSWLKLHPQVVLTPTHLAIVMEYAAGGELFERICSTGRFSENEARFFFQQLLSGVSYCHSMQICHRDLKLENTLLDGSEAPRLKICDFGYSKSSVLHSQPKSTVGTPAYIAPEVLSRREYDGKVADVWSCGVTLYVMLVGAYPFEDPVEPKNFRKTITRILSVQYAVPDYVRISMECRHLLSRIFVANPEQRITIPEIKNHPWFLKNLPIEMTDEYQLRLQMVGINAPSQTLEDSMAIIQEARKPGDGSKFAGQLCVPGLGSMELDDIDADDIDVEDSGDFVCAL	serine/threonine-protein kinase SAPK2-like isoform 2	Brachypodium distachyon	signal transduction	N	nucleus	2508.54	3166.45	2869.76	2675.96	2805.18	4683.37	4492.55	4158.46	4676.39	4502.69	9394.53	7750.46	6603.54	9185.43	8233.49	5221.78	4722.58	4029.01	3609.85	4395.8	5556.33	7313.88	7127.94	5465.51	6365.92
Bradi1g22860.1	2.32932e-06	1.48219e-05	0.999978	0.999963	0.0306992	2.26309e-06	19.0264	0.811363	0.833858	0.811363	7.83991	19.0264	MLRAMHLAFRRENSSRATSLRGLAGHFSTASTNNCQRLAGKVALITGAASGIGKATAIEFVRNGAKVILADIQDAPGRALAASLGADAAEYTRCDVTDEAQIAAAVDLAVSRHGRLDVLYSNAGISSGTGPAPLAELDLADFDRVMAANARSAVAAFKHAARVMAAPRGAGGCVLCTGSTTGMMGGVAALPYSLSKAAVVAAVRLAAAELARAGVRVNSISPHAIATPMVVAALARANPGVGEEELKGMVERGIGIGMGGGGIRGAVLEVEDVARAAVYLASDEAKYVTGHNLVVDGGFTVGKPINLSAAT	short-chain dehydrogenase reductase 3a	Brachypodium distachyon	disease/defence	N	mitochondria	240.973	366.378	613.827	778.942	500.03	653.244	178.474	545.151	290.947	416.954	482.936	459.597	161.042	519.248	405.706	4623.8	2088.1	2910.56	6058.29	3920.19	5478.36	8732.65	11161.3	12682.8	9513.78
Bradi1g23450.1	3.38806e-05	0.000119023	0.999997	0.636411	0.00161117	0.00113001	3.54999	0.384193	0.976945	0.384193	3.52545	3.54999	MASDALTEAGQPKKKGNVRFAFACAILASMTSILLGYDIGVMSGASLFIKKDLQISDVQVEVLMGILNVYSLIGSFAAGRTSDWIGRRYTIVFAAVIFFAGALVMGFSVNYLMLMFGRFVAGIGVGYALMIAPVYTAEVSPASARGFLTSFPEVFINFGILLGYVSNYAFSRLSLRLGWRVMLGIGAAPSVLLAFMVLGMPESPRWLVMKGRLADAKVVLAKTSDTPEEAAERLADIKDAAGIPQDLDGDIVEVPKKGGSEEKRVWKELILSPTSAMRHILISGIGIHFFQQASGIDAVVLYSPRVFKSAGITNENRLLGTTCAVGVTKTVFILVATFLLDRVGRRPLLLSSTGGMIVSLVGLAAGLTVVSRHPDEQIPWAIALCILCILAYVAFFSIG…	polyol transporter 5-like	Brachypodium distachyon	transporter	Y	PM	323638	91096.7	51778.1	85592.3	138026	197266	107137	150682	84290.3	134844	69627.6	44109.8	43886.7	54490.8	53028.7	677463	571687	374881	322384	486604	643289	397869	438540	480267	489992
Bradi1g25180.1	0.00120439	0.00248428	0.751242	0.00134241	0.00321211	0.15028	2.2938	1.26423	1.26423	2.2938	2.15188	1.59401	MAASPALFALLACLCGALAMAVAASDTLKQGESLTVSATLVSSPAGVFEAGFYAPDPKQPARLYLCIWYRGIQPRTVAWVANRANAATGPSPSLTLTAAGELRVLDGAARDDGAPLLWSSNTTTRAAPRGGYSAVILDTGSFQVRDVDGTEIWDSFWHPSDTMLSGMRISVNAQGKGPAERMLFTSWASETDPSPGRYALGLDPVNPNQAYIWRDGNVPVWRSGQWTGLNFVGIPYRPLYVYGYKQGNDQTLGTYFTYTATNTSLQRFVVTPDGKDVCYMVKKATQEWETVWMQPLNECEYYATCGSNAICTVVQDRKAKCTCLKGFQPKSPDQWNAGNRSQGCVRNPPLGCQVNQTGDGFLSIQNVKWPDFSYWVSGVTDEIGCMNSCQQNCSCGAYV…	G-type lectin S-receptor-like serine/threonine-protein kinase B120-like	Brachypodium distachyon	signal transduction	Y	PM	13322.5	6418.13	16289.4	13007.5	12259.4	13716.6	15893.6	13956.2	18428.3	15498.7	26857.3	22617.5	31136.4	31871	28120.6	22316.3	32143.7	30656.4	20406.3	26380.7	28303.5	20642.7	14230.6	14989.3	19541.5
Bradi1g25430.2	0.0012476	0.00255777	0.837785	0.725216	0.000523658	0.6674	4.72737	1.59104	1.59104	1.72753	4.72737	1.79243	MAQAMASMTGLTSAQGVRLPGPAGRRGASKLTVRASAEAETAGRRAVLGLMASGVAGGAFAQAVLAAVNPIKVGPPPLPSGGLPGTENSDEARDFALPLKNRFYLQPLPPAAAAARAKESAQDILNLKPLIDKKQWPYVMNDLRLRASYLRYDLKTVISSKATKEEKKDLKDLTGKLFDTLDGLDHAAKIKSPAEAEKYYGETKTVLSDVLAKLG	oxygen-evolving enhancer protein 3-1, chloroplastic-like	Brachypodium distachyon	energy	N	chloroplast	31586	39983.2	36637.5	27912.5	34029.8	36335.8	45688.1	65823.7	68723.4	54142.8	73139.5	60887.7	53210.4	47911.9	58787.4	220246	232617	104581	86041.1	160871	47605.6	62809.2	62697.4	70872.1	60996.1
Bradi1g25440.1	0.00674489	0.0110423	0.0839906	0.49644	0.00204096	0.0504345	2.67084	1.50643	1.92871	1.50643	2.67084	2.03108	MAGSLLANYVQVNVMLPLDVVSVDNKFEKGDKLRAQLKKLTEAGVDGVMIDVWWGLVEGKGPKAYDWSAYKQVFELVQEAGLKLQAIMSFHQCGGNVGDVVNIPIPQWVRDIGATDPDIFCTNRSGKRNIEYLTLGVDDQPLFHGRTAIQMYTDYMASFRENMKEFLNAGVIVDIEVGLGPAGEMRYPSYPQSQGWVFPGIGEFICYDKYLVADFKAAAAKAGHPEWELPDDAGEYNDTPEKTQFFKDNGTYVTEKGDFFLSWYSNKLIKHGDKILDEANKVFVGYTVQLAIKISGIHWWYRVPNHAAELTAGYYNLDDRDGYRTIARMLKRHHASLNFTCAEMRDSEQSSEAKSAPEELVQQVLSAGWREGLDVACENALGRYDATGYNTILRNARPK…	Beta-amylase	Brachypodium distachyon	energy	N	plastid/cytosol	390833	511661	378795	356808	409524	896123	679091	820612	763593	789855	634716	399290	454840	978824	616917	720995	862150	1.25002e+06	1.54193e+06	1.09377e+06	897599	663447	778191	987862	831775
Bradi1g25890.1	0.0049337	0.00845687	1	0.991556	0.00423766	0.278884	11.071	0.999256	0.999256	1.83586	11.071	5.42527	MASSVDLEDRFDISGPTHIMSRAGGTGRSSPTTIDWNKEEHRRCVAACIVKGTYILENDRTRCRVHAEALAPPWWESFHFRLVDVLKDESYKRSGDKFIFGAIYEHVPPPGGRHHHPSAPRYVVAFRGTMLLHPKAIHDLCLDFKILVNTLAECKRSQRAHQAVDTLLKTIANGKTAAGGGSSDSVWLTGHSLGASLALDVGRAMMSEQGLSIPTFLFNPPQVSLAPAINKLLPSEGLRRDLYAKSNLVKAGLGLVLSPHRKRMEKLFELLSPWAPNLYVHDKDLICQGFIDYFGQRQQWEAQEEQRCRGGVSKSSSAMTLSYRDMLFSVLGKEKERPHLLPSATLWRNSSVGSDAHGLQQWWKPDGELRLSDRRYSYP	GDSL esterase/lipase At4g10955-like	Brachypodium distachyon	metabolism	N	multiple localizations	8603.09	4150.8	32280.4	33248.5	19570.7	23545.4	10641.8	27125	16912.2	19556.1	40515	18529.5	44126	40545.9	35929.1	422446	95315.8	186533	162370	216666	46401.2	65085.2	180751	132468	106176
Bradi1g26350.1	1.08203e-06	8.24662e-06	0.16658	0.953094	2.63272e-07	0.000706038	3.93184	1.17774	1.68673	1.17774	3.93184	2.70722	MSCSHLSTAWSSSALASSSTRRRGASSSSSSSLVVRCSLRDLRNRIESVRNTQKITEAMKLVAAAKVRRAQEAVVSSRPFSEALVEVLYNMNQEIQTEDIDLPLTRQRSVKRVALVVLTGERGLCGAFNNNVLKKAESRMEELRQLGVEYTVISVGKKGNAYFQRRPYIPSERFLELAGIPTVKDSQAICDLVYSLFVAEEVDKVELLYSKFVSLVRSDPIIQTLLPMSPKGEICDVNGICVDATEDELFKLTTKEGKLTVEREKIKIETQPFSPVVQFEQDPVQILDALLPLYLNSQILRALQESLASELAARMSAMSSATDNAIDLRKNLSIIYNRRRQAKITGEILEIVAGADALSG	ATP synthase subunit gamma, chloroplastic-like	Brachypodium distachyon	transporter	N	chloroplast	4455.26	3958.67	2814.51	4920.6	4037.26	4032.87	8229.83	8133.81	6842.53	6809.76	5393.29	5821.5	4273.05	3531.52	4754.84	19819.8	16232.3	13852.5	13590.9	15873.9	8849.03	9955.27	11475.7	13438.9	10929.7
Bradi1g27130.1	1.19952e-09	4.62328e-08	0.997039	0.984458	4.82498e-08	1.60298e-10	17.0433	1.31481	1.31481	1.49049	12.6621	17.0433	MAPLATSTAPLQLCSHHSHPRRRRGTVEVAASASSSSSRRAEDVVIVGAGIAGLATALSLQRLGVRATVLEQGPSLRAGGTSLTLFKNGWRVLDAIGVADDLRAKYLRIQGMRMRSAAGGRDLREFSFEEEAPGQEVRAVERRALLETLASKLPADAISYSSKLKSVAGQGAEGTVLELEDGRRLLAKVVVGCDGVNSPLARWMGFSEPRYVGHMAFRGLADYGGIGAQGQPFEPKVNYIYGRGLRAGFVPVSATKVYWFICFNSSTPPPGLGKKTKTAAGAALKREALELVRGWPEDLVAVMRGTADDAVVKTPLVDRWLWPGVAPRASRGGVVLAGDAWHPMTPNLGQGACCALEDAVVLARRLAPAVLAGGAVVGEAMRGYERERWGRVFPLTARA…	zeaxanthin epoxidase, chloroplastic-like	Brachypodium distachyon	secondary metabolism	N	chloroplast	1821.44	1351.65	1001.66	870.352	1261.28	1760.31	1370.21	2237.91	1264.94	1658.34	2134.44	1634.55	2061.87	1688.84	1879.92	16345.1	12184.1	14531.5	20820.7	15970.4	16710.8	21832.4	24525.8	22916.1	21496.3
Bradi1g27740.1	0.00184815	0.00360803	0.928368	0.0163827	0.0177499	0.999722	2.55688	0.713514	0.713514	2.55688	2.53417	1.06427	MSNLKLGVEVVSAHDLIPKEQGTANAFVEVEFDDQKFRTAIKDRDINPVWNEQFFFNISDPSRLQEKELEAYVYHANRVSNNKTCLGKVRISGTSFVSQSDAAPLHYPLEKRTILSRARGELGLRVFLTDDPSVRVSAPGQDFNFASTPTTAQEQATVNSIPNPFQETRTNEVRQFQHLPREQQRPAPMAGQQYYAQGQGSYGDQQQRNYAAAGNKPEAPQVRMYSAGPQQPVDFQLKETSPTLGGGRIVHGRVMPGEKAGAYDLVEKMHILFVRVVKARELPHMDLTGSLDPYVEVHLGNYKMKTKFFEKNQRPEWDEVFAFPKEVVQSSTLEVVVKDKDILRDDYVGRVMLDLNEVPVRVPPDSPLAPEWYRLMGKDGMRDRGELMLAVWYGTQADE…	FT-interacting protein 1	Brachypodium distachyon	unclassified	Y	PM	2367.52	807.961	818.17	0	998.413	767.006	861.811	705.632	515.078	712.382	2757.95	2187.74	2759.5	2506.08	2552.82	2880.16	3719.68	2067.96	1452.8	2530.15	1555.72	566.809	1018.87	1108.94	1062.59
Bradi1g28490.1	0.000152798	0.000411427	0.339436	1	8.75472e-05	0.221684	2.36854	1.00589	1.37119	1.00589	2.36854	1.4344	MASIIVQVSAILLNLIAFGLAVAAEQRRSKATVTPDLAKEYDYCVYDSDVATGYGVGALLLLTAAQVLVMVASRCFCCGRGLKPGGSRACALMLFLFSWLTFLVAAACLLAGSVRNAYHTRYRGIFNGDPLSCETLRKGVFAAGAAFTFFTAILSEFYYISYSKSRDAAGGAPYGGSSIGMGPYN	uncharacterized protein LOC100839493	Brachypodium distachyon	unclassified	Y	PM	32001.8	24739	17910	23655.5	24576.6	27416	32039.4	39103.2	36238.1	33699.2	25094.1	27830.4	23806.4	22154.9	24721.4	71348.1	70953	46361.7	44180	58210.7	34555.8	30765.8	43022.8	32666.1	35252.6
Bradi1g29000.1	0.0165351	0.024378	0.0205476	0.520948	0.00837111	0.239179	1.79021	1.28287	1.69441	1.28287	1.79021	1.4024	MASTNMASATSRFMLAAGAVPSGGVGSSNRVSFVPSSNRLGRKLVARAEEEPAAPAPTPAAAPETAEGAVATKEPAKAKPPPIGPKRGAKVKILRRESYWYNGTGSVVTVDQDPNTRYPVVVRFAKVNYAGVSTNNYALDEIKEV	photosystem I reaction center subunit IV, chloroplastic-like	Brachypodium distachyon	energy	N	chloroplast	20240	15810	17715.7	17599.3	17841.3	35183	24513.7	34546.3	26678.8	30230.4	18838.1	24595.9	21269.9	26848.5	22888.1	37412.7	43214.6	23720.1	23410.8	31939.6	28162.3	25330.8	24799	21790.4	25020.6
Bradi1g29792.1	6.69452e-07	5.64432e-06	0.999981	0.99987	0.000100897	1.14797e-05	69.802	0	0.386556	0	52.4841	69.802	MGMTMRAAALSAGHDGDERALVAFKEKVSDRSGVLASWNQSVSYCTWEGVRCSKRHRSRVVVLDLHSQGLSGTISPAIGNLTFLRYLDLSINPLHGEIPPSIGSLRRLEYLGLQRNMLTGAIPINISRCTSLRSMTIADNKGLQGSIPAEIGDMPSLSVLQLYNNSLTGTIPSLLGNLSQLTKLSLAANHLQGSIPEGIGNNPNLGFLQLAINNFTGLLPLSLYNLSSLHRFYMTDNNLHGRLPADLGRILPSMQVFAIGNNQFAGFVPPSITNLSRLQAFDVPNNRFNGVFPSALGRLQYLQWFNLVGNMFEANNEQEWQFLTSLTNCSRLQLMSIEQNRFSGQLPTSLCNLSTNIQEINIFANNISGIIPSDIGNLIGLEVLVLGRNLLDGIIPESI…	LRR receptor-like serine/threonine-protein kinase At3g47570-like	Brachypodium distachyon	signal transduction	Y	PM	149.689	345.771	403.866	733.926	408.313	0	134.115	497.228	0	157.836	0	0	0	0	0	23832.2	11956.2	22797.9	27133.5	21429.9	18825.1	25008.9	41060.8	29109.3	28501
Bradi1g34190.2	3.12453e-07	3.09926e-06	0.305141	0.000308505	4.89834e-06	1.52915e-08	3.60449	1.45464	1.45464	2.39335	3.07623	3.60449	MGWGTILSRRLKVFSLALFVYLDYKAVQKRVQWVSTVKKNAIWAKTHERNARRVLSLMIELEGLWVKMGQYLSTRADVLPEPYINVLKQLQDSLPPRPLEEVRGTIEKELGKPMGELFASFDIDPLATASIAQVHRATLENGREVVVKIQHDGIKEIILEDLKNAKSLIEWIAWAEPQYDFNPMIDEWCKEAPKELDFNHEAENTRTVSKNLSQKTEIGSGSVSSAVDVLIPEVIQSTDRILILQYMDGIRLHDNDSLEAYGVDKKKLVEEITRAYAHQIYIDGFFNGDPHPGNFLVSKEPPHKPILLDFGLTKRISESMKQALAKMFLSCAEGDQVALLSAFAEMGLKLRVDMPQQSMEIASIFFRQSTTAIEAKENIKALNEQRERNAKALQEKMKL…	ABC1 family protein	Brachypodium distachyon	transporter	Y	PM, Golgi apparatus, ER	4966.68	5344.13	3523.14	4389.48	4555.86	7482.3	5760.86	5924.61	7340.78	6627.14	10010.2	11741.7	9261.64	12601.5	10903.8	11627.6	13472.7	18541.9	12417.3	14014.9	16895	17870.9	14972.4	15948	16421.6
Bradi1g42760.2	9.15077e-06	4.04734e-05	0.999946	0.963215	0.000397656	5.4991e-05	253.575	4.59043	4.59043	20.8099	210.399	253.575	MIHLLVQEKAILETRPVLRKAVEELYTSLPPRSTMVVADLGCSSGPNTLLVVSEVMGAIRAYTDNKNKWEEEEEAQRAIELQFFLNDLPGNDFNLVFRSLEHFENLGVRLGEKEMPPYYVAGLPGSYYRKLFPCGSVHLFHSSYSLMWRSKVPEEISSGTHLNEGNIYIGETSPPAVIELFQEQFQKDFELFLALRSEELVSGGRVLLTFLGRKSEEMMMHGDVSTLFELVAKSLRSLVLKGRVEKEKLDSFNLPYYTPSVKEVKALINENKLFNIEDIRLFESNWDPQDDSEGDVVLDCARSGANVAKCIRAVLEPMIIDHFGEDIVDELFMLYASIVAKHMKKAKAKYPIILVSLKKATGRMV	anthranilate O-methyltransferase 2	Brachypodium distachyon	disease/defence	N	cytosol	124.25	0	0	121.567	61.4544	92.2625	0	860.472	175.674	282.102	1720.62	1320.61	1397.87	676.339	1278.86	19460	6901.45	10007.1	15351.3	12930	10079.7	13305.5	22604.4	16343.6	15583.3
Bradi1g43410.1	1.18912e-06	8.82491e-06	0.80372	0.0639312	0.000334138	0.000257513	2.53708	0.252203	0.752137	0.252203	2.50125	2.53708	MPTSGDGPTSQPHVVLLPSAGMGHLVPFSRLAVALSSAHGCDVSLVTVLPTVSSAESSHLEALFGAFPAVRRLEFHLADFDASEFPNADPFFLRFEAMRRSAPLLLGPLLARASATALVTDIALSSVVIPVAKQLRLPCYVLFTASAAMLSLCVHFPAYLDANGNGLVGDVDIPGVYQIPKASVPQALHDPKHLFTRQFVANGRELAKSDGVLVNSFDAFEPEAIAALREGAVSAAGFFPPVFSVGPLAPVSFPAGNNNRADYIQWLEAQPARSVVYVSFGSRKAVARDQLRELAAGLEASGHRFLWVVKSTVVDRDDDADLGELLGEGFLERVQGRGMVTKGWVEQEDVLKQESVGLFISHCGWNSVTEAAAGGLPVLAWPRFGDQRVNAGVVARSGL…	Glyosyltransferase	Brachypodium distachyon	secondary metabolism	N	Golgi apparatus/ER	16502.3	15813.9	6689.47	9789.75	12198.9	5822.4	4062.08	16980.1	9836.3	9175.21	2895.99	3437.82	3184.52	2788.04	3076.59	27762.2	35082.7	29627.1	29577.5	30512.4	23792.4	41698.4	29532	28775.1	30949.5
Bradi1g43430.1	0.00125725	0.00257365	0.371088	0.450812	0.00227464	0.00158457	2.08573	1.33705	1.37101	1.33705	2.03062	2.08573	MSEESGRPLPKFGEWDVNDPASADGFTVIFNKARDEKKAGNGQDTESPCKDTRTERVESYAAKTNSKKWFCCVTPSPTQS	RPM1-interacting protein 4-like	Brachypodium distachyon	diease/defense	Y	PM	64491.2	66921.1	74019.1	80737.2	71542.1	88447.9	96101.3	102773	105018	98085	76688.2	98303.6	82422.5	125207	95655.4	99672.4	196066	126661	158699	145275	174063	157569	149616	115623	149218
Bradi1g44200.1	0.000220182	0.000561484	0.389754	0.0269626	0.00207947	4.28363e-05	1.99229	1.24979	1.24979	1.50122	1.70956	1.99229	MALLHALRGAAKPLAVVLTAVVFCVLRTGIKKESEADVYNSELTPLQRHVAFFDRNKDGIIYPSETYEGFRAIGCGVALSAFSAVFINGLLGPKTIPENEKAAAFKFPIYVKNIHKGKHGSDSGVYDSHGRFVPEKFEEIFKKHAHTRPDALTGKELQELLQANREPNDLKGRVGGFTEWKVLYSLCKDKEGYLHKETVRAVYDGSLFVKLEQERKEAKESAKKK	probable peroxygenase 5 isoform X1	Brachypodium distachyon	unclassified	N	apoplast	18442.9	14334.9	17394	17780.3	16988	21509.1	27939.3	18449.9	17027.4	21231.4	25972.5	29387.7	24437.3	22213.7	25502.8	32657.7	32601.9	29492.1	21416.4	29042	38424.8	31041.5	35378.3	30535.5	33845
Bradi1g45380.1	0.000959479	0.0020224	0.0362382	0.00643024	0.00063293	0.00065306	1.82238	1.47693	1.47693	1.62112	1.82238	1.80311	MAGGKEPIEVKFRLFDGTDIGPSKYDPSTSVTSLKEFILARWPQDKEVVPKTVNDVKLINAGRILENNKTLAESRVPVGEVPGGVITMHVVVRPPQSDKSEKQLSNSPKQNRCGCTIL	membrane-anchored ubiquitin-fold protein 3-like	Brachypodium distachyon	protein destination and storage	Y	PM	24445.5	20054.1	29111.5	27899.9	25377.8	32486.1	37452.9	45539.2	34446.4	37481.1	37666.2	52424.2	30438.2	44033.2	41140.4	46318.4	44762.9	45367	48543.6	46248	37884	50857.2	44647.8	49646.3	45758.9
Bradi1g45910.1	2.07325e-07	2.27595e-06	0.000414429	2.57744e-10	0.00789184	0.222099	4.35924	1.58205	2.59027	4.35924	2.13199	1.58205	MEVITRRPASPPSLPRRGEFRFDDSVYATAPCSPHRRLPSLTAPPSPDPFDLLPPPSDTPRHTGANPFDLFQHFTSAPASPRRAAAIYAHFADANRDDGAHEDDKDDDEEEFQQRSSYSTAASAVPFDWEETPGTPKAGIGMGGAPAWDDADAEDTGDFEFGTVVDKAAPAESTLTTADELFEKGRIRPLKPLMKTPSDMSDKGSSSGKMMRPLKPPPGLLDGGGPSVGSSPRSPMAVLRSPRRRSRVGSGTDFDPFAAALLEASKAAPVPSLSPLGTTKEANGMVKPKTMTASKSAGWRRWRLSDLLLFRSSSEGGRINRDSVFRCSPAKANGKVGSVDDKPKMKQGGAAVADGVVGCARLSPLQRLARGLGGHSWHHGRGMAATGTKG	uncharacterized protein LOC100823331	Brachypodium distachyon	unclassified	N	nucleus	4130.98	2347.58	5238.67	5988.43	4426.42	13528	12939.1	9467.49	9927.92	11465.6	19088.4	20149.1	17986.8	19958.9	19295.8	10840.8	8881.96	10780.3	7245.3	9437.09	9551.3	9205.04	5306.13	3948.73	7002.8
Bradi1g47140.1	0.00121529	0.00250294	0.0185032	0.000148377	0.0186622	0.032565	3.28442	2.20456	2.31937	3.28442	2.31891	2.20456	MASSTATAAAFAYLLPAAQGSSSRLPKAAAASFARLPAHSAAAVSVGAPRRRRWAPGVAYATAATEKSIYDFTVKDIDGKGISLSKFKGKPLLIVNVASQCGLTTANYTELSHLYEKYKTQGFEILAFPCNQFGFQEPGSNSQIKQFACTRFKAEFPIFDKVDVNGPNTAPIYKFLKSSAGGFLGDLVKWNFEKFLVDKNGKVVERYPPTTSPFQIEKDIQKLLAA	phospholipid hydroperoxide glutathione peroxidase 1, chloroplastic-like	Brachypodium distachyon	disease/defence	N	chloroplast	3728.34	3004.9	7095.16	5548.57	4844.24	7242.73	15613	12131.2	9955.4	11235.6	15807	16671.5	14240.8	16922.7	15910.5	14590.3	11296.1	9674.08	9373.07	11233.4	8346.31	6462.1	12674.6	15234.6	10679.4
Bradi1g50180.1	0.000573278	0.00129975	0.0399156	0.211728	0.000214432	0.00162555	10.5132	4.32635	5.93337	4.32635	10.5132	8.67697	MPKAAGDAKLLIQSLSKAYAATPTNLKIIDLYVVFAVATAVVQVVYMGVVGSFPFNSFLSGVLSCIGTAVLAVCLRIQVNKDNKEFKDLAPERAFADFVLCNLVLHLVIMNFLG	Dolichyl-diphosphooligosaccharide--protein glycosyltransferase subunit DAD1	Brachypodium distachyon	protein destination and storage	Y	PM, ER	0	463.033	604.755	1193.29	565.269	2254.27	4912.94	3182.9	3065.68	3353.95	2239.32	2160.09	2235.72	3147.08	2445.55	5005.22	9056.49	4004.62	5704.78	5942.78	3675.14	7457.83	4629.75	3856.57	4904.82
Bradi1g51670.1	0.00593767	0.00991326	0.0705339	0.280541	0.001178	0.125646	1.57467	1.21578	1.31519	1.21578	1.57467	1.27559	MAAHSVAAAHATMAAPAGAASSACSAPAERLGFRLSSLAGRGLRLPSRPSAASSSSSRRTNRVRAAASVETVQGQAATGALLDKSVNTIRFLAIDAVEKANSGHPGLPMGCAPMGHILYDEVMRYNPKNPYWFNRDRFVLSAGHGCMLQYALLHLAGYDAVKEADLKQFRQWGSSTPGHPENFETPGVEVTTGPLGQGIANAVGLALAEKHLAARFNKPDSEIVDHYTYCIVGDGCQMEGISNEACSLAGHWGLGKLIAFYDDNHISIDGDTEIAFTEDVSTRFEALGWHTIWVKNGNDGYDEIRKAIQEAKSVTDKPTLIKVTTTIGFGSPNKANSYSVHGAALGTNEVEATRQNLGWPYEPFFVPEDVKSHWSRHVPEGAALEADWNSKFAQYEKKY…	transketolase, chloroplastic-like	Brachypodium distachyon	energy	N	chloroplast	646985	554889	624413	734841	640282	980694	1.00153e+06	702646	683497	842092	829731	799136	654064	830825	778439	1.09186e+06	1.13828e+06	913678	889116	1.00823e+06	844758	722689	884465	815024	816734
Bradi1g52260.1	5.81151e-06	2.82004e-05	1	1	0.00250022	6.8516e-06	231.667	1.1072	1.19166	1.1072	141.151	231.667	MALLLRHSRKLRRVHGVLDCERGSIARHFSASACSTTLKKEDGVSNSSLEYGKKAGSLSISQDRKSGKDTHKFKQVSPQEARGLYSSNRVLISATGVNSLFSCGQVVLARHFSSAADLPAHEEIGMPSLSPTMTEGNIARWVKKEGDKVSPGEVLCEVETDKATVEMECMEEGYLAKIVCGDGAKEIKVGEIIAITVEEEGDIEKFKDYKAPASSAAPAESKPQSESTEPKGEEKELPKAAEPKATKTEESSHSGDRVFSSPIARKLAEDNNVPLSSLKGTGPDGRILKADIEEYLSSEAKGTKKEAAAAPGLGHVDLPNSQIRKVTANRLLKSKQTIPHYYLTVDSRVDELIKLRSELNPLQDASGGKKISINDLVIKAAALALRKVPECNSSWMNDF…	dihydrolipoyllysine-residue acetyltransferase component 3 of pyruvate dehydrogenase complex, mitochondrial-like	Brachypodium distachyon	energy	N	mitochondria	0	68.9673	0	0	17.2418	0	0	0	82.1855	20.5464	0	76.3607	0	0	19.0902	1473.38	1812.39	2202.98	4246.07	2433.71	3119.52	2670.66	5396.6	4790.65	3994.36
Bradi1g53680.1	1.44016e-05	5.79934e-05	0.0798159	0.0442816	0.000588377	0.989098	2.17453	0.349205	1.57732	0.349205	2.17453	0.917616	MKPSAAILLGAAIAALLLVSAVRGEGEEDECGSAESAAADRARVRPLKIAAFFSILVSGALGCSLPVLARRVPGLRPDGDVFFLVKAFAAGVILATGFIHILPDAFENLGSPCLPSDGPWKDFPFAGLGAMVGAIGTLVVDTLATGYFTRAHSKKGGGAVVDEEKQAAAAAGEEDVHVHTHATHGHAHGSAALVAAVGGAEDDKMDTIRYRVISQVLELGIVVHSVIIGISLGASQEPDTIKPLVVALSFHQMFEGMGLGGCIVQAKFKARSIVTMILFFCLTTPVGIAVGVGISRVYNENSPTALVVEGGLNSVAAGILVYMALVDLLAEDFMNPKVQSRGKLQLGINLSMLLGAGLMSMLAKWA	zinc transporter 8-like	Brachypodium distachyon	transporter	Y	PM	47805.7	42730.5	33159.6	56325.1	45005.2	60933.9	52557.2	96058.4	74401.8	70987.8	20190.6	14693.7	13822.6	14157.4	15716.1	62643.8	102504	104960	121353	97865.2	36961	46128.5	39603.7	42496.8	41297.5
Bradi1g54030.1	0.00158784	0.0031875	0.0198117	0.00128928	0.00211755	0.408494	1.71898	1.23391	1.50435	1.71898	1.67384	1.23391	MAFFPAATATTAAAVAFTSTRCVSPRPSSPYLPRGVASSAIAARRRAAPRAAAVRFSVRAQAAKKSVLVVNTNSGGHAVIGFYFAKALLAAGHAVTVLTVGDEGSDKMKKPPFSRFSELTSAGAKTVWGDPADVGAAVGGASFDVVLDNNGKDLDAVKPVADWAKSAGVGQFLFISSAGIYTPTDEPPHVEGDAVKGSAGHVGVEKYIAAEFGSWASFRPQYMIGSGNNKDCEEWFFDRIVRKRPVPIPGSGMQLTNISHARDLGSMLTMAVESPDAAAGKIFNCVSDRAVTLDGLAKMCAAAAGAAVEIVHYDPAAAGVDAKKAFPFRNMHFYAEPRAAKEVLGWTSTTNLPEDLKERFAEYASSGRGDKAMSFDLDDKILSAVGAAPVSVAA	chloroplast stem-loop binding protein of 41 kDa	Brachypodium distachyon	unclassified	N	chloroplast	28646.7	25186.4	26075.9	35288.8	28799.5	54126	50451.3	35710.4	33009.6	43324.3	46513.2	50905.8	46815.6	53788.3	49505.7	45295	59338.3	43500.1	44689.8	48205.8	37265	31829.9	36018.7	37029.7	35535.8
Bradi1g54847.1	3.05446e-08	5.21578e-07	0.704549	0.00298696	7.33761e-11	2.27608e-05	2.64771	1.14048	1.14048	1.57202	2.64771	1.9058	MDEKASNLDAVLKESVDLENIPLEEVFENLRCSREGLSSTQAEQRLAIFGPNKLEEKKESKFLKFLGFMWNPLSWVMEAAAIMAIALANGGGKPPDWQDFVGIITLLIINSTISFIEENNAGNAAAALMARLAPKAKVLRNGRWNEEESAILVPGDIISVKLGDIIPADARLLEGDPLKIDQSSLTGESLPVTKGPGDGVYSGSTCKQGEIEAVVIATGVHTFFGKAAHLVDSTNQVGHFQKVLTAIGNFCICSIAVGMVIEIVVMYPIQHRAYRPGIDNLLVLLIGGIPIAMPTVLSVTMAIGSHRLAQQGAITKRMTAIEEMAGMDVLCSDKTGTLTLNKLTVDKNLIEVFQRGVDQDTVILMAARASRTENQDAIDATMVGMLADPKEARAGIQEV…	plasma membrane ATPase 1-like	Brachypodium distachyon	transporter	Y	PM	439460	273089	397730	339500	362445	387337	402824	423200	440090	413363	604783	489666	501937	682704	569772	962647	1.08085e+06	875788	919311	959649	749505	681582	714258	617648	690748
Bradi1g61430.1	8.15882e-10	3.79526e-08	0.581689	0.860759	2.25925e-11	1.11798e-06	7.15771	0.389309	0.389309	0.615092	7.15771	5.43185	MASVLLVALATLLALAVSRLWSYAVVRLAWRPGAVVRRFREQGVHGPPYRFLRGCNEDVRRMKAEADGLELDVRDHDYLPRIVPHYVKWKDQYGKGLGTVDGSEWARHRKVVTPAFAMDKLKKKLQNMLSEMIQCRLASKQSGFGDLLGVMLEASFTKEQGEKQDELILTVDEIIDECKTFFFAGHETTSHLLTWTMFLLSVYPEWQERLREEVLRECGKGNPKADMLSKLKEMTMVLLETLRLYSPIMFMLRKPISDMKLGNLNLSKGNVIVIPIPMLHRDKEVWGDRANEFDPMRFENGVTKAAKIPHALLGFSMRPRSCIGQNFAMLEAKLVMAMILQKFSFTL	cytochrome P450 734A6-like	Brachypodium distachyon	metabolism	N	ER	4814.57	2401.72	4117.83	1412.78	3186.73	1237	1104.12	900.016	1721.36	1240.62	2258.97	810.112	2045.83	2725.61	1960.13	22674.1	20727.9	23379.7	24457	22809.7	12207.2	16236.2	23149.6	17646.4	17309.8
Bradi1g63320.1	5.85783e-05	0.000185934	0.803037	0.000811315	0.00464519	0.00192269	1.96296	0.824969	0.824969	1.96296	1.7988	1.88702	MGRSPRCVLLLLLAACAAALVPAAGAQGGGNSTAPAPAAAGSAPFVPRDDILLDCGATGNGNDTDGREWGGDAGSKYAPANLGSAIAGAQDPSVPQVPYLTARVSAAPFTYSFPLGPGRKFLRLHFYPANYSNRNAADAFFSVTVPAAKVTLLSNFSAYQTSTALNFAYLIREFSVNVTGQTLDLTFTPEKGHPNAYAFINGIEVVSSPDLFDLSTPELVMGDGNNQPYTMEAGTALQTMYRLNVGGQAISPSKDTGGYRSWDDDTPYIWGAGAGVSYQNDANVTITYPDNVPGYVAPTDVYATARSMGPDKDVNLAYNLTWIMQVDAGFFYLVRLHFCEIQSPITKPNQRVFDIYINNQTAMAGADVILWASPNGIGSPVYKDYVVNTMGSGTMDFWV…	receptor-like protein kinase FERONIA-like	Brachypodium distachyon	signal transduction	Y	PM	97622.9	53365.5	62301.3	41354.7	63661.1	48185.3	66688	42253.4	52946.9	52518.4	114632	92514.6	135598	157112	124964	111301	102367	129556	114830	114514	126792	122971	123846	106909	120130
Bradi1g64120.1	1.15475e-09	4.58163e-08	3.08642e-14	4.9128e-10	0.0160299	0.250114	11.3256	2.35711	11.3256	9.20461	3.47365	2.35711	MAPELSRKMTTAKAAAAAVKPATKAFVTFLAGDGDYWKGVVGLAKGLRKAGSAYPLVVAMLPDVPESHRRILASQGCILREIVPVYPPENQTQFAMAYYVINYSKLRIWEFVEYERMVYLDADIQVFDNVDELFDLPKGHFYAVMDCFCEKTWSHTPQYQIGYCQQCPDRVTWPAAEMGPPPALYFNAGMFVHEPSMATAKALLDTLRVSPTTPFAEQDFLNVFFREQYKPIPLVYNLVLAMLWRHPENVQLAKVKAVHYCAAGSKPWRFTGKEANMDREDIKVLVKKWWDIYNDESLDFKGLPADADELEAAAKKPIRAALAEAGTVKYITAPSAA	Hexosyltransferase	Brachypodium distachyon	energy	N	Golgi apparatus	7851.66	10160.9	11930.2	11618.2	10390.2	124623	134267	94506	117307	117676	90435.5	119072	83882.6	89161.8	95638	37791.2	37297.9	42676.6	26602.3	36092	29490.2	21217.4	25303.7	21952.4	24490.9
Bradi1g66590.1	0.000318819	0.000780558	0.00635248	5.12006e-05	0.0018346	0.00155266	2.33883	1.82835	1.82835	2.33883	1.95257	1.97728	MAGKGDGPAIGIDLGTTYSCVGVWQHDRVEIIANDQGNRTTPSYVAFTDTERLIGDAAKNQVAMNPINTVFDAKRLIGRRFSDASVQSDAKLWPFKVIPGPGDKPMIGVQYRGEDKQFSAEEISSMVLNKMKETAEAYLGTTIKNAVVTVPAYFNDSQRQATKDAGVISGLNVMRIINEPTAAAIAYGLDKKSTSVGEKNVLIFDLGGGTFDVSLLTIEEGIFEVKATAGDTHLGGEDFDNRMVNHFVQEFKRKNKKDISGNPRALRRLRTACERAKRTLSSTAQTTIEIDSLFEGIDFYTTITRARFEELNMDLFRKCMEPVEKCLRDAKMDKSTVHDVVLVGGSTRIPRVQQLLQDFFNGKELCKSINPDEAVAYGAAVQAAILTGEGNEKVQDLLL…	heat shock cognate 70 kDa protein-like	Brachypodium distachyon	protein destination and storage	N	nucleus	918547	791876	856673	975175	885568	2.00093e+06	1.75501e+06	1.36971e+06	1.35085e+06	1.61913e+06	2.00504e+06	2.32296e+06	1.98235e+06	1.97441e+06	2.07119e+06	2.39449e+06	1.75302e+06	1.34763e+06	1.42139e+06	1.72913e+06	1.61887e+06	1.7526e+06	1.75034e+06	1.88226e+06	1.75102e+06
Bradi1g68460.2	0.00011815	0.000327455	0.0620208	0.000662451	0.000145014	0.000145996	1.85521	1.38514	1.38514	1.73543	1.85521	1.83762	MDRRSWPWKKKSSDKSSNADASHNSNQPEQDEKVPKFVQISPETYAHLTDSEEQVKVLDEKVNVLNEKLSASQSEITTKDALVKQHAKVAEEAVSGWEKAEAEASALKVQLETVTLSKLAAEERAAHLDGALKECMKQVRTVKEEGEQKLHDVVFAKTKQWEKIKAELEEKLLEFEHELIRAGAENDALSRSLQERADLLMKIDEEKAQAEAEIEVLKSTIQSGEREINSLKYEIHVVSKELEIRNEEKNMSVRSADVATKQHLEDVKKISKLEAECQRLRGLVRKKLPGPAALAQMKMEVESLGVGRDYGDNRLRRSPAKNSSFHRPMSPMSPVPDFAFDNLQHMQKENEFLTARLLTTEEETKMLQEALTKRNSELQTSRSMYAKIAGKLRSLEVQM…	filament-like plant protein 4-like	Brachypodium distachyon	unclassified	Y	PM	16169.3	9994.25	15603.9	15980.1	14436.9	22610.7	18467.2	18619.1	20291.7	19997.2	23818.4	22860.3	26097.2	27441	25054.2	32517.5	29869.4	21871.7	22875.2	26783.5	27396.2	25240.3	26113.8	27367.4	26529.4
Bradi1g70700.1	8.1346e-11	1.07617e-08	6.91669e-14	0	5.98088e-09	6.80698e-10	11.0099	7.39183	8.9416	11.0099	9.12894	7.39183	MGILDELSEMCLCPGIRPRRRLKKRKQMTTVEMKVRIDCEGCERKIRKAVESMEGVTGVEVVPKQNKVAVTGYVDPAKVMRRVAYKTGKRVEPWPYVPYDVVAHPYAPGAYDKKAPPGYVRNVVSDPNAAPLARASSTEVKYTSAFSDENPNAACTIM	heavy metal-associated isoprenylated plant protein 27	Brachypodium distachyon	disease/defence, signal transduction	Y	PM	70671.9	65269.2	68659.6	78935.9	70884.1	659561	660037	588730	626942	633818	759213	849490	674165	838850	780430	650317	751538	605372	581163	647097	555825	502679	512416	524933	523963
Bradi1g70850.1	6.668e-08	9.36993e-07	1	1	1.56809e-07	1.56998e-06	3252.13	0.0176681	0.442879	0.0176681	3252.13	2820	MGVHGLWGLLAPVGRRVSVETLAGKRLAVDASIWMVQFMRAMRDDKGDMVRDAHILGFLRRICKLLFLRARPVFVFDGATPALKRRTLASRRRHRDAAQAKVRKTAEKLLISHLKASRLEELAAKIKSDRAKHDAKGKQIESNTGEETEKTYGDPNRNDDGGNSRGTIAPINQEKLDELLAASLAAEDEADLTDKGGHNSASVPLQQGTGIDEDENDDDEEMIFPVTTGDIDPAVLASLPPSMQLDLLVQMRERVMAENRQKYQKIKKEPAKFSELQIQSYLKTVAFRREIEEVQRGAAGKDVGGIQTSKIASEANREFIFSSSFTGDKQTLAQRGVGEHNVDNVKSKREISSTVFKSSPSSSSRSINPHNSEPLRDFGPDVETYCDERGRIRVSRVRA…	3-methyl-2-oxobutanoate hydroxymethyltransferase	Brachypodium distachyon	unclassified	N	nucleus	1.15822	14.2571	0	3.14939	4.64117	0.506481	4.38397	3.18	0.151452	2.05548	0	0	0.328002	0	0.0820005	16765.4	9739.67	14941.8	18927.8	15093.7	8777.58	11157	16127.4	16290.5	13088.1
Bradi1g71370.1	2.28059e-07	2.40353e-06	0.0743811	0.867683	1.09042e-09	4.68708e-05	2.78291	1.13374	1.45159	1.13374	2.78291	2.09122	MMSTGTDTTADAVPVAVAPAKRPPINKYAFACALLASMNSVLLGYDISVMSGAQLFMKEDLKITDTQIEILAGVINIYSLFGSLAAGLTSDWLGRRYTMVLAAAIFFTGALLMGLAPNYAFLMAGRFVAGIGVGYALMIAPVYTAEVAPTSARGFLTSFPEVFNNFGILLGYVSNFAFARLPVHLSWRAMFLVGAVPPIFLGFAVLAMPESPRWLVMRGRIDDARYVLQRTSDSPEEAEERLLDIKRVVGIPADATDADDVVAIVRANEAARGQGVWKELLINPSRPVRRMLVAGLGLMFIQQATGVDCVVMYSPRVFEQAGIKSKTNSLGASMAVGVCKTFFIPISTLLLDRVGRRPLLLASGGGMAIFLFTLATSLLMMDRRPESESKALGAVSIAA…	polyol transporter 5-like	Brachypodium distachyon	transporter	Y	PM	372791	237947	240796	306172	289426	468460	392502	462180	357365	420127	322277	356701	309965	323593	328134	738216	876738	825905	780934	805448	751460	612538	442307	614709	605254
Bradi1g72320.1	0.000115663	0.000322374	0.00280384	0.00247839	4.48656e-05	0.000147332	2.27222	1.824	1.824	1.82968	2.27222	2.10974	MRVVVTGATGYLGGRLCAALAGAGHAVRAFVRRTSDASGLPAGAELAYGEVGDVDSLAAAFDGCDAVFHVAAVVEPWLPDPSVFATVNVGGLENVLKAAKRTPTVKKIIYTSSFFAVGPTDGYVADETQMHQGKTFCTEYEKSKVLADRIALQAAAEGVPITIVYPGVIYGPGKLTTGNLVSRILIERFNGRLPGYIGDGYDRESFCHVDDVVSGHVAAMEKGRVGERYLLTGENMSFMQIFNMAANITNTKAPSFHVPLWLIEIYGWISVFISCITGKLPLISYPTVHVLRHQWAYACDKAKRELGYSPRNLTEGLSEMLLWLKDDKLIKF	dihydroflavonol-4-reductase-like	Brachypodium distachyon	secondary metabolism	N	ER	5050.3	3294.56	5518.48	4484.46	4586.95	6797.12	10444	9204.09	7021.28	8366.62	7709.05	9286.1	8137.8	8437.63	8392.65	11864.3	9319.16	11206.1	9300.69	10422.6	7701.37	10808.4	10442.7	9756.61	9677.25
Bradi1g72400.1	8.99327e-08	1.21355e-06	0.999997	1	3.73548e-05	3.99583e-07	74.8104	0.617656	0.617656	1.10135	61.935	74.8104	MDTGCLSSMNITGANQVRSFVGQLHIQRGFTSSSVQTLKGSRRASFSLKTPVLRNKGKGLRRGPGVLQVVCQDFPRPPLESTINYLEAGQLSSSFRSSERPSKPLQVVIAGAGLAGLSTAKYLADAGHKPILLEARDVLGGKIAAWKDEDGDWYETGLHIFFGAYPNIQNLFGELGINDRLQWKEHSMIFAMPNKPGEYSRFDFPETLPAPLNGVWAILRNNEMLTWPEKVKFAIGLLPAMLGGQAYVEAQDGLTVSEWMEKQGVPDRVNDEVFIAMSKALNFINPDELSMQCILIALNRFLQEKHGSKMAFLDGNPPERLCMPIVNHIQSLGGEVRLNSRIQKIELNPDRTVKHFVLSDGSNITGDAYVFAAPVDIFKLLVPQEWKEISYFKKLDKLV…	phytoene dehydrogenase, chloroplastic/chromoplastic-like	Brachypodium distachyon	secondary metabolism	N	chloroplast	1180.7	2852.31	4404.34	3428	2966.34	1123.04	2226.16	1800.86	2178.65	1832.18	4494.24	2668.58	2597.27	3307.81	3266.97	239867	128510	167427	199076	183720	145218	200998	291751	249685	221913
Bradi1g73170.1	0.00351687	0.00632568	0.978099	0.471972	0.00176686	0.125353	2.46499	1.14032	1.14032	1.45063	2.46499	1.7297	MAHGEVELSVGVGGGGGGAGGAMEAPVRISIGRLVLAGMVAGGVQYGWALQLSLLTPYVQTLGLSHALTSFMWLCGPIAGLVVQPCVGLYSDKCTSRWGRRRPFILTGCVLICLAVVIVGFSADIGAALGDSKEECSLYHGPRWHAAIVYVLGFWLLDFSNNTVQGPARALMADLSGQHGPSAANSIFCSWMALGNILGYSSGSTNNWHKWFPFLRTRACCEACANLKGAFLVAVLFLSFCLAITLVFAKEVPYKAIAPLPTKANGQVEVEPTGPLAVFKGFKNLPAGMPSVLLVTGLTWLSWFPFILYDTDWMGREIYHGDPKGNPNEVTAFNDGVRAGAFGLLLNSIVLGFSSFLIEPLCKRLGPRVVWVSSNILVCIAMAATCIISWWSMKDFHGY…	sucrose transport protein SUT1-like	Brachypodium distachyon	transporter	Y	PM	31253.5	17251.3	27961.2	38536.8	28750.7	41394.6	36974.3	27605	25165.9	32784.9	50107.4	51055.4	29119.9	36543.2	41706.5	84410	96989.4	61599.4	40481.9	70870.2	53661.7	50070.9	48891.3	46296.4	49730
Bradi1g73770.1	0.00166227	0.00331226	0.222538	0.430879	0.000323064	0.0402303	2.34251	1.37381	1.48869	1.37381	2.34251	1.73481	MASPSSSLCSSLGYPRAASFGHRRRVVFSSTRKVFQVKASSRVDKFSKSDIIVSPSILSANFAKLGEQVKAVEVAGCDWIHVDVMDGRFVPNITIGPLIVDALRPVTDLPLDVHLMIVEPEQRIPDFVKAGADIVSVHCEQTATIHLHRTIDQIKSLGAKAGVVLNPGTPLSAIEYVLESVDLVLIMSVNPGFGGQSFIESQVKKIADLRKLCEEKGVNPWIEVDGGVSPKNAYKVIEAGANALVAGSAVFGAKDYAEAISGIKTSQRPVAVPA	ribulose-phosphate 3-epimerase, chloroplastic-like	Brachypodium distachyon	energy	N	chloroplast	31647.6	22804.2	24766.2	43562.3	30695.1	51123.5	50679.6	45293.5	35684.5	45695.3	42160	43477.9	38582.3	44456.9	42169.2	64059.5	103204	65884.3	54465.9	71903.4	46376.4	55679.7	57230	53714.9	53250.2
Bradi1g73780.1	7.18887e-06	3.30982e-05	0.994948	0.854184	3.17853e-05	0.0245484	5.22297	0.514556	0.818793	0.514556	5.22297	2.94414	MAAAAGWLRRAASAVSLPRMPSGLPLMPTPPPAPLPEAQSLVLPGLGAAVGPAMELMAVPKKKISKYKRGLRNGPKALKPVPVIVRCRCCGRVKLPHFYCCSGERGNPGDSSS	ribosomal protein L32 containing protein	Brachypodium distachyon	unclassified	N	nucleus	3303.59	4312.4	679.571	1980.12	2568.92	2130.05	2086.05	2085.18	2112.38	2103.41	1288.06	1422.24	1670.48	906.629	1321.85	13694.6	8374.65	15199.1	16401.2	13417.4	3738.1	6429.26	11606.4	8479.35	7563.27
Bradi1g74350.1	2.56153e-08	4.54672e-07	0.999566	0.999957	0.0309108	3.65234e-09	35.7075	0.523406	0.523406	0.734715	10.2807	35.7075	MEHAVLPVPGRVKEEWSPEEEEEAPRPMEGLHETGPPPFLTKTFDLVADPATDGVVSWGRAGNSFVVWDPHVFAAVLLPRSFKHNNFSSFVRQLNTYGFRKIDPDRWEFANEGFIRGQRQLLKMIKRRKPLPYLPSSQQQVLGSCLEVGQFGMDEEIEILKRDKNALLAEVVKLRHDQQSTRADMRAMEERLHLAEQKQLQMMGFLARAMQNPDLFLQLIEQQDKWKDDASLKRRRSIDMAPFLSPREATQNEQHKSTILSEPREFAVPNQPGFSELENLALSIQGIGKGTKDDKGCQNQVSGEVELTDDFWEELLSEGMKDESGMPEPETRRPRYVDA	heat stress transcription factor A-2d-like	Brachypodium distachyon	transcription	N	nucleus	57.5712	648.991	2288.26	380.769	843.898	248.12	13.3046	679.262	826.118	441.701	85.1876	528.362	639.279	1227.27	620.024	10627.5	6116.51	8108.8	9850.72	8675.88	23099.9	23769.6	39299.1	34365.4	30133.5
Bradi1g74370.1	7.61154e-09	1.8669e-07	0.999999	0.955223	1.68443e-10	1.87841e-05	376.668	1.99836	1.99836	17.6544	376.668	207.723	MGMQCMVTEVGDATAARAEVMGLWRRAARDELRRWRVAADEMVLRRRVAEMGCGGGDGGSGGGAGRPNLALPRRRVAGWDLGWERRQGSPNGESGLGRRSVDRDEETRQPKTETHHAREEQYGLMGRKISPINQKTWIFLTEQRPVGQLAQAGCTERSNGHKCSEVEIVRSETLMA	unknown protein	Brachypodium distachyon	unclassified	unknown	unknown	0	0	241.67	22.5574	66.0569	368.789	159.232	0	0	132.005	1777.89	901.308	1080.36	905.215	1166.19	30551	22993	16921.3	29060.6	24881.5	14402.1	12062.1	16437.2	11984.7	13721.6
Bradi1g74420.1	1.43052e-06	9.94728e-06	0.851376	0.384489	1.29136e-06	0.111514	3.26133	0.556498	1.22519	0.556498	3.26133	1.66579	MGGSSEENKKKNVNGSGAGETMRAAPRVPVPEARPFLDTFRANLKETFFPDDPFRSVVRERGFGRRAMAALRYFFPFLEWIPSYRLGAFKSDLISGITIASLAIPQGISYAKLANLPPILGLYSSFVPPLVYAMMGSSRDLAVGTVAVASLLIGSMLGAEVSPTENPALYLHLAFTATFFAGVFQASLGILRLGFIVDFLSHAAIVGFMAGAATVVCLQQLKGMLGLEHFTTSTDLVSVMRSVFSQTHQWRWESVVLGSGFLFFLLLTRFFSKRRPKLFWISAAAPLTSVILGSVLVYLTHAENHGIQIIGYLKKGLNPLSVTSLNFTPPYMMLAVKTGIITGVIALAEGIAVGRSFAMFKNYHIDGNKEMIAIGTMNVLGSFTSCYLTTGPFSRSAVN…	sulfate transporter 3.1-like	Brachypodium distachyon	transporter	Y	PM	56312.7	30567.2	32263.7	29169.6	37078.3	29250.4	27430.4	66687.9	58342.6	45427.8	21832.4	25184.2	18087.1	17432.3	20634	89221.5	128871	129784	135822	120925	75590	49651.6	63992.7	57824.9	61764.8
Bradi1g75590.1	2.60614e-11	6.47397e-09	1	1	4.02567e-13	1.5199e-13	58975.5	0.0232273	0.0232273	0.150563	54678.4	58975.5	MPRFLQSPLPLTEAAAAAAHAALLALALLLLLLRAARALASRCASCLKPHRRGPAADAAAAAASSSSTGAWYRAALACCGYALLVQAGALGYEVAAAGPRVAVEALLLPGVQALAWATLLALALQARAGGWGRFPALVRVWWVVSFALSVAIAYDDSRRLMGDDASKVDYAHMVANFATLPALGFLCLVGVMGSSGVELDFSDATGVHERLLLGGQRRDAEEEPGCLRVTPYGDAGIVSLATLSWLSPLLSVGAQRPLELADIPLLAHKDRSKFCYKAMSSHYERQRTEFPGKEPSLAWAILKSFWREAVINGTFAAVNTVVSYVGPYLISYFVDYLSGKIAFPHEGYILASVFFVAKLLETLTARQWYLGVDIMGIHVKSGLTAMVYRKGLRLSNASR…	ABC transporter C family member 5-like	Brachypodium distachyon	transporter	Y	PM	14.4245	1.09079	4.36998	0	4.97132	0	0.46188	0	0	0.11547	0	0	2.95612	0.0378576	0.748494	276169	223859	299664	287602	271824	224676	286160	348816	313092	293186
Bradi1g75750.1	0.000201596	0.000520316	0.999962	0.996797	0.0152771	0.000688899	14.0537	0.314999	0.778668	0.314999	9.94343	14.0537	MICAISGEVPEEPVVSKNSGLLFERRLIERYIEDHGKCPVTKDELAMDDLVAVKTNKITKPRPLQAASVPGLLGMFQNEWDALMLSNFALEQQLHTSRQELSHALYQHDAACRVIARLKKERDESRTLLAQAERQIPISAAGAAPVAVVTNGKIALDDEVGPDGKKMRPGINPVMIDELTECNSMLSAQRKKRQVPPSLASIDALERYTQVSSHPLHKTNKPGILSIDIHHSKDIIATGGIDTNAVLFDRPSGQVLCTLTGHSKKITSLKFVPWDELLITGSADKTVRIWQGSEDGNYGCRHTLKDHNAEVQAVTVHATQKYFVTASRDNTWCFYDISTGSCLTQVGEASGQDGYTAAAFHPDGLILGTGTSEAVVKIWDVKTQSNVAKFDGHVGAVTA…	U-box domain-containing protein 72-like	Brachypodium distachyon	protein destination and storage	N	nucleus	2212.94	1162.13	3032.9	5047.91	2863.97	0	3100.99	2116.39	3702.96	2230.08	0	0	1020.8	2587.79	902.148	24509.7	15036.5	31628.7	42736	28477.7	9962.05	42104.8	57201.8	51728.9	40249.4
Bradi1g76330.1	0.00848604	0.013612	0.00921858	0.979586	0.0314706	0.741392	1.70895	1.08295	1.70895	1.08295	1.58636	1.18974	MDPYKHRPSSSFNGPMWSTNSGAPVWNNDNSLTVGPRGPILLEDYHLVEKIANFDRERIPERVVHARGASAKGFFEVTHDISHLTCADFLRAPGVQTPVIVRFSTVIHERGSPETLRDPRGFAIKFYTREGNWDLVGNNFPVFFIRDGMKFPDMVHSLKPNPKSHIQENWRILDFFSHHPESLHMFTFLFDDIGIPADYRHMDGSGVNTYTLVNRAGKSHYVKFHWKPTCGVKSLLDDEAVTVGGTNHSHATKDLYDSIAAGNYPEWKFYIQIIDPDHEGRFDFDPLDVTKTWPEDIIPLQPVGRLVLNRNIDNFFSENEQLAFCPGIIVPGIYYSDDKLLQTRIFSYSDTQRHRLGPNYLLLPANAPKCAHHNNHYDGTMNFMHRDEEVDYFPSRFDP…	Catalase	Brachypodium distachyon	disease/defence	N	cytosol	39826.9	44574.9	37171.7	41689.7	40815.8	62491.5	98634.1	63278.9	54603.7	69752.1	48579.6	45346.3	48710.9	34169.1	44201.5	58621.8	79458.3	53135.2	67778.1	64748.3	47051.9	56143.9	37084.9	53959.9	48560.1
Bradi1g76470.1	0.00564886	0.00952539	0.0384386	0.0375351	0.0010035	0.0581595	1.65794	1.37122	1.40181	1.40359	1.65794	1.37122	MAAHAALAASRIPTGRLQHGKAASSKLQRLDLADFSGLRPGSCSVSVAATREASFSDVLGAQLVARASGENAVRAPAEAKLKVAINGFGRIGRNFLRCWHGRENSPLEVVVINDSGGVRNASHLLKYDSMLGTFKADVKIVDNETISVDGKNIQVVSNRDPLKLPWAELGIDIVIEGTGVFVDGPGAGKHIQAGAKKVIITAPAKGADIPTYVLGVNEEGYDHDVANIVSNASWTTNCLAPFVKVLDEEFGIVKGTMTTTHSYTGDQRLLDASHRDLRRARAAALNIVPTSTGAAKAVALVLPQLKGKLNGIALRVPTPNVSVVDLVINTAKTGITADDVNAAFRKAAAGPLNGILDVCDEPLVSVDFRCSDVSSTIDASLTMVMGDDMVKVVAWYDNE…	Glyceraldehyde-3-phosphate dehydrogenase	Brachypodium distachyon	energy	N	cytosol	459823	386367	494708	603922	486205	711792	854277	602308	557901	681569	690588	731806	618274	689055	682431	811265	970593	763547	678989	806099	589694	647225	714725	715124	666692
Bradi2g02420.1	0.00338759	0.00612581	0.706211	0.999402	0.00722181	0.0123899	2.20234	1.05385	1.32993	1.05385	2.20234	2.11467	MAVMRQRARAAKSLWLLVRRLLCRKRQRPEQLEEGEKSSLLLLGRSSSLEELLGSDGVCRCASTPCCCGGAKKKDGQQARQRVDVARPEAEAEAMATTTALSAGGGGGAAGQYRRFMFGGFRRRLMARRQWRPMLVAIPE	uncharacterized protein LOC100834091	Brachypodium distachyon	unclassified	N	mitochondria	1513.4	1542.39	800.541	1025.06	1220.35	1847.2	1335.67	2124.3	1184.74	1622.98	1387.27	1136.19	1649.4	971.37	1286.06	1560.45	3027.85	3132.03	3030.13	2687.62	2938.96	3362.79	1573.3	2447.49	2580.63
Bradi2g02822.1	2.10442e-05	7.8639e-05	0.999951	0.996773	0.000165154	0.000547639	1.88068	0.986068	0.986068	1.04045	1.88068	1.80244	MGEVAAAEMYTQDGTVDLKGNPALKENTGNWRACPYILANECCERLAYYGMSTNLVNFMKDRLGMENALAANSVTNWSGTCYITPLIGAFLADAYLGRFWTIASFMIIYILGLGLLTMATSVHGLVPTCTGGTCSPTSGQTAAVFVALYLIALGTGGIKPCVSSFGADQFDEHDALERRSKSSFFNWFYFSINIGALVASSVLVYVQTHVGWSWGFGIPAVVMAIAVGSFFVGTPLYRHQRPGGSPLTRVAQVLVAAARKWSLPLPEDPSALHETADKESGIEGSRKLEHTPQFAFLDRAAIETDSDKKSASSSPAPASSSWRLCTVTQVEELKSVVRLLPIWASGIVFATVYGQMGTLFVLQGNTLDASMGPHFKIPSASLSIFDTLSVIAWVPVYDK…	peptide transporter PTR5-like	Brachypodium distachyon	transporter	Y	PM	67969.6	38296.6	44318.2	55782.5	51591.7	57721.5	55942.3	47058.4	42769.6	50873	55253.1	59138.7	51263.2	49059.9	53678.7	90360.9	89353.5	110385	98009.4	97027.2	117295	87087.2	74002.8	93578.3	92990.7
Bradi2g03290.1	3.07397e-10	2.07339e-08	0.997806	1	0.00299857	3.9746e-14	18.4879	0.734757	0.734757	0.973687	5.76962	18.4879	MAQLLHHQDSAFYGKEIPGRRWSIFQFFGLSRRLRSVKMLSEKKHGQDKSPGGSKRRSYVTLKDEDSGVMDDSKNAEVKGKQKGSKKNSGKSSLKSLIAKKLYGKEGEKEKMLPVAPKLLRTLSMHYLERNEYVLDGEAATNGNGSSHGAKMLLQQALSNTLEGSDTDKSSSLLLNRGDEHAKQKSHRSISMDGILHKVPYGHKVSGNKIGEELPRSASVTYDRDGLKPYIGRASKRHVNQGFQRSRSLSESLESYSLLLDSISSSEAKRVLTSSKSTRDHSLDGPGANAFHRTSSSQFRSKGLTTLAEHLVMKVDASESHVADKTVGDGDVNFAVDESSCNQFSDGSKNPVLLEEYLHDKSFHVEVSTEADLCIAPLPSEEHAATCDDDQAPSSTKEV…	DUF4378 domain-containing protein	Brachypodium distachyon	unclassified	N	nucleus	237.143	1051.94	1054.16	1708.46	1012.92	930.31	571.602	581.665	893.439	744.254	1111.8	1080.36	1010.09	742.833	986.272	6668.85	3666.06	5531.13	7510.72	5844.19	14675.9	18018.9	22252.9	19959.7	18726.8
Bradi2g04070.1	6.09222e-10	3.38445e-08	2.5144e-05	0	3.85675e-07	7.92127e-08	7.49208	3.38539	3.38539	7.49208	3.99921	4.3132	MGNSIYRFLCGVCSDLCSAASESAYQPHGAHAAVAALGRDILHFQRTKQVPEGLSRHVVSSQNAQANWYKKLQVAWKKARPAPTTPEDAARLVVLTLKNHQKADVEGLLAFYGLPHPNAASAAPPPPSSAAPAPAHHAGPAHKPPGVKFELHTLPVDAKAVADGDTITVYVDTSGEPGSVPGDIKKAAAERTKLRAARNYPKADALQKTMADAGYRQVPNAKGQEVLAKKYRIRLSGIDAPESAMPYGKEAKEALLKMVEGKPLTVHVYDTDRYGRSVGDIHCNGVFVQEQMLKKGFAWHYTAYDKRPELAKWQKQAQDGRKGLWASSRPQEPWEYRKAKRNGTA	probable staphylococcal-like nuclease CAN1	Brachypodium distachyon	growth/development	Y	PM, nucleus, cytosol	82479.6	78491.9	111256	86237.2	89616.2	304867	339044	277324	292310	303386	636019	804471	613295	631862	671412	353073	354163	334902	391439	358394	423518	344838	412119	365655	386533
Bradi2g04380.1	0.0153071	0.0227666	0.999855	0.999713	0.0173562	0.999742	5.389	0.820173	0.844672	1.18474	5.389	0.820173	MGGRNIGVAVDFSSCSKAALRWASTNIIRNGDQLILIHVNNSYQNEQGAVHLWEQSGSPLIPLVEFSDPHVTKTYGLSPDKETLEILAHVANQRGVEVFGKIFYGDPTKKLCEAVDVVPLSCLVIGSRGLSTLKRALMGSVSTYVVNHATCPVTVVKENA	universal stress protein A-like protein-like	Brachypodium distachyon	disease/defence	Y	PM	6264.75	11407.3	11576.6	20382.2	12407.7	19295.7	9363.45	5777.44	7485.15	10480.4	15184.1	26708.6	7902.48	9004.49	14699.9	102324	117849	34674.5	12613.1	66865.1	6000.06	11287.5	15500.3	7918.05	10176.5
Bradi2g09720.1	2.47225e-06	1.54776e-05	0.999997	0.999984	2.90979e-06	0.000723369	148.298	1.91217	1.91217	2.33622	148.298	100.091	MSDQMDSGIKLFGRVIPLAPEAASGPPEADAAAGSDHPPPPPPPPPPPPELQTAAPAEEAEEEAHKDQHKETEDKEDSEMKVDVPPEKENRGIEGDAPREKEGNEMEVDAPQVNENAEPDSSSTLDHKKDTQDQINSAEDKADPKELNEKTANEESDQDKVLKKPDKIIPCPRCNSMDTKFCYYNNYNINQPRHFCKNCQRYWTAGGTMRNVPVGAGRRKSKNSSLHYRQLLMAPDCMMGSRVDISNTVNPEVLASLPTTPTKSTSRNETVLKFGPEVPLCESMASVLNIEEQNVINAGSVPIGEAREVNSCASSMTSHNGLPENAVHVDKNGAPVYCGGVGPMPPYYLGAPFMYPWSIGWNNLPVMVPGGSMSESASPSESCSTSSAPWMNSPMMPGS…	dof zinc finger protein DOF3.3-like	Brachypodium distachyon	transcription	N	nucleus	0	179.826	0	185.728	91.3886	210.368	201.311	69.0996	218.223	174.75	230.873	168.47	139.197	315.475	213.504	8617.94	10242.3	14154.2	21196.6	13552.8	7558.51	11275.4	8917.78	8836.85	9147.13
Bradi2g09760.1	3.30817e-07	3.21501e-06	0.00161426	2.17624e-10	0.000166407	3.49737e-05	28.9659	12.166	12.166	28.9659	14.7932	18.1439	MSFLWKSSNGGTTEKTMTVEEQQQKIDELRKQLGEPSSVAIQGFLSDASILRFLRARNWNVQKASKMLKAAVKWRAAYKPEMISWEDIAHEAETGKIYRADYKDKLGRTVLVLRPGLENTTSGKEQIKYLVYSLEKAIMNLTDDQEKMVWLTDFQGWTMGSTPLKVTRETVNVLQDCYPERLGLAILYNPPRLFESFWKIVKPFLDHETYKKVKFVYSDDKESLKIMAEVFDVDKLDSAFGGRNPATFEYNSYAEQMKQDDKKMQSTDAGSDASSEASFYSGSDSPKHGSAEQVAAKNG	phosphatidylinositol transfer protein 3	Brachypodium distachyon	intracellular traffic	Y	PM	2143.91	0	484.312	0	657.055	10024.3	11073.5	5213.7	5663.33	7993.7	16469.4	23489.6	16961.8	19207.8	19032.2	8998.09	12193.7	9639.46	8048.47	9719.92	11656.5	13295.9	13541.8	9191.83	11921.5
Bradi2g11030.1	1.30057e-08	2.78487e-07	0.996268	0.577108	5.75423e-09	3.96384e-08	74.5365	2.97105	2.97105	9.97601	74.5365	72.2091	MGIAMSRDRQDGRLLSLLALQVLLDYGRAGATRPPVTAALLAANTLLYLRPGNLDALLPRLPRVLFNPHLIIEFGDLRRFLFSVFFHTSEPQFVMNMSSLLWRGGRLEEYMGSFEFASMVASLIGLSQGFTLLLSKGLLLLGDGTAYYQYSSGFSGVLLGMQVLNARAGDIVLFGVCIPAKYAELAQLFLMQALIHEVNIVGNLSGILAGLTYLWLKNGPDPLSDIANVVSRSVRFARGIVRSAARRCQSCSGRRVFASVQREVGQDLVDGFELSPQVVTVVQGSPAGGGPLIPQARYRSPPGASTTIVEMNKALAFAATSSFAPSTPDLSALLADALSGGCSSLHISPGPGNRHLLPWSPWLETSLHSSLIRNKLHELLSRLALASHTETLQDDAA	uncharacterized protein At3g17611-like	Brachypodium distachyon	unclassified	N	unknown	709.296	1273.48	1271.57	796.48	1012.71	5821.58	3867.34	1141.63	1204.65	3008.8	10188.3	9515.01	13495.3	7212.49	10102.8	80828.1	53385	77472.9	90248.3	75483.6	57930	58698.1	92387.8	83490.6	73126.6
Bradi2g11290.1	0.00207002	0.00398922	0.999942	0.999866	0.00268048	0.327801	19.3193	0.508447	0.601859	0.508447	19.3193	8.10824	MRRTKKRGGGLAGRSHKSTTPPNGDLHEENWTRLSDDDFARRLHKSIRGCNGSGKITESMALGDLHGDSNRYDWTRLSDELKSSLSRSVVSLALCNGDTVLFACSSIAVDCQENHTRFLTSATLARAFISGDKRKFHDNLKIKVRHEGNEVYEGVLSEYDLYHNFAIVIINTSLDVHVGLFKHRVENRPHGMVLALARGISGTLIPTNVILASEDHDAHCQMSEVLEGGPLFTFDGNFVGMNLFLVIVKAYFVSRSSILDWLNCKSLQKKTYLPRSKSLKAARFGSRLTCDKLNGHSEVQRPIHRDDMTSGYCRDLESLGYPQPQIDMVDDGMILVNTFEDPFGDAYPEGVWHEFSKSASSDIDRYVVALASFKGWKRHFACTGFFIEWNGSTTILTSA…	uncharacterized protein LOC100821910	Brachypodium distachyon	unclassified	Y	unknown	6745	5279.49	4296.98	3373.4	4923.72	2602.84	1781.64	4226.95	3242.11	2963.39	2704.24	1751.38	2924.48	2633.7	2503.45	185286	52629.5	69069.6	73506.8	95123	12388.7	19504.5	75020.2	52777.4	39922.7
Bradi2g12067.1	2.93347e-06	1.75878e-05	0.992715	0.995408	0.00236338	5.05696e-06	16.8162	0.298715	0.298715	0.379258	10.4272	16.8162	MAMAPPATSTCATALHLPHPSPPLGSSVCGDGRLQFRRRRCLALQRRGGGGHVARAALGGLLGGMFGGGGGDDGETARRKYADTVVLVNRMEPEVSALSDADLRARTAALQERARAGESLDSLLPEAFAVVREASKRVLGLRPFDVQLIGGMVLHKGEIAEMKTGEGKTLVAILPAYLNALSGRGVHVVTVNDYLARRDCEWVGQVPRFLGLQVGLIQQNMTPEQRRENYLCDITYVTNSELGFDYLRDNLAMTVDELVLRNFNYCVIDEVDSILIDEARTPLIISGLAEKPSDRYYKAAKIAEAFEQDIHYTADEKQRNVLLTEQGYADAEEILDINDLYDPREQWASYVLNAIKAKELFLRDVNYIVRSKEVLIVDEFTGRVMAGRRWSDGLHQAIE…	protein translocase subunit SecA, chloroplastic-like	Brachypodium distachyon	intracellular traffic	N	chloroplast	369.292	6.06396	59.9054	1.56404	109.206	72.0099	45.9183	0.0753843	12.4829	32.6216	0.591261	9.17251	135.761	20.1444	41.4174	1455.26	690.815	1798.46	610.349	1138.72	1734.81	1232.47	2231.29	2147.18	1836.44
Bradi2g12120.1	1.22079e-05	5.08284e-05	0.995534	0.936112	0.00510364	2.45483e-05	3.90679	1.11609	1.11609	1.24466	2.61005	3.90679	MMESPSSSPTLQDHLSVTTGPLHLKVWEVVCIALGAFMVVVFFLTVWFTIRSRKRIRRASANIPVTQIPAISKEIKEVRVEQVPASDFGAHDGVLLTFQDKAGDRESDKDKVMVHLGVSKSRRGDESNSGSFRYMDKDAGFQSAEEGGSGTFRQTSAHAITAPSPLVGMPEFSYLGWGHWFTLRDLELATNRFSKDNIIGEGGYGIVYRGEIVNGTPVAVKKLLNNLGQAEKEFRVEVEAIGHVRHKNLVRLLGYCVEGTQRILVYEYVNNGNLEQWLHGGMSHRGSLTWEARIKILLGTAKALAYLHEAIEPKVVHRDIKSSNILIDDDFDAKVSDFGLAKLLGAGKSHVTTRVMGTFGYVAPEYANTGLLNEKSDIYSFGVVLLEAITGRDPVDYGR…	probable receptor-like protein kinase At5g18500-like	Brachypodium distachyon	signal transduction	Y	PM	47093.3	49960.7	55436.1	42536.2	48756.6	52875.9	61607.7	43883.8	59300.4	54417	51232.5	67188.7	56674.4	67645.5	60685.3	142109	101104	135346	130471	127257	116686	167377	250124	227740	190482
Bradi2g12520.1	2.18064e-07	2.35334e-06	0.000237585	2.32445e-07	5.4923e-08	1.26556e-06	5.59363	3.56435	3.56435	5.2314	5.59363	5.23276	MSFSTTAAVVGGTARSDAIRPADLRFCGLRREAFGLRLLRSSPQAAAAKRMVLAAEATGNGAAGSGGFDYDLVIIGAGVGGHGAALHAVEKGLKTAIIEGDVVGGTCVNRGCVPSKALLAVSGRMRELQDEHHMKSLGLQVSSSGYDRQSVADHANNLASKIRSNLTNSMKSLGVDILTGFGTVVGKQKVRYGKVGFPDNEITARNIIIATGSVPFVPKGIEIDGKTVFTSDHALKLESVPDWIAIVGSGYIGLEFSDVYTALGSEVTFVEALDQLMPGFDPEIAKLAQRILINPRKIDYHTGVFASKITPAKDGKPVLIELIDAKTKEHKETLEVDAALIATGRAPFTKGLGLENINVVTQRGFIPVDERMQVTDADGNVVPNLYCIGDANGKLMLAH…	Dihydrolipoyl dehydrogenase	Brachypodium distachyon	energy	N	mitochondria	14070	17173.5	5438.77	9825.21	11626.9	34233.8	48536.4	36767.9	46230.8	41442.2	59792	58209.8	74090	51207.5	60824.8	69778.5	65693.5	70475.4	54198.6	65036.5	72015.2	61040	56872.7	53434.6	60840.6
Bradi2g12560.1	8.73407e-06	3.92742e-05	0.988639	0.132215	0.000115272	0.196577	1.82388	0.705097	1.04796	0.705097	1.82388	1.26369	MAIRQISRQTLALLFVVAAASFAALVFADGDDVVVLTEGTFEKEVGQDRGALVEFYAPWCGHCKKLAPEYEKLGASFKKARSVMIAKVDCDEHKSVCSKYGVSGYPTIQWFPKGSLEPKKYEGQRTAEALAEFVNKEGGTNVKLATIPSSVVVLTPETFDSVVLDETKDVLVEFYAPWCGHCKHLAPIYEKLASAFKLDDGVVIANVDADKYKDLGEKYGVTGFPTLKFFPKGNKAGEDYDGGRDLGDFTKFINEKCGTSRDTNGQLTSEAGRIASLDTLAKEFLSVASDKRKEVLSSIEEEVAKLSGSAAKHGKVYVTIAKKILDKGNDYTKKETERLHRILEKSISPSKADEFIIKKNVLSTFSS	protein disulfide isomerase-like 2-2-like	Brachypodium distachyon	protein destination and storage	N	ER	6898.05	8348.13	6968.16	5581.94	6949.07	6231.99	7878.84	7396.23	7622.24	7282.32	6297.84	4456.25	4132.36	4712.63	4899.77	11768.4	13059.5	15595.3	10273.7	12674.3	9271.05	8279.72	9817.82	7757.21	8781.45
Bradi2g12790.2	1.45547e-05	5.82621e-05	0.994835	0.000166454	6.5474e-05	0.00581909	1.70759	1.03224	1.03224	1.64235	1.70759	1.42504	MDMADIEAGTVSTDSNSSRRSQDDTATLIPNSGNLEGSSHRATKTTRFKDEDEVVEITLDVQRDSVAIQDVRAVDDGGSGHGGGFDGLSSSSSRGGKLSSKFRQVTNGLKLKNPSKKVPQAPAPKTVRKRFDRSKSTAAVALKGLQFVTAKVGNDGWAAVEKRFNHLQVDGMLLRSRFGKCIGMEGSDEFAMQMFDSLARKRGIVKELLTKDELKDFWEQLSDQGFDNRLQTFFDMVDKNADGRITAEEVKEIIALSASANKLSKIKERADEYTALIMEELDPNNLGYIELEDLEALLLQSPSEAVARSTTTHSSKLSKALSMKLAPSKDTSPFRHYWQELLYFLEENWKRIWVVTLWLSICVVLFIWKFIQYRNRAVFHIMGYCVATAKGAAETLKFN…	respiratory burst oxidase homolog protein B-like	Brachypodium distachyon	disease/defence	Y	PM	242306	208275	260623	204408	228903	199633	252245	217040	276211	236282	376375	329543	379048	418793	375940	338684	352049	432002	440756	390873	346216	336937	297663	323966	326196
Bradi2g15630.1	0.00869391	0.0138794	0.925529	0.130864	0.0195675	0.940733	2.02008	0.804849	0.804849	1.69822	2.02008	1.18177	MLVRLGFVVVASVAAFTLKRGRGPNKDNGQARKRKDKARSSEHGEKEEEKEEVKTISGIINSVEDDDDDMFSEIESLLSGEIDIPIPSDRFDVKERSRYNAHMANNGAEMERLRGLVRELEEREVKLEGELLEYYGLKEQETDVTELQKQLKIKTVEVDMLNITISSLQAERKKLQDDVVRGAATKKELEASRSRIRELQRQIQMEANQTKGQLMLLKQQVMGLKAKEEEVAKKDAEIEQKLKKLKELEVEVLELRRKNKELLYEKRDLIVKLDAAQGKITESDVVAHAREEISNLRHTNEDLTKQVEGLQMNRFSEVEELVYLRWVNACLRFELRNYQTPSGKISARDLNRTLSPKSQARAKQLMLEYGSERGQGDTDLDSASSAPSSPRSEDFDTVS…	protein CHUP1, chloroplastic	Brachypodium distachyon	cellular structure	N	chloroplast	4322.94	3103	3502.91	2266.48	3298.83	3245.49	4213.91	1579.28	1581.56	2655.06	7713.1	7038.37	4062.38	3594.77	5602.16	5791.45	8128.38	7017.38	5718.36	6663.89	4279.78	1917.69	3415.27	5981.13	3898.47
Bradi2g16480.1	0.000845541	0.00182794	0.936423	0.999988	0.00533333	0.0194183	2.28886	0.805136	0.805136	1.02059	2.28886	2.06648	MAYRAEDDYDYLFKVVLIGDSGVGKSNLLTRFTRNEFSLESKSTIGVEFATRSIHVDDKVVKAQIWDTAGQERYRAITSAYYRGAVGALVVYDVTRHVTFENVERWLRELKDHTDANIVIMLVGNKADLRHLRAVQSEDAKAFAERENTFFMETSALEAMNVEDAFTEVLSQIYRVVSKKALDIGDDPAAPPKGKTISVGSKDDVSAVKKSACCSS	ras-related protein RABA1f-like	Brachypodium distachyon	transport, signal transduction	Y	PM, endosome	12647.5	12355.7	13022.6	12644.7	12667.6	7204.89	10420	10607.2	12564.5	10199.2	13951.8	14595.3	10862.9	12303.6	12928.4	32766.2	25809.9	25707.3	31694.2	28994.4	18513.2	18310.8	44534.2	23351.5	26177.4
Bradi2g17272.1	5.23848e-08	7.51777e-07	0.0278909	0.0128636	6.66367e-09	3.33897e-06	1.77596	1.19838	1.19838	1.22448	1.77596	1.49655	MTVIDILTRVDAICQKYDKYDVDKLNGANVAGEDPFARLYGSVDAEISQCVEKAELAKQEKNRAAVVALNAEIRRTKAKLLEEDLPKLQRLALKKVKGLTREELATRTDLVTALPDRIQSIPDGSATATKKNGTWGGASGSRTGGGIKFDSTSDGNFDDEYFKGTEESNKFRQEYEMRRMKQDEGLDVIGEGLATLKNMASDMNEELDRQVPLMDEMDDKVDRANADLKNTNVRLKQTILQMRSSRNFCIDIILLCVILGIAAYLYNVLKK	syntaxin-71-like	Brachypodium distachyon	intracellular traffic	Y	PM	198664	204231	248712	222012	218405	274878	272700	254251	245099	261732	254920	276512	270160	268136	267432	383693	356951	376650	434223	387879	340751	319553	334061	313056	326855
Bradi2g17680.1	1.57189e-10	1.17805e-08	0.998758	0.993255	1.14997e-12	2.5735e-11	5.63405	1.0696	1.0696	1.10819	5.63405	5.33225	METPAVIAVVENGFVGVERKVQKSYWEEHSRDLTVESMMLDSRAKDLDKEERPEVLSILPSYEGKTVLELGAGIGRFTGELAKEAGHVLALDFIDSVIKKNEEINGHIHNNITFMCADVTSPELKIEDNSIDLVFSNWLLMYLSDEEVEKLIGRIVKWLKVGGHIFIRESCFHQSGDSKRKVNPTHYREPRFYTKIFKECSSYDQEGNSFELSLVTSKCIGAYVKSKKNQNQICWLWEKVKSTDDKGFQRFLDNVQYKSSGILRYERVFGEGYVSTGGFETTKEFVDKLDLKPGQKVLDVGCGIGGGDFYMSETYDVHVLGIDLSINMVSFAIERAIGRKCSVEFEVADCTTKEYPENTFDVIYSRDTILHIQDKPALFRNFFKWLKPGGKVLISDYCR…	phosphoethanolamine N-methyltransferase 1-like	Brachypodium distachyon	metabolism	N	unknown	30560	40575	46399.5	41526.1	39765.2	51965.3	47931.4	27562.7	42672.2	42532.9	46001	42736.7	31246.9	56284.3	44067.2	250444	214905	205834	224972	224039	182295	179865	240435	245557	212038
Bradi2g18200.1	0.0215873	0.0305844	0.999986	0.999931	0.0247149	0.259313	2.5508	0.967787	0.967787	1.04822	2.5508	1.90109	MDGFGWSTQQTPPGAASCPKDDALLAAFLGGASTTFELLHSAAAGISDDAYGHELPPSCQDDDILRRLLRCRDSVNSPLPSAVDVPSKAAILHNSAGSLRAPAPPIGQHDSSFAFFPNAGDAFSGHSTATGNISSGDSNTHDAEVASPPCIVPATRTTTGTEAMAQAKQEAIIYRAAAAAYSSSPAAAAGADPPLGPRRRRRNVRISSEPQTVAARLRREKVSERLRALRRLVPGGGSGKMDTASMLHQAACYLSFLKAQLARFQAMAAADGRASYSSNSSSMQRYDNPPESLGGGNIGNGGAVLSFRRDDSVDGYVRGNNWNMQSL	transcription factor bHLH87-like	Brachypodium distachyon	transcription	N	nucleus	52468.6	18751	34198.3	46422.7	37960.2	26786.7	39755	24076.7	56331	36737.3	23691.2	69254.5	38003.7	28212.4	39790.5	50320.4	116149	80987.3	139859	96828.9	30756.3	95923	105923	56059.6	72165.6
Bradi2g21510.1	2.58957e-06	1.59513e-05	0.35761	0.617456	6.32076e-05	0.000100536	1.67474	0.819933	0.819933	1.13091	1.67474	1.66001	MSSIGTGYDLSVTTFSPDGRVFQVEYAGKAVDNSGTIVGIKCKDGIVLGVEKLITSKMILEGSNRRLHSVHRNSGLAVAGLAADGRQIVSRAKSEAANYEKVYGEPMPVKELADRVASYVHLCTLYWWLRPFGCGVILGGYDRDGPQLYMIEPSGLSYKYFGAALGKGRQAAKTEIEKLKLSELTCREGIVEVAKIIYGVHDEAKDKSFELELSWVCDESNRQHEKVPNDLLEQAKAAAQAALEEMDAD	Proteasome subunit alpha type	Brachypodium distachyon	Proteolysis	N	cytosol	60732	61879.8	72354.5	55315.3	62570.4	45615.9	57216.5	47964.7	54417.2	51303.5	73161.3	70047.1	70483.4	69354.1	70761.5	104359	95768.3	103301	115727	104789	83043	93284.5	123643	115498	103867
Bradi2g23130.1	4.23343e-07	3.85872e-06	1	1	6.20163e-06	5.1011e-05	453.478	1.16248	1.8368	1.16248	453.478	341.155	MGGGDWHEGAPPLWEGMGGGGWDVDGLVLSERRCATERLLAPLGGVPQVRCHSEVARAAGSRRTVREVNRECVEDRRFRRRKERQAKLVWRNYVDLHSHDLRGRADSQPGLGLGACDMPRGGFGSLELGSRGCRGGFRQGKIEWRRRGRESFEGRRKAWPGGEEQDDGEGAGEAGGAQQACQRRRGRPSLADGQAAVHAGADQEGNPPSLLRAVGDQVLLLRGPRPRHRGGPSVRGAGEDPHPPERAAAGRLAALLDRAGLRDDRRLGHRARVRPPSLLGLLAPRRHCRPGAAFVAARPILLLEVQPPSPPLQHGLAGARRDVVPKQKESAGVVHPLHLHNPVGRLVHIVVQLTLGWPLYLALNASGRPYPRFACHFDPYGPIYNDRERAQIFISDVGV…	omega-6 fatty acid desaturase, endoplasmic reticulum isozyme 2-like isoform 1	Brachypodium distachyon	metabolism	N	ER	113.781	35.5591	109.654	59.3486	79.5858	52.6299	351.649	58.3011	122.154	146.183	14.6283	216.525	34.9008	104.013	92.517	31173	26398.2	37957.1	48833.2	36090.4	14103.2	24622.3	37435.2	32443.9	27151.1
Bradi2g24690.1	4.58751e-08	6.80061e-07	1	1	2.85106e-08	7.42295e-05	4358.35	0	0	10.8974	4358.35	2899.06	MARNPGCAVFIGNLDEKVPERVLYEILVQVGHVVDLHIPRDKETNRGRGYAFAEYETEEIAQYAVKLFSGLVRLHNRTLRFAISGQDKPSSNANMPVTPKMNPIPLRNPPQLLRSSDTPVSQHRVVNGRIAGYGAPPSHSNDFHAQASSGVASRGLSDGTYEYSRRVFGSVLNDVNRRAPTQPVPYPSY	RRM domain-containing protein	Brachypodium distachyon	transcription	N	nucleus	0	0	0	0	0	0	0	0	0	0	31.0169	12.5726	0	0	10.8974	3742.77	3241.1	4827.47	5622.07	4358.35	2119.78	2437.01	4152.61	2886.84	2899.06
Bradi2g25190.1	0.00308507	0.00565456	0.19024	0.026985	0.000578985	0.0447103	2.41243	1.56439	1.56439	1.86535	2.41243	1.79224	MAKAEGEAAALEFTPTWIVAAICSLIVLISLVAERLIHYLGKTFKKKNQKPLYEAILKVKEELMLLGFISLLLTVFQGMIQDTCIRPSWTVHMLPCQREEEVESTKEHSVTAHIIGRIGRRLLSDGAAGAEHCRKKGKVPLMSLEAIHQLHIFIFVLAITHVVFSVTTMLLGGAKIHQWKQWEDTIQKDTAGNGPKKVTRVHQFEFIKEHFKGIGKDSRILSWIHCFFKQFYGSVGKSDYETMRRGFIMTHCRGNLKFDFHKYMLRVLEADFKKVVGISWYLWVFVVIFLLLNVNGWHTYFWIAFIPLLLLLAVGTKLEHVIAQLAHDVAEKHSAIEGDLIVKPSDDHFWFGRPRIILFLIHFILFQNSFEIAFFFWILTTYGFNSCIMGQVGFIVPRL…	MLO-like protein	Brachypodium distachyon	disease/defence	Y	PM	6223.37	2377.26	5098.54	8145.29	5461.12	9732.64	8798.38	6777.88	8864.38	8543.32	8240.61	11601.2	9589.43	11316.5	10186.9	13203.1	14970.1	16443.7	8081.42	13174.6	10702.2	8923.98	10574.2	8950.21	9787.65
Bradi2g25640.1	0.0193638	0.0278781	0.677864	0.451364	0.0049078	0.547703	6.02739	2.36985	2.36985	2.82654	6.02739	2.62562	MAEEGEEAPPAVEFGLPRELAAVLPTDPFEQLDVARKITSIALASRVGRLEAECARLRAQLAERDDATEDLRERVEQLDSALALATDRLRLAEEEKETLLKENATLSNTVNKLNRDVAKLEVFKKTLMQSLQEDDDNPKIAPRAKLTEASSFNSAPSVGDEHSAFPTSKSSQLSETASSVSEGSSHAEPDVPMPPRSHVYLPSYNSTPKLTPPGSPPRGYAPLSPPRRHSISVASMNRLDDRSSVFSSNHSSMTSPFEAASQTGRTRVDGKEFFRQVRNRLSYEQFSAFLANVKELNAHKQTREDTLRKADEIFGAENSDLYTIFESLITRSHH	uncharacterized protein LOC100842340	Brachypodium distachyon	unclassified	Y	PM	17070.7	7983.88	16893.2	20465.1	15603.2	42437	44590.2	29678.8	31202.9	36977.2	42632	54139.8	39810.2	39830.3	44103.1	88109	183663	52044.7	52370	94046.6	28187.1	51289.6	41907.5	42488.1	40968.1
Bradi2g31910.1	0.00858825	0.013727	0.117226	0.958756	0.0134344	0.0130677	1.57353	1.08661	1.38168	1.08661	1.5718	1.57353	MGEGNGVAWAGALSPAARYAESGGASLTWENLTAVLPGSGGRATKKLLQGLYGYAVPGRIVAIMGPSGSGKSTLLDSLSGRLARNVLQTGKVLLNGKKRRLDFGAVAYVTQENVLLGTLTVRETVTYSALLRLPSSMSKAEVRRVVDDTLDEMGLRECAERPVGTWHLRGVSGGEKKRLCIALEILTRPRLLFLDEPTSGLDSASAFSVIETLRQLARDGGRTVVSSVHQPSSEVFALFDDLCLLSSGESVYFGDAKLAPQFFAETGFPCPSRRNPSDHFLRCVNADFDDVATAMKGSMKLRAEADLDPLLKYSTAEIRERLVEKYRISDYALMVKNTIHEITKIEGVVEEAVKGSQATWCKQLRTLTKRSYKNMYRDFGYYRLRIIIYVLMAICLGTI…	ABC transporter G family member 15-like	Brachypodium distachyon	transporter	Y	PM	767179	604239	699488	779799	712676	948391	872682	1.13052e+06	987174	984691	792493	723802	806143	775165	774401	830663	891181	1.33939e+06	1.41949e+06	1.12018e+06	1.31337e+06	1.23773e+06	995987	938596	1.12142e+06
Bradi2g32300.1	1.55157e-07	1.82006e-06	0.999978	0.999994	7.90053e-05	1.03759e-07	86.4291	0.312147	0.312147	0.503547	59.1908	86.4291	MSASRTPGTPASKIERTQLPTLTPGGSSRSKEEKIFVTVRVRPLSKKELAVKDQVAWDCADSHTILYKAPPQDRAAPTSYTFDKVFGPTCQTDLVYADGAKDVAMSALTGINATIFAYGQTSSGKTFTMRGVTESAVSDIYGHIENTPEREFIIKISAMEIYNEIVKDLLRPESSPLRLLDDPEKGTIVEKLEEEIVKDRQHLRHLISICEEQRHVGETALNDTSSRSHQIIKLTVESKLREVTGCVKSFVASLNFVDLAGSERAAQTNAIGARLKEGCHINRSLLTLTTVIRKLSSEKRSGHIPYRDSKLTRILQLSLGGNARTAIICTMSPALTHVEQSRNTLFFATCAKEVTNTAKVNMVVSDKQLVKHLQTEVARLEAELKTPDRSSSFEILIME…	Kinesin-like protein	Brachypodium distachyon	cell structure	N	cytoskeleton	43.5316	207.415	63.6506	37.1332	87.9325	14.4441	0	95.3473	0	27.4479	0	55.4326	57.6409	64.0389	44.2781	7124.36	5448.43	2837.49	5408.88	5204.79	5026.54	7306.1	8314.8	9752.28	7599.93
Bradi2g34240.1	0.000885656	0.00190247	0.999393	0.924679	0.0128575	0.00248811	2.18258	0.953557	0.953557	1.1726	1.95562	2.18258	MAANGGMVAGSHNRNEFVMIRHDGDAPAPGKQAKGVNGQVCQICGDTVGVSATGDVFVACNECAFPVCRPCYEYERKEGNQCCPQCKTRYRRLKGSPRVQGDEEEEDVDDLDNEFNYKQGNGKGPEWQLHGQGEDIDLSSSSRHEPHHRIPRLTSGQQLSGDIPDASPDRHSIRSPTSSYVDPSVPVPVRIVDPSKDLNSYGINSVDWKERVESWRVKQDKNMMQVTNKYPDARGGGDMEGTGSNGEDMQMVDDARLPLSRIVPIPANQLNLYRIVIILRLIILCFFFQYRVTHPVPDAYGLWLVSVICEIWFALSWLLDQFPKWYPINRETYLDRLALRYDREGEPSQLAPIDIFVSTVDPLKEPPLITANTVLSILAVDYPVDKVSCYVSDDGSAML…	Cellulose synthase	Brachypodium distachyon	cell structure	Y	PM	13044.1	5776.9	8358	4960.86	8034.97	7505.41	8346.78	7081.4	7713.66	7661.81	9199.27	8617.96	6739.1	13131	9421.84	12051.2	12605.7	20654.3	17542.2	15713.4	21904.5	17554.9	17484.5	13203.9	17537
Bradi2g35450.1	2.78875e-06	1.68701e-05	0.999881	0.999924	0.000233625	2.71031e-05	18.6616	0.705486	0.705486	0.737026	16.0119	18.6616	MVAVAAGGRQKMGHEKLIIRREKVRLIDILSMLLLRRPLTSYAFVDASDQTARDLGDAPAGFLFALGQFIVYLLGKAYYPATLIGAALEFLFNLVALNGGLLGIVWNTFRCRLVIPNREAPNYRTMTKMIDGRTELRPTSPGFASDGCLSRLNFLNAASLFGEAADLESGGLAAAQAAPLVQQEYSIIDLTVMAAEMAYENAARVEDVVINCWKLNFVGFYNGWNKYLNNDYWHTETTQAFVMTDTAEDAKFVLLAFRGTEMLNMRDWMTDFDVSRKGMGDMGNVHLGFLKALGLQDEDATDALDAFPREAPPAPPQGKHFSYYQLREVLRKQLEKHPNAQIVVTGHSLGGALAVIFPALLAMHEEKDILDRLAVVVTYGQPRVGDDKFAEYFQAKVVK…	uncharacterized protein LOC100843563	Brachypodium distachyon	unclassified	Y	unknown	3210.91	4073.52	1378.55	4164.55	3206.88	2345.66	2992.36	2612.16	1099.46	2262.41	1901.64	1794.71	3666.78	2091.1	2363.56	24176.1	44844.3	49910.8	86461.3	51348.1	50041.8	67962.4	63035.7	58341.8	59845.4
Bradi2g37630.1	2.39086e-08	4.35848e-07	3.45408e-06	1.37545e-10	5.91903e-10	0.000307835	7.34275	3.82629	4.74997	7.34275	6.50205	3.82629	MPTSGGHVAVDVADPASAAAAASLPPVPYVLSFTDLSYSVKKPRGPTGHLLPPRGSNRLASATDSPFPSSLTPASNTKALLSGISGSAVSGELFAIMGASGSGKSTLLDALAGRISRDSLHGAVSLNGEPLHGRRLRAISAYVMQDDLLYPMLTVRETLQFAAEFRLPRSLPKSKKRARVDALIDQLGLARAADTVIGDEAHRGVSGGERRRVSIGVDIVHDPILLFLDEPTSGLDSTSAFMVVQVLRNIAQSGSVVVMTIHQPSARILAILDKLMLLSRGRTVYAGSPAGLKPFFSEYGEPIPDNENPAEFALDTIRELERQEPHGSSPLAEFNATWQAAHSSLVVPANKAATPMSLEQAIAESVFRGKLVAGSTSSSSTTTSSPSSSVPTYANPLAI…	ABC transporter G family member 1-like	Brachypodium distachyon	transporter	Y	PM	43707.2	37226.7	67807.6	53813.3	50638.7	228442	254950	219616	259121	240532	330326	368649	403803	384532	371828	267269	271469	386681	391602	329256	203349	190943	211411	169331	193758
Bradi2g38120.1	3.07663e-05	0.000109508	0.0851165	0.000111898	0.0284506	1.58387e-05	2.5762	1.54335	1.54335	2.27936	1.67192	2.5762	MAPISRLRRRSSSSPASPMSGLRIPRRQSSSSTTPMSGRRLFSSSSTPMPRLQLLPRRSSSSTSPTSRCWDPQVAFVAAIARVRAGTFSTDDAHHLFDELLRQGTPVHNPALNGFLAALARAPDSVSCSNGPALVLALFNRICREEAGPRVAPLSVHTYGILMDCCCRARRPDLGPAFFARLLRAGLRTRTIEANTFLKCLCHAKRTDEAVDVLLHRMSDLGCVPNAISYNTVIKSLCGDSRSQEALDMVQRMAKEGGRCSPDVVSFNTVIHGFFKQGEVSKACNLINEMVQKGVEPDVVTYNSIVDALCKARAMDKAELVLRQMVDKGVEPDGLTYTAIIHGYSCSGHWKESAKMFRKMTSKGLIPGIVTFNSFMSSLCKHGRSKDAEEIFQYMTTKG…	protein Rf1, mitochondrial-like	Brachypodium distachyon	signal transduction	N	mitochondria	2396.57	1454.17	2196.59	2290.72	2084.51	3102.65	3543.03	2700.63	3522.23	3217.14	4590.02	4148.73	4429.58	5837.06	4751.35	2620.08	3361.27	4014.04	3945.15	3485.14	6083.32	4599.9	4563.86	6233.44	5370.13
Bradi2g38750.1	0.00301842	0.00554748	0.835555	0.206526	0.0010858	0.0966585	3.01269	1.3424	1.3424	1.82338	3.01269	2.0089	MPRGGFSAGSRKLELAVDTGNPLLNRTLDGFIKIGAVGACKVAAEDAFECLHKGNVSTNKLEHTLKKMCKEGAYWGTVAGVYVGMEYGVERIRGRSDWKNALIGGVVSGALISAASNSHRDKIVKDAITGGAIATAAEFINYLT	outer envelope pore protein 16, chloroplastic	Brachypodium distachyon	transporter	N	chloroplast	41939.4	28337.9	23641.8	37906.1	32956.3	47745.3	54862.9	45453.1	28901.2	44240.6	64053.3	69095.9	58979.1	48239.4	60091.9	125458	134082	79420.8	58187.4	99287.1	61402.5	94494.7	54198.9	54727.7	66206
Bradi2g39950.1	0.0184442	0.0267829	0.117825	0.0422682	0.0144623	0.00933017	1.74201	1.4678	1.4678	1.5809	1.69515	1.74201	MAAATSFATIAIARPAAAAQKALLASRPSSSLLSLRGASPATPVAVAGGSHSRARFVTSASAEPKAAELQSKVTNKVYFDISIGNPVGKNVGRIVIGLYGDDVPQTVENFRALCTGEKGFGYKGSSFHRVIKDFMIQGGDFDKGNGTGGKSIYGRTFKDENFKLVHTGPGVLSMANAGPNTNGSQFFICTVKTPWLDGRHVVFGQVLEGLDIVSMIESSETDRGDRPKKKVVISECGELPVV	peptidyl-prolyl cis-trans isomerase CYP20-2, chloroplastic-like	Brachypodium distachyon	protein destination and storage	N	chloroplast	19335.3	19059.3	22252.5	28664.4	22327.9	32694.5	35154.5	32455.9	30786.1	32772.8	34879.8	45396.7	27889.4	33026.9	35298.2	28329.5	49422.6	39560.5	34084.1	37849.2	29746.2	39762.8	38254.9	47817.5	38895.3
Bradi2g42310.1	5.51436e-11	9.24817e-09	0.999966	0.997189	3.57892e-06	3.33067e-16	53.8092	0.750736	0.750736	1.76432	23.894	53.8092	MHRKLPPLPHLALRSSSTSSSASPPPPRRLPPPVPLRDLLAHRLPPPQTPPSRSPPPVHPHAGLLLPRRGEEAAPERLHLELVKRGLTHDLFLSNHLVNLYAKGSRLAAARQVFDGMLERNAVSWTCLVSGYVLSGITDEAFRVFKAMLWEGSEFSRPTPFTFGSVLRACQDAGPDLLAFAVQVHGLVSKTIYASNTTVCNALISMYGNCSVGLPLQAQQVFDTTPVRDLITWNALMSVYAKKGYVVSTFTLFMAMLHDDSAIELRPNEHTFGSLITATSLSSCSSGVLDQVFARVLKSGSSSDLYVGSALVSAFARHGMLDEAKDIFINLKERNAVTLNGLIVGLVKQHCSEEAVGIFMGTRDSFVVNTDTFVVLLSAVAEFSIPEDGLMRGREVHGH…	pentatricopeptide repeat-containing protein At5g09950-like	Brachypodium distachyon	RNA modification	N	nucleus	499.14	595.438	215.84	195.506	376.481	12.1669	207.943	690.955	219.486	282.638	566.742	925.115	707.039	458.032	664.232	9897.26	7655.7	7601.88	10827.7	8995.64	20054.1	19350.4	24745.2	16882.9	20258.2
Bradi2g42360.1	0.000905335	0.00192938	0.999793	0.749979	0.00219406	0.324663	2.08966	0.759669	1.03213	0.759669	2.08966	1.41763	MAAANGEKGFEVPEVEIKYTKLFINGQFVDAASGKTFETRDPRTGEVIARIAEGDKADIDLAVKAAREAFDNGPWPRMPGCARGRILNKFADLVDSHIEELAALDTVDAGKLFMMGKLVDIPGGANLLRYYAGAADKIHGETLKMTRPLHGYTLKEPLGVVGHIVPWNYPTTMFFFKVSPALAAGCTMVVKPAEQTPLSALFYAQLAKQAGIPDGVLNVVPGFGPTAGAAMSSHMDVDKISFTGSTEVGRLVMEAAAKSNLKSVSLELGGKSPIIVFDDADLDMAVNLVNMATYTNKGEICVAGSRIYVQEGIYDAFVKKSIEVAKKSVVGDPFNPHVHQGPQVDKDQYEKVLKYIEVGKREGATLLTGGKPCGDKGYYIEPTIFTDVKEDMAIAQEEI…	aldehyde dehydrogenase family 2 member C4-like	Brachypodium distachyon	disease/defence	N	cytosol	20446.3	10889.8	13181.2	9972.75	13622.5	15803.2	14780.5	13647.2	12009.7	14060.2	9855.69	11733.5	9854.25	9950.88	10348.6	35818.7	29987.2	26480.9	21578.9	28466.4	20172	10055	18483.9	28535.6	19311.6
Bradi2g42380.1	3.01324e-06	1.7851e-05	1	0.674165	0.000142283	9.89868e-05	2.67443	0.697577	1.00364	0.697577	2.61167	2.67443	MGSNEGGACDGKAGSVVVPEIKFTKLFINGEFVDAASGKTFETRDPRTGDVLAHVAEADKADVDIAVHAAREAFEHGKWPRMSGYERGRVMNKLADLMEQHTEELALLDGADAGKLLLLGKIIDIPAAVQMLRYYAGGADKIHGESLRVSGKYQGYTLKEPIGVVGVIIPWNFPSLMFFLKISPALAAGCTVVVKPAEQTPLSALYYAHLAKLAGIPDGVINVVPGFGPTAGAAIASHMDVDSVAFTGSGEVGRLIMEASARSNLKTVSLELGGKSPLIIFDDADIDMAVELSRLAIFFNKGEVCVAGSRVYVQEGIYDEFVKKAVVAAQNWKVGDPFDVTTNMGPQVDKEQFERVLRYIDLGKSEGATLLTGGKPAADKGYYIEPTIFADVKEDMQIA…	aldehyde dehydrogenase family 2 member C4-like	Brachypodium distachyon	disease/defence	N	cytosol	8797.77	8033.69	9156.27	5995.04	7995.69	10278.2	6813.48	8043.35	6964.2	8024.81	5034.7	4015.62	5613.88	7646.26	5577.61	26989.8	18511.7	18068.3	19958.6	20882.1	18649.8	15977.6	22928.3	27980	21383.9
Bradi2g42430.1	3.43762e-10	2.20826e-08	0.999998	0.999999	1.57506e-06	1.31894e-13	358.783	0.0980943	0.0980943	0.130852	185.246	358.783	MAALEREAALLARVAANHLFLAQFEPMRAALLSLRRRADPDLAADFLRAVVASGGRVPGVLWSAPPACPSPSHLAWLAALELAALPSTPNPEALRLKAEFLILLQPIADYPTTGAEAQGTLAKLLDLGVVRLKREVDGQGKAGVGAEEVPVSEEDLRGLSTVVLDNAELFDALCVGVSRQIGLDGGFGANVLLWLRRSVQLAHLDAVKALVMAGDVESAIGHLRFLCLENGVEEDEYKVVLGDLVRKCWERASNYSGTWFESRNRITKMYGATLQSSSPQLVQLIQIILDGILSEEFEDHSVSDAHWMPLPFKKFIETFWLERDADSDDRTILTAAITSCKKDLYHYSRLSGKHVLEVVMETALSLIKREQLQEAVNVVSLFPLLQPLVAVLGWDILKG…	zinc finger-like	Oryza sativa Japonica Group	unclassified	Y	unknown	3.97171	0	769.647	333.681	276.825	104.696	3.92417	0	0	27.1549	0	144.125	0.766729	0	36.223	62434.8	40200.2	44775.5	57712.4	51280.7	72683	110584	113463	100550	99320.2
Bradi2g43150.1	0.000437682	0.00102506	0.288068	0.6706	0.00337057	0.118657	1.83456	0.647428	0.647428	1.21844	1.83456	1.46165	MDREIHRVTSLRRDSSLWRRGDDVFSRTSSRFQQDEEDDEEALRWAALERLPTYDRVRRGMLSVEEGGDKVEVDVGRLGAHESRALIERLVRAADDDHEQFLLKLKERMDRVGIDYPTIEVRFDKLNVEAEVRVGNRGLPTLINSVSNTVEAIGNALHIFPSRKQPMTVLHDVSGIVKPRRMTLLLGPPGSGKTTLLLAMAGKLDKELKVSGKVTYNGHGMDEFVPQRTAAYISQHDLHIGEMTVRETLAFSARCQGVGTRYEMLTELARREKAANIKPDHDIDVYMKASAMGGQESSIVTEYILKILGLDICADTLVGNEMLRGISGGQRKRVTTGEMLVGPAKALFMDEISTGLDSSTTYQIVNSLRQTIHILGGTAVISLLQPAPETYNLFDDIIL…	ABC transporter G family member 37	Brachypodium distachyon	transporter	Y	PM	570206	334139	314064	187617	351506	207608	216198	176025	310470	227575	401829	330507	469421	511404	428290	624682	744150	661612	548987	644858	517117	456407	652314	429280	513780
Bradi2g43690.1	4.34099e-06	2.29647e-05	0.970816	0.473304	1.62397e-05	0.000161065	36.4019	3.27408	3.27408	7.72073	36.4019	28.8612	MEQTPLIPRVRLGTQGLQVSKLGFGCMGLTGAYNTPLDDDAGVAVIAHAFRRGVTFFDTSDVYGPHANEILLGKALKQLPREQVQVATKFGIQRDAAAGKSTVCGRPEYVRACCEASLRRLGLDHIDLYYQHRVDTTIPIEDTIGELKKLVEEGRVKYIGLSEASPDTIRRAHAVHPITAVQMEWSLWARDIEPQIVPLCRELGIGIVPYSPIARGFFGGRGVTQQVSAESSLKGHPRFSAENLEKNKLLYLKMEQLAEKHRCSPAQLALAWVLHQGDDVVPIPGTTKIKNLDSNIDSLKVKLTEDDLKEISSQIREEDVAGGRQYTSFAHTTWNYADTPKK	auxin-induced protein PCNT115-like	Brachypodium distachyon	signal transduction	N	nucleus	224.458	326.078	359.019	318.708	307.066	1285.24	1112.4	857.79	766.011	1005.36	2234.46	2182	3179.04	1887.6	2370.77	9927.87	8818.18	11330	14635.1	11177.8	4971.01	14418.5	7916.18	8143.47	8862.28
Bradi2g47000.1	0.000288748	0.000713408	0.809751	0.000126221	0.00541049	0.0345337	2.99221	1.29763	1.29763	2.99221	2.35174	2.02104	MTLLCLIILLVLSPVASHGDDTYNSRRTPTCQLEPSVCGDLSIKYPFYLYNETEKAPPPEHSYCGYPGLAILCDDDGKPTLRLDRDDYTVSSIDYASLTVSLADADILDGGEACPKAGHNVTIPKAFHLPTSTIAYLFFFTGCAFAPDAEFLPEPKPARKPPSIKPITCAGSSGEAEPTMSFVLPEREVPPKPKGWWQACQSVYRAPVLSDAVPEGAAQDPGWREGGYAKALRGGFQVSWERIGSGPCARCERFDGRCGYNGTGEFLGCFCGGNGALVDADGCSKVSGSAATRSGKKINKINIAAIAGGAAAGVGALLIAGVIAVFFIRKRKQRKVTSSSKLLKYSGSGGTPTRSRGSDMESGSVQDMGNRFSYEELEEATDSFNEKREIGDGGFGTVY…	leaf rust 10 disease-resistace locus receptor-like protein kinase	Brachypodium distachyon	disease/defence	Y	PM	15573.7	7503.26	11010.7	6208.79	10074.1	20271.5	14957.1	7756.67	9304.64	13072.5	24251.3	30457.2	29974.6	35892.1	30143.8	28674.9	27004.1	24499.2	14588.2	23691.6	20316.8	20336.7	24593	16194.1	20360.2
Bradi2g47020.1	0.0346802	0.0469244	0.950164	0.791455	0.0485287	0.308418	1.84194	0.832877	0.832877	1.27053	1.84194	1.51627	MAPLLLLPVLLLFATAADGYPSACRNATCGEQTIAYPFWLNSSSSASPSSCGYPGLGLACENNTTLIFLAQSHRYRVSSIDYDTHTISLADADAFTTTTGCPLLDFNLTIDTISALQLSHADSNITFFYDCKKNASWTSAVELSSCPAAYNKSSYVFQGDGYAGEAYEFECQAAVVAPVLEVHKKGLADFPLATRYVDVLKAGFELNYSPNSDQCGRCERSSGWCGYRDNQTHGGIGFSCFCDGGPTTDHCGTCDYRATKTVKSVYLCSRLSMGYPTCLLVPLFLFVHASASLLPLTTYNESTCSESFNCGSVDIKYPFYLSNATGRNQEDYTTYSCGYTDLKIFCHGDGDTKTPILRLGEANYTIQNIFYDNRSMTLVDTDALSGKCPLVRHNVTMDP…	uncharacterized protein	Brachypodium distachyon	unclassified	Y	PM	10852.3	5177.14	3399.98	5723.8	6288.29	8949.16	3394.26	4792.8	3813.26	5237.37	10902.2	5881.21	6410.32	8764.17	7989.47	16636.3	11633	10503.1	7558.24	11582.7	10711.3	8791.44	9933.24	8703.08	9534.77
Bradi2g47130.1	2.83771e-07	2.90005e-06	0.244253	0.41045	3.34927e-05	1.96961e-05	2.4056	0.649525	0.649525	1.28338	2.25879	2.4056	MEAAMDSGSVRATMSIFGESISGRKAEKNRGHVLAQENLSSEMKQLAKSGMDKLKERKASVDKERAGAESELSRARAMAKELERQIDQTKSRATSQKSELQGIRATRTGKKDAEESLSPDAQYVAVTQELDRAKRELRKLKLELKSAAEAKAKAESDVVSTVCKIQSSLQAADEMRRQVDEANEEHVLVELARIEAERERRELAAQRDAEAARFAREIEATRAKVESARDGLSRARALEAKLEATNADVEVLQGEMELVRAMEKNPVSPKNNDETAEERALLQASEAELSAAKRELDNIRAGGFQFMTSMDRTRTEIARVVEEANRLKAQEKDADAQVQQLNAKLLKARAQMESVTAASERSKAIMSNLTAAMQQLHAETEAANKEEELTLLEKRCVVA…	protein PLASTID MOVEMENT IMPAIRED 2-like	Brachypodium distachyon	cell structure	N	cytoplasm	1813.44	1360.26	1775.92	1437.5	1596.78	413.106	1272.93	847.298	1615.26	1037.15	1834.92	1910.92	2002.76	2448.5	2049.27	3656.13	3399.44	3166.32	4205.25	3606.78	3063.38	3796.58	4413.1	4091.77	3841.21
Bradi2g47970.1	2.20211e-05	8.13876e-05	0.00160152	0.00455148	1.17738e-06	0.000382249	1.84384	1.41809	1.47745	1.41809	1.84384	1.55668	MDVSQGVLLSSALVGAGANGTTPAWPELLGSAHWDGLLDPLNLTLRRLILLCGDLCQVTYDSFNSDSHSKYCGTCRFSRATLFSRTQFPAAADVSVAANLYATAQTSLPAGLMVYSLSREAWSKESNWIGYVAVSTDAAAAATGQRVIYVALRGTIRNLEWVDVLKPDLVAPDAILPESDPARGHARVMKGWYVIYTSSDERSPFSKYSARDQLLAAVRELVAKYKGKVGESLSIVCTGHSLGASLATLCAFDMVVNGVSKVGDAHVPVAAIVFGSPQVGNPEFKKRFDELPNLRALHVRNKPDLIPLYPSNLLGYANVGDVLSVDSKKSPHLKPDTTNVGDYHNLQGILHTVAGWNGKDGEFKLQVNRSVALVNKSSAFLKDENLVPESWWVEKNKGM…	phospholipase A1-II 5-like	Brachypodium distachyon	metabolism	Y	PM,chloroplast	558794	572921	770060	932568	708586	1.05465e+06	1.11929e+06	1.06624e+06	947431	1.0469e+06	970251	1.01189e+06	935803	1.10141e+06	1.00484e+06	1.17252e+06	1.44583e+06	1.33238e+06	1.27535e+06	1.30652e+06	1.11884e+06	1.14213e+06	1.07713e+06	1.07407e+06	1.10304e+06
Bradi2g48810.1	1.23548e-08	2.68816e-07	0.999383	0.993594	9.89022e-05	1.26772e-10	13.5648	0.648844	0.80851	0.648844	8.40301	13.5648	MACTVLPLHAPISSPLRPLPSRSSYLLAPGGVPLVRRGPRVSHHLHLTPPRALPDIAAASAGLRDVLADAVLAYPPTWSSAAATNLAVFVAGSPLLLSGLSASGFAAAYLLGTLTWRAFGAQGYLLVAAYFVLGTAVTKLKIKQKEALGVAEKRGGRRGPGSVIGSSAAGCVCALLSIYNIGGGALAELWILGFVASFCTKLSDTVSSEIGKAYGRTTYLVTTFKVVPRGTEGAVSVEGTLAGIVASMFLAGVGYILGQVNVPQGLVCVLASQIANFGESLIGASLQDKEGFEWLNNDVVNVLNISAGAILAVLMQRLLVSWRS	uncharacterized membrane protein sll0875-like	Brachypodium distachyon	unclassified	Y	PM	1114.43	749.314	631.028	701.046	798.955	870.184	565.145	682.751	465.772	645.963	389.318	271.612	541.604	871.053	518.397	7017.22	3963.14	6275.4	9598.73	6713.62	8774.17	10158.6	12057	12360.9	10837.6
Bradi2g50340.1	5.4983e-10	3.37146e-08	0.996207	0.999969	0.0033859	2.12741e-12	26.1632	1.13321	1.45237	1.13321	7.93929	26.1632	MPVARPEPQEPRVIAHLDLDCFYVQVEQRRNPALRGQPTAVVQYNDWKGGGLIAVSYEARKFGVKRSMRGDEAKHVCPGINLVQVPVAREKADLNIYRSAGSEVVAILSTKGKCERASIDEVYLDLTDAAKERLLESPPESSEIIFEEATKSNILDLSSDVSNREENVRAWLCRADADYQDKLLACGAIIVAQLRIKVLEETQFTCSAGIAHNKMLAKLVSGMHKPAQQTVVPSSSVQDFLASLPVKKMKQLGGKLGSSLQDDLGVKTVGDLLTFTEEKLQDYYGVNTGTWLWKTARGISGEEVEDRILPKSHGCGKTFPGSKALKNNASVKSWLDKLCEELSERIQSDLNSNKRVAQTLTLHARACKENECNLMKKFPSKSCPLRYGTGKIQEDAMKL…	DNA polymerase eta-like	Brachypodium distachyon	cell growth/division	N	nucleus	158.073	388.52	1167.06	1501.28	803.733	1550.73	1049.28	796.662	1272.6	1167.32	659.26	1207.32	490.388	1286.22	910.798	5071.03	3896.89	6412.82	10143.6	6381.08	16585.2	20733.6	23943.9	22850.3	21028.3
Bradi2g51620.1	1.10192e-07	1.44319e-06	0.984894	0.979267	4.90956e-05	2.18033e-07	9.85051	0.570542	0.606775	0.570542	7.49613	9.85051	MPAAAASGGGVADAEDLFRTKRIAEIRAAESATRREISAKEEELRQLVGRSYRDLLDSADSILLIKQSSDSISDNLSRVSESLSSLSPPPEAPSASANAASPSPSGGRARLYAAAARAKYLVDTPEHIWGRLDEGMLLEAAGRYMRAQVVHRLLSRDAAAAARFPLLAHQAQLVEAFRPQIAQRARERLADRRLSSALASDPSSYTSVLCDVARIVRVTLGHVGQLFVPALTDLPLFYKTVLESPPPAQLFGGIPDPDEETRLWREHWDRLEATMVLLETEAVARTCTDWLKECCDEIFGVIAGAQRLVDAIESGEGLGSVQKLMREALDERKGLEGSLEQWLKSVFGSEIESPWDQIRGLILKEGKDIFEDWVEEAFVRRMKDIVHSEFDSLGGSVNV…	conserved oligomeric Golgi complex subunit 1-like	Brachypodium distachyon	unclassified	N	cytosol	5231.4	3764.67	3872.94	2044.42	3728.36	1795.37	2470.19	2712.63	2070.9	2262.27	2324.9	1153.84	2605.05	2424.94	2127.18	18954	37921.6	20292.5	34624.9	27948.2	39417.6	43782.2	27582.4	36122.6	36726.2
Bradi2g53310.1	1.48173e-10	1.1758e-08	0.860589	0.318649	0	7.43454e-08	8.13174	1.33323	1.33323	1.72877	8.13174	4.98276	MSMWRFSRSVLRAATAAASAPASPCGRSAARRLYPPPALQRFRYASQPAAEAALGKDPEAEVTAEEARRLMRLANVEALKRRLGDGEVIQYAELLRACEDTGAARTRAEATALAGALDEAGVVLLFRDKVYLQPDKIVDLVRKAMPLALTPEDDPRKEELKQLQTKLEDINKLAHKQVRRILWSGLGFLITQVGLFFRLTFWEFSWDVMEPITFFTTTTGLVVGYAYFLITSRDPTYRDFMERLFQSRQRKLIQRQNFNLERYLELQRCCKDPLEKMWGTSHFSSTDIAHLHELSVQK	calcium uniporter 6, mitochondrial isoform X2	Brachypodium distachyon	transporter	N	mitochondria	6774.57	3057.26	4313.34	6601.29	5186.62	8738.03	6568.49	7412.85	4940.5	6914.97	8737.85	9949.22	8657.32	8521.51	8966.48	44326.8	38704.4	38644	47029.7	42176.2	20243.4	23982.9	32855.9	26292.3	25843.6
Bradi2g54110.1	0.000297047	0.000731235	0.225557	0.0038159	0.000157553	0.00195416	8.27932	3.34783	3.34783	5.99974	8.27932	6.452	MPPTAATLPPPTSHSRVPAAKSIWLNPNLPSSHPLHRHKSAELQRQQKQQQDHAPDIPALVEALSAARGAPDLASALSSHRPVSPRLLCTLLSRLPDPRRGVALLDLLGPDLPASALLVPYNLLLRAASRAGQLRLASGLLLEMRHRGVAADAFSYSTLLAALTRAGHLDHALTFLPLMEADAVSPDLVLFSNLIHLALRGGDAPRALALFSRLRAAGIRPDLKAYNAAIAAYCKSDLLRDAKRLLLHDIPADGVAPDAESYSPILAALARRGRHLAAVSLFSHMRAVARVKPDLSVFNIVLNAYGQLDLAREADRLFWSMRRTGVPPSVVTYNTMLRVYGDAGLFGEAVHLFGLMCSSASDGNGSSVKPNVVTYNTIISIHGKSLEDEKAGSLVRDMQ…	pentatricopeptide repeat-containing protein At5g39980, chloroplastic-like	Brachypodium distachyon	unclassified	N	chloroplast	2739.45	3031.66	4489.46	7488.5	4437.27	11237	20457.3	12043	15683.5	14855.2	21187.6	37688.1	19030.3	28583.8	26622.4	51180.7	45400.4	24053.1	26316.1	36737.6	21081.4	29796.3	29984.9	33654.6	28629.3
Bradi2g54890.1	1.27641e-10	1.07617e-08	0.999911	0.995166	3.60711e-09	3.75255e-14	16.4399	0.699228	0.891857	0.699228	11.9243	16.4399	MATRFVLNTGAKMPAVGLGTWQSDPGVVGEAVYAAVKAGYRHIDCARAYNNEKEVGLALKKLFEEGTVKREDLFITSKLWCGHHAPEDVPEAIGDSLNDLQLEYLDLYLIHWPFRVKKGTSINNPENYIPPDIPATWGAMEKLHDAGKARAIGVSNFSSKKLGDLLSVARVPPAVNQVECHPGWQQSKLHAFCQSTGVHLSAYSPLGSPGSTWMNGNVLKEPVVLSVAEKLGKTPAQVALRWNIQMGHSVLPKSVSEERIKQNLDVNDWSIPDDLLAKFSEIKQVRLLRGNFIANPDSVYKTVEELWDGEI	aldo keto reductase domain containing protein	Brachypodium distachyon	unclassified	N	chloroplast	35556.1	39866.3	36884.1	33554.6	36465.3	28598.6	39473.8	30378.5	31636.3	32521.8	24805	28390.3	21040.7	27754.1	25497.5	467805	381039	409415	481035	434824	497367	532133	748890	619545	599484
Bradi2g55120.1	4.15083e-06	2.23087e-05	0.111282	0.0469805	0.000195055	0.657822	1.7521	0.621461	0.684999	0.621461	1.7521	1.14942	MSAADKVKPAATPGSADPAAIAGNISYHAQYSPHFSPFAFGPEQAFFSTAESVRDHLLQRWNDTYVHFHKTDPKQTYYLSMEYLQGRALSNAVGSLGITGAYAEALKKFGYELEAIAGQERDAALGNGGLGRLASCFLDSMATLNLPAWGYGLRYRYGLFKQIIAKEGQEEFAEDWLDKFSPWEIVRHDVVYPIRFFGHVEISPDGTRKWAGGEVMSALAYDVPIPGYKTKNAISLRLWDAKATAQDFNLFQFNDGQYESAAQLHSRAQQICAVLYPGDATEEGKLLRLKQQYFLCSASLQDIIFRFKERKPDRVSGKWSEFPSKVAVQMNDTHPTLAIPELMRLLMDEEGLGWDEAWDVTNKTVAYTNHTVLPEALEKWSQTVMRKLLPRHMEIIEEI…	Alpha-1,4 glucan phosphorylase	Brachypodium distachyon	energy	N	chloroplast, cytosol	127963	106019	109659	88374.9	108004	80515.2	73378.9	67593.2	74443.7	73982.7	75735.2	60602.6	56596.2	75547.8	67120.4	238732	191507	187386	139314	189235	118415	114653	142527	120972	124142
Bradi2g55150.1	4.43999e-05	0.000147615	0.00526108	0.00692606	1.17797e-05	4.05728e-05	2.54272	1.83017	1.86109	1.83017	2.54272	2.382	METVAASGYARGAATRSPACCAAMSFSQSYRPKAARPPTTFYGESVRANTARTLPGRQSKAASRAALTTRCAIGDSLEEFLTKATPDKNLIRLLICMGEAMRTIAFKVRTASCGGTACVNSFGDEQLAVDMLADKLLFEALEYSHVCKYACSEEVPELQDMGGPVDGGFSVAFDPLDGSSIVDTNFTVGTIFGVWPGDKLTGVTGGDQVAAAMGIYGPRTTFVVALKDCPGTHEFLLLDEGKWQHVKDTTTIGEGKMFSPGNLRATFDNPDYDKLVNYYVKEKYTLRYTGGMVPDVNQIIVKEKGIFTNVTSPTAKAKLRLLFEVAPLGFLIEKAGGHSSDGKQSVLDKVITVLDERTQVAYGSKNEIIRFEETLYGSSRLAAGATVGATV	sedoheptulose-1,7-bisphosphatase, chloroplastic-like	Brachypodium distachyon	energy	N	chloroplast	164688	126250	180612	277990	187385	341972	448983	338229	265778	348741	374210	325210	290940	381429	342947	530452	524552	447136	403736	476469	441818	477735	479461	386397	446353
Bradi2g55430.1	8.389e-09	1.9854e-07	0.392453	0.999461	6.10473e-09	0.864098	2.07023	1.01406	1.13179	1.01406	2.07023	1.06547	MGAPGRDEEEAKKMEAGDDTVGQKLDAGALFVLQSKGSWLHCGYHLTTSIVAPPLLSLPFAFASLGWAAGMVCLVIGAAVTFYSYNLISRVLEHHAQQGRRQLRFRDMATDILGPGWGRYYIGPIQFLVCFGAVVASTLLAGQSMKAIYLIAVPGGTIKLYVFVAIFGGWMMILAQLPSFHSLRHVNLVSLMLCLSYSFCAVAGCIYLGTSDRAPPKDYSISGNTHSRVYGVFNAIAVVATTYGNGIIPEIQATVAAPVTGKMFKGLCLCYAVVITTFFSVATSGYWAFGNAAQGTLLSNFMVDGKAIIPEWLLLMTELFTLLQLSAVAVVYLQPTNEVLEGVFSDPKAGQYAPRNVVPRLLARTAAVAIGTTVAAMVPFFGDMNALIGAFGFLPLDFA…	lysine histidine transporter-like 1-like	Brachypodium distachyon	transporter	Y	PM	30352.5	27250.2	25234.2	24646.2	26870.8	32125.7	32330	25956.9	31235.6	30412.1	27055.3	25967.5	27894.3	28076.9	27248.5	57110.8	49520.8	62371.3	53512	55628.7	28704.4	27370.7	25859.1	32585.8	28630
Bradi2g55690.1	4.6517e-06	2.41352e-05	0.778822	0.0113617	7.62529e-06	0.000152093	17.3434	2.85443	2.85443	8.16743	17.3434	12.3562	MEPRARASSLLLCLMLSLFSVDIVSAQQRFGINYGQIADNLPDPTQVVRLLRSMNVNKVKLYDADSKVLTSFANTGVEFIISVGNENLQTMATTPGAARQWVSQHVQPFIPATRISCVIVGNEVLGNNDNGMAASLVPAMQAIYDALVDLGLSRQVTVSSAHSVNVLASSFPPSSGVFQEGLAQYIKPLLEFHSKTGSPFLINAYPFFAYKGSPGSVSLPYVLFEPNAGVVDPKTNLSYDNMLYAQIDAVYAAMKAMGHTDIGVRVSETGWPSKGDEDEVGATVQNAAAYNGNLMQRIAMNQGTPLKPEVPIDVFVFALFNENMKPGPASERNYGLFYPNGSPVYAINAGTGAGSGPGAGSGSVGRFDPYSSQMFSAASKLAVTFRAAVGVLLAALFL	glucan endo-1,3-beta-glucosidase 14-like	Brachypodium distachyon	cell structure, disease/defense	Y	PM, cell wall, apoplast	12107.4	19291	15963.5	13131.6	15123.4	55422.7	58927.2	27837.9	30486.8	43168.7	123720	151704	121054	97598.6	123519	280911	371589	177171	219497	262292	142577	167414	240984	196495	186867
Bradi2g55920.1	0.000112103	0.000316374	0.0198322	0.000316436	3.59506e-05	0.10083	2.56723	1.58287	1.79458	2.33022	2.56723	1.58287	MAAYEKQQPPPPPQQQQPYYAYPAPPPQPAYYAAPPRPRRSGGGPRCFVCFLFKVIAIAVIALGALTIALWLIFRPGSVRATAVSATLSRFDLPDGPAPGARELLQYNLTVDIRVRNPNRFGIRYEYLEARASYDGERFGYDPLEPFYLDGKAERTVTAAFGGSEPLDGNGALRAYRREKSDGFYYVKVRLYTDVAFRVRVFNVRRKSKISCTLRLPVPSASSAPVPTMLGTRCDVDF	NDR1/HIN1-like protein 10	Brachypodium distachyon	disease/defence	Y	PM	68316.6	58264.1	68679.2	74292.1	67388	103101	146173	110935	123523	120933	155031	186127	132407	154550	157029	228675	165317	139189	158820	173000	92961.4	93660.8	135999	104044	106666
Bradi2g56767.1	4.92364e-06	2.52547e-05	0.41251	0.000478953	2.27324e-06	0.00211146	3.30143	1.40726	1.40726	2.3963	3.30143	2.19366	MDVEKRVEATEVDDDGRTRTGTVWTATTHAITAVIGSGVLALPWSVAQMGWVLGPIALVGCAYITYYCAVLLSDCYRSPDPVHGKRNYTYMDAVRSCLGRRDVIICGIAQYAILCGAMVGYTITTATGIMSVVKSNCRHYNGHDAKCSTTGTMYLVLFGLVEVVLSQLPSLEKVTFISVVAAVMSFTYSFVALFLSAAKFASNHKAYGTILGSKIGGPGGVSATTRTFNFLQALGNIAFAYTYAMLLIEIQDTVKSPPSENVTMKKASFYGIGVTTIFYVSLGCIGYAAFGNAAPGNVLTGFDEPFWLVDLANVAVVIHLVGAYQVYAQPVFACYEKWLGAKYPESAFFHREYKLPLGLRFTASKLLLRTLFVTFTTVVSLMLPFFNAVLGLLGAAAFF…	amino acid permease 5-like	Brachypodium distachyon	transporter	Y	PM	13509.1	11984.3	11151.1	19225.1	13967.4	23352	19808.8	16641	18821.2	19655.8	35767.3	36334.8	26992.1	34785.9	33470	58094.6	44750.1	47331.1	34273.8	46112.4	30472.8	26076.8	34558.5	31450.6	30639.7
Bradi2g57335.1	6.95977e-12	3.12958e-09	0.99671	0.967827	2.72638e-05	0	173.321	3.20135	3.20135	5.09476	57.2181	173.321	MAPKMGKEDTDLLVMVDKLMRGKRELLVVVETGVVYVVRGLYVIEILWSEGYKPWPPLHPLLIKGRNLYKDKTMRQPWPDEQKRSRVLQEKHARGFIARKSRDVRIHDKEIEKMRRFNRIKENRSKGKEDINQKSSQKPVSTNTVCQRSDEGRIPSLQHGEPGNTMQHHISSKQNPANHLVNQQFPCWQHYNEVLPQEGAMRTSRPESIEHQVPSVQQGEPEKTRQQQILSRPAPAQQIFKHPQQQNNHRPDPAQQMFKPPQEHGNGQQHNLQQGTTKSFSILGQAPGIHLGGPGNARQLQKSPKPTPVRQIMNQAQPPNYQHRNEVILEEAAKKTCRVDSVDHRNGTYHNTDSVKAPCVQHGVSGNAWQQQKSSKPTPIDQIKNLPQSPVHQYQRGVL…	zinc finger CCCH domain-containing protein 62-like	Brachypodium distachyon	unclassified	N	nucleus	0	74.3047	83.5311	237.915	98.9376	452.175	270.048	269.517	275.195	316.734	338.457	724.017	301.371	652.407	504.063	5750.9	3547	6655.85	6690.35	5661.02	15792.7	15360	20271.6	17167.5	17147.9
Bradi2g58020.1	1.09029e-11	3.67702e-09	1	1	6.66134e-16	9.99201e-16	9485.55	0	0	0	8964.62	9485.55	MAADATVFPYGLRVLVVDDDPTWLKILEKMLRKCSYEVTTCGLARVALEILRERKSKFDIVISDVNMPDMDGFKLLEHIGLEMDLPVIMMSIDGETSRVMKGVQHGACDYLLKPVRMKELRNIWQHVYRKRMHEVKEIEGHDSCDDLQILRYGFEGFDEKGIFITADSDTTRKRKDLDKDHADQDSSDGATAKKARVVWSVDLHQKFVNAVNQIGFDKVGPKKILDLMNVPGITRENVASHLQKYRLYLGRLQKQNEERILGAARQDFSNKGTSENLNLRSSFQDQPSNVSSGYPHASQKIQGQSSMLDSQLEDTKCTVPLPASDKSRNSVNDVADSQNVADASPLSGVLSFKGLPVNQDNNPSETMIMECQTWNGGVPSKQFMQYPKHNHARCDLLGD…	Two-component response regulator	Brachypodium distachyon	signal transduction	N	nucleus	0	0	0	0	0	0	0	0	0	0	0	0	0	0	0	8339.6	7937.21	9427.5	10154.2	8964.62	8227.8	8138.89	11521.5	10054.1	9485.55
Bradi2g58330.1	3.00154e-09	9.41644e-08	1	1	7.97763e-06	1.50678e-11	31343.2	0	0	0	19353.5	31343.2	MASRNTEQSAGSISASPNATSSQCPPAMHPELLMAACQGYYGQLDLLLNREDTEVNLLIILLFFGRTILLGAFGRMITLTILQVIVNVDGSTEYAASLLLQGATPDGDSALHIVASSGDGDRYVKSAEVIYSRAKHLLAARNGRGSTPLHCAARAGNFAVLSLFIDLARREEEAGAVDSRIRTRTLLRMQNKPAGETALHEAIRAAHMPMVGELMTADDCLARVPSHDGTSPLFLAVSLRHHAIARELYKRDSQLSYSGPHGQNALHAAVLRSQGMLSAIIFLVTRCSGCAGLRDNHGRTFLHIAVKKRRYHVVAYACRTPLLGSILNLQDNEGNTALHLAVEAGDWWTFAYLYANKHVDLNLPNISRHTPRELSVRTIPTGVYCMLNSRILIQQALIS…	putative ankyrin repeat protein	Brachypodium distachyon	signal transduction	Y	PM	0	0	0	0	0	0	0	0	0	0	0	0	0	0	0	18247.2	14663.8	20710.6	23792.5	19353.5	21338.2	32439.2	38202.8	33392.4	31343.2
Bradi3g01667.1	2.27207e-07	2.40353e-06	0.999998	0.999696	3.22598e-06	0.0001233	215.958	0.000332743	0.000332743	4.40422	215.958	143.158	MAVHLRPGGGDAEQEPGASRGARRRRARLETASKAQRETGEAMLKLQRRVEELQAAAREKDAEVGRLRAEAAGARTKLQEAHQESESCANLSQNTAEHDIASNLGTELRKLKQAYEILSSKKDKEVSALLSERDFVCDQMSIMEQDFAALLKKLEAAQATESAQKLQQNINELQVLAEKKDDEISRLRAKAVSAKEKIDYLQLLVKEKDDEIERLKGGLPETIPKRNKDISETHKRSRNEGPAVWTESKNSCPRTMIEEDFASEIEMAEKHGQAETSKKPKYASSLSNSGNGGDGDEQSGHDEDGDEQSGGDKDDELIGTDEDGDEQSGTDEDSDEQSGTDEDGNEQSGSDDGSEDVDEQNRLPLTRISGEAPNLFCRSVSLMVHVCAPFSKKKLMSTS…	SWR1-complex protein 3 isoform X2	Brachypodium distachyon	DNA modification	N	nucleus	254.275	0	0	0	63.5688	0	0	0	0.0846082	0.0211521	0	0	513.696	606.187	279.971	10738.4	11503.8	14350.7	18319.8	13728.2	4197.2	9064.82	11784.7	11354.7	9100.35
Bradi3g02410.1	1.03152e-09	4.21675e-08	0.99477	1	1.48745e-05	1.32117e-13	8.97134	0.827673	0.827673	1.01018	5.23285	8.97134	MGYVLSAVARVLQQPTAWGAACEMALLAGPLWAAALVGLLLGWAWRPRWAAGIVATADPPQFATAEFWRGQLPARLRAPLDYFAGGTAATAAAQQEEEETSLQGSSEMANEELAVGKDDLVKLWRLVEGNDGGPSWIKMMEKALPDMTYQAWRRDPQNGPPQYQSSTIFENATPEEVRDFFGDDEFRMSNKWDDMLISHKTLEECQTTGMMKVHWVRKFPFFCSDREYIIARRIWKLGSAYYCVTKGVQCSSIPRRSKPRRVDLYYSSWCIRAVESRRGNGGSTACEILLFHHEDMGIPYEIAKIGIRQGMWGCVKRIEPGLRAYQEARAAGEPPSPSALMARINTKVGDNFVRALESNSNQSDIVEAEEKPVKNRVARFLVLGGAVALACTLDQGLLT…	START domain-containing protein	Brachypodium distachyon	lipid transport	Y	PM, mitochondria	1353.23	1036.31	1284.43	800.34	1118.58	970.351	940.623	890.042	902.25	925.816	1406.13	1052	977.188	1084.52	1129.96	6427.74	4566.39	5724.34	6694.92	5853.35	7877.78	9956.08	12386.7	9919.99	10035.1
Bradi3g04490.1	7.83936e-10	3.77689e-08	0.999999	0.999963	0.00804208	3.04201e-14	173.642	0.0117575	0.561784	0.0117575	45.0345	173.642	MAQMRVFGDEHGQQELLRGEFHGSSSDKGDNSSNKKARAGLCGLLRERKVLELARGKRRLVEVPYTATLAHAANALLAGRVSAVTVAAPPGHWIGAGGSMIVESDPATGAARKHYIGMVNMLDIVIHIAEAGQDNEDDDLDRRMAVPVSSVIGHSLEGLTLWTLHPNTSVLDCMETFSKGVHRALVPLESSAPDTIVAVELVESAPAYKMVTQMDVVRFLRDHGAELGAVLSRTVGGLGAASEAVLAVASRTTVIEAVRTMRAASLTAVPVVDAPVDAYVLQDGRGKKVVETFSATDLRDCPVARLRAWLGAGVTEFKEKVAEYRREGGRRPLDSAAAGDGGAQATDDGYDTDDEDDTAAGRGGGEEEKRMVTCTMESTLGEVVEKAVENHVHRLWVVD…	SNF1-related protein kinase regulatory subunit gamma-like PV42a-like	Brachypodium distachyon	signal transduction	N	cell wall	293.975	0	3.29696	202.103	124.844	0	277.652	2.88914	0	70.1353	0	0.00014703	2.8155	3.05575	1.46785	6860.01	3345.53	6844.43	5439.11	5622.27	18061.2	17658.7	26231.6	24760.8	21678.1
Bradi3g04500.1	5.489e-09	1.51115e-07	0.928025	0.998933	9.6552e-09	1.14777e-08	105.405	2.9179	7.08061	2.9179	99.1249	105.405	MFDSLLNTKFFNKCKHAIKCTRTRLDLVRKKKQAMVKFLKKDVVDLLTNGLESHAFGRMEGLIVEMNQASCYDMIEQYCECIVKQLNNLQKQSECPHEALEAVSTLIFAAARFPDLPELCELRHIFTEKYGTSIEPFVSSEFVQKLQDKSFSHDEKLQMVQNIAEEFELPFNTKAFERKISGVPQNKHELLKKGSFNGIGVEASGRGHKVDRPAGLQRKSKSIPEGLDWKQEVLVKPKDIHVIPDCIGQVGEKSRNNYSDKPNEKKHMNNGVPSLDIKRRNGQKEVKKDDKKGGQSWRELMNAEELDLNGSKKQETSVAKSLQREIKKVVPPYTELKETAKKDNIEKVDGNGYHAHRSHMAGDTNDYWGHADLGLKTLGLEKPGTDSANTLNGKTVNKL…	uncharacterized protein LOC100836034	Brachypodium distachyon	unclassified	N	nucleus	207.171	97.3604	0	564.4	217.233	3442.61	2033.06	65.3635	611.523	1538.14	455.064	1405.34	67.6186	607.426	633.863	20598	18445.5	18499.8	28589.4	21533.2	16616.4	22780.3	27429.5	24763.3	22897.4
Bradi3g05767.1	9.23705e-09	2.04335e-07	1	1	2.80333e-07	1.47742e-07	68.9627	0.932392	1.12943	0.932392	64.4692	68.9627	MSGGGVFLGVDVGTGSARAGLFDDKGKLLGSASNPIQIWKEKDCVERMVLAVAVGADGSPVSVSWNGDSRRDIIVWMDHRAADQAGRINSQNSVALQFYGGGVYPEMQVPKLLWVKENLQESWSMVSRWMDLGNWLTYRATGDDTRSLSHMEQWRESVSRDMDGADEDFWVEIGLEDLYNGSNKKIGHDVAFPGHPLGSGLTPASAKELGLLPGTPVGISLIDAYAGGIGVMESVPDEDFKSDMSDEEAICHRMVLVCGTSTCHMAVSKNKLFIPGVWGPFWSVMIPEFWLTECGQSATGALLDYVVQNHVAAPLLANQAASQSVSIYELMNKILLSMSHEQNMPFLSALSQDTHVLPDFHGNRSPVADPKSKGVICGLTLDTSEKQLALIYLATIQGI…	FGGY carbohydrate kinase domain-containing protein-like	Brachypodium distachyon	metabolism	N	chloroplast	3350.52	5612.48	910.524	3503.34	3344.22	3905.45	2515.81	4115.91	4571.05	3777.05	4126.37	3080.19	3104.91	2161.01	3118.12	221052	150962	228519	261863	215599	187878	190073	307490	237063	230626
Bradi3g06750.1	5.08173e-05	0.000164001	0.418331	0.423686	2.51135e-05	0.00293003	5.23869	1.91714	1.92287	1.91714	5.23869	3.61528	MATAASLSALSSAAAAGKRFVLSSPSLSFASRRLAAPAHLRAAFGPGARRVAAAAATASPVVATIAVGDKLPDATLSYFDPADGELKTVTVGELTAGKKAVLFAVPGAFTPTCSQKHLPGFVAAAGDLRAKGVDTVACVSVNDAFVMKAWKESLGLGDDAGVMMLSDGNLELTRALGVEMDLSDKPMGLGVRSRRYALLADDGVVKVLNLEEGGAFTTSSAEEMLKVL	peroxiredoxin-2E-2, chloroplastic-like	Brachypodium distachyon	disease/defence	N	chloroplast	2593.85	2281.65	49.6935	5097.5	2505.67	5119.39	6429.94	5597.66	2125.37	4818.09	3971.99	4708.38	4126.01	6408.51	4803.72	13252.6	13686.6	8065.44	17501.1	13126.4	9264.55	9443.88	7785.54	9740.85	9058.7
Bradi3g07926.1	1.51832e-05	6.02415e-05	0.386868	0.281849	0.000446824	0.0881813	2.9708	0.352565	0.432951	0.352565	2.9708	1.90184	MMWQPLRLDIKRKLAQRSERVKSVDLHPTEPWILSSLYSGSVCIWNYQTQTMVKSFEVTDLPVRSAKFIARKQWVVAGADDMHIRVYNYNTMDKVKVFEAHTDYIRCVAVHPTQPFVLSSSDDMLIKLWDWDKGWACTHVFEGHSHYVMQVTFNPKDTNTFASASLDRTIKIWSIGSPDPNFTLDGHSKGVNCLDYFTGGDRPFLITGSDDQTAKVWDYQTKSCVQTLEGHAHNVSAVCFHPELPIIITGSEDGTVRLWHSTTYRLENTLNYGLERVWALGYMKGSRRIVIGYDEGTIMIKIGREVPVASMDNSGKIIWAKHNEIQTVNIKTVGAGNEIADGERLPLAVKELGSCDLYPQSLRHNPNGRFVVVCGDGEYIIYTALAWRNRSFGSALEFV…	Coatomer subunit beta'	Brachypodium distachyon	intracellular traffic	Y	PM, Golgi apparatus, cytosol	3826.45	7942.17	7178.76	3316.42	5565.95	2872.47	2579.87	1046.47	3140.32	2409.78	1694.88	1253.96	2334.59	2566	1962.36	12282.1	21433.9	14193.8	18231.5	16535.3	5421.15	12059.8	15780.6	9080.62	10585.5
Bradi3g09660.1	8.92539e-10	3.88398e-08	0.999988	0.999991	2.72543e-11	1.19792e-06	176.535	0.223367	1.83197	0.223367	176.535	121.65	MAAIVSSAAPTALTPPRARGRRPRPAARTNRRLLRAGLAAGLSAALGLANGGGGAALAEPLSYDEMLRLSTDTAGGDGFALPDLGLDGLVDFVAQNPLVVAAGFAVVAVPLVLAQVLGGGSSKPYGTVSGKAAYQRLLEEPDAQLVDIRPLKDAREVGSPDIREAKKKAVAVPYDGEDKNGFLKKLQLRLKDPENTTLIILDKFDGNSELVAELVTANGYKAAFAVKDGAEGPRGWQSSNLPWTAPRKGFSFDLGDLFGDGSEGLPVTIAFAALTGLGIVAYTEIETVLQFLGSAAVIQLVTSKLLYAQDRKKTLQQIDDFFNKKIAPKELVDEIKEIGQALLPSSGDVKSQPAATEAAPAAAIATDAPVAEATPAEAITESPPETPSRPLSPFANYPD…	rhodanese-like domain-containing protein 4, chloroplastic isoform X2	Brachypodium distachyon	energy	N	chloroplast	313.942	0	0	580.45	223.598	0	919.882	290.5	428.116	409.625	0	0	0	199.778	49.9445	35940.6	29964.4	43162.7	48823.2	39472.7	21116.8	32804.6	28181.1	26700.1	27200.7
Bradi3g16307.1	0.0003207	0.000783739	0.892485	0.991013	0.00132023	0.0220732	2.45544	0.779559	0.779559	1.10654	2.45544	1.99908	MAPAVAGGSSRGAGCKCGFQVCVCSGSAAVASAGSSLEVERAMAVTPVEGQAAPVDGESWVGVELGPDGVETDESGAGVDDRPVFKTEKIKGVLLHPYRVLIFVRLIAFTLFVIWRISHKNPDTMWLWVTSICGEFWFGFSWLLDQLPKLNPINRIPDLAVLRQRFDRADGTSTLPGLDIFVTTADPIKEPILSTANSVLSILAADYPVDRNTCYISDDSGMLMTYEAMAESAKFATLWVPFCRKHGIEPRGPESYFELKSHPYMGRAHDEFVNDRRRVRKEYDDFKAKINSLETDIQQRNDLHNAAVPQNGDGIPRPTWMADGVQWQGTWVEPSANHRKGDHAGIVLVLIDHPSHDRLPGAPASADNALDFSGVDTRLPMLVYMSREKRPGHNHQKKA…	CsIF6	Brachypodium distachyon	cell structure	Y	PM, Golgi apparatus	290266	136178	171550	152011	187501	142705	171734	135960	134274	146168	240592	174171	189295	225852	207478	364659	321374	697467	458095	460399	409124	331148	381181	377868	374830
Bradi3g16967.1	5.98734e-07	5.14454e-06	1	0.99985	2.03367e-07	0.000219726	167.621	1.33597	1.33597	3.35684	167.621	108.425	MPRHLRLGVGARSLATAAIRRGDLAGAAEPEAVASTTPQRKTTADYNRLLAGYARAARPGGRRDRLLADARHLFDRIPRPDAVSYNTLLSCHFAAGDVRGARDLFAAMPATARNVTSWNTMLSGLSRSGAVGEARAVFLAMPARNSISWNAMVSCFAHAGDMCAAEECFEDAPDKENAVLWTAMVSGYMDSGHVEKAMQFFEAMPVRSLVSWNAVVAGYVKNSRAEDALWVFKTMVRDADVRPNESTLSSVLLGCSNLSALGFGRQVHQWCTKLPLSRRVTAGTSLVSMYCKCGDLDGACKLFSEMRIRDVIAWNAMISGYAHHGDGREAIELFEKMKSQGVEPNWITFVAVLTACIHTGMCDFGMQCFERMQEVYGIEARVDHYSCMVDLLCRAGSLE…	pentatricopeptide repeat-containing protein At4g16835, mitochondrial-like	Brachypodium distachyon	unclassified	N	mitochondria	0	294.834	0	0	73.7085	0	79.3935	82.1913	232.305	98.4725	141.742	220.317	329.556	298.097	247.428	15114.4	6780.61	12251.4	15274	12355.1	5180.51	7585.94	11293.8	7907	7991.81
Bradi3g18707.1	8.86186e-10	3.88398e-08	1	0.985887	8.7028e-10	1.13027e-10	50.0044	1.05151	1.05151	2.58342	50.0044	46.9909	MGDSYIILKTTALKNGSLRHDIHYWVGRDTSQDEAGTAAILTIELDAALGGRAVQYREVQGNETEKFLSYFRPCIMPQPGGVASGFKHVEVNEQEHTTRLYVCSGKRVVHVKEVPFARSSLHHDDIFILDTKSKIFQFNGSNSSIQERAKALEVVQYIKDTFHEGKCEVAAVEDGRMMADAEAGEFWGFFGGFAPLPRRASVDNNEKDEETSLKLLCFNQGKLDPINYECLAHELLETSKCYLLDCGAEMFVWMGRTTTLQERKGASEAAEKLLSDANRTKTHVIKVIEGFETITFKSKFKEWPQTPDLKLSSEDGRGKVAALLKRQGLNVKGLMKAAPAKEEPQPYIDCTGSLQVWRVNDKDKTILSSSDQSKFYSGDCYIFQYMYPGDDKDECLIGT…	villin-4-like	Brachypodium distachyon	cell structure	N	cytoskeleton	176.32	274.12	240.638	971.948	415.757	521.221	773.717	0	453.759	437.174	479.713	2860.65	736.672	219.255	1074.07	20575.6	18668.9	18318.6	25595.6	20789.7	14494.2	17801.1	22836	23015.9	19536.8
Bradi3g25093.1	5.58511e-06	2.74187e-05	0.984062	0.988866	0.000136379	0.000231761	3.10034	0.856367	0.856367	0.869747	3.10034	3.0232	MASLPPLLRPRRPRALLCAAPLSLSGAALAPRAAPPLRCLTPPRRPRSACDQPPPAASPRRAPPLPRALPSSAHVGRASSPAPVGRARLAPCSTLLRAREPALSPVLLPAARLQCTAPRELRLPAPPPPRRPSPPSLAPGRARPSSARDQPEPDAAHPYSLARSSSLLLGPSPSPSPAGPWPSSFSFLFSFSGKLFPLRVGAACQLLCATVWCYCAAAPRVLCRCPSPCERVKTEEPRSQSHERLRPRRLNDYFAYDGFIVYDYLVYVGYFLYIATPQRVQVYDSYDDDYACVLLPGFLLHSRQLSTPEVPAEQVSC	uncharacterized protein LOC100841342	Brachypodium distachyon	unclassified	Y	unknown	19194.3	12056.1	8598.87	10901.8	12687.8	12259.9	8812.76	11925.3	10463.7	10865.4	11524.1	10762.2	10455.6	11398.7	11035.2	31585.1	34475.1	33245.1	58040.4	39336.4	34930.8	34642.9	47181.4	36675.6	38357.7
Bradi3g26391.1	0.000132406	0.000362303	0.97691	0.293665	0.000144092	0.0018622	2.96227	1.15153	1.15153	1.59704	2.96227	2.51284	MAPTVMSSAATAVAPFQGLKSTAGLPIGRRSASAGLGSVSNGGRIRCMQVWPIEGIKKFETLSYLPPLTVESLLKQIEYLIRSKWVPCLEFSKVGFVFREHGNSPGYYDGRYWTMWKLPMFGCTDATQVLKELEEVKKEYPDAYVRIIGFDNTRQVQCISFIAFKPPGCEESGKA	ribulose bisphosphate carboxylase small chain PW9, chloroplastic-like	Brachypodium distachyon	energy	N	chloroplast	288781	302290	484611	816684	473091	357448	715417	500933	605315	544778	754556	891993	601558	774085	755548	1.10499e+06	1.77747e+06	1.21981e+06	1.50342e+06	1.40142e+06	812732	1.49025e+06	1.30811e+06	1.14413e+06	1.18881e+06
Bradi3g27300.1	3.04814e-07	3.04589e-06	0.965368	0.249162	4.18452e-08	4.6106e-05	6.04168	1.27067	1.27067	2.00845	6.04168	4.67783	MIQPQTLLNVADNSGARKLMCIRVIGTAGNQRYARIGDVIVAVIKDAVPQMPLERSEVIRAVIVRTCKEFKCEDGIIIRYDDNAAVIIDQKGNPKGTRVFGAITEELRELNFTKIVSLAPEVL	ribosomal protein L14	Brachypodium distachyon	protein synthesis	N	nucleus	4230.07	5537.64	3041.92	5181.03	4497.66	5200.59	7197.89	4011.4	6450.37	5715.06	8212.51	9947.93	10075.7	7897.26	9033.34	25644	21649.5	31096.7	30303.5	27173.4	12361.3	23944.8	26590.2	21260.9	21039.3
Bradi3g27325.1	0.00111039	0.00230448	0.015637	0.107368	0.000148097	0.045447	1.95398	1.39495	1.56681	1.39495	1.95398	1.47391	MSPQTETKASVGFKAGVKDYRLTYYTPEYETKDTDILAAFRVSPQPGVPPEEAGAAVAAESSTGTWTTVWTDGLTSLDRYKGRCYHIEPVPGEDSQWICYVAYPLDLFEEGSVTNMFTSIVGNVFGFKALRALRLEDLRIPPTYSKTFQGPPHGIQVERDKLNKYGRPLLGCTIKPKLGLSAKHYGRACYECLCGGLDFTKDDENVKSQPFMRWRDRFVFCAEAIYKSQAETGEIKGHYLNATAGTCEEMMKRAVFARELGVPIVMHDYLTGGFTANTTLAHYCRDNGLLLHIHRAMHAVIDRQKNHGMHFRVLAKALRMSGGDHIHAGTVVGKLEGEHRARGIFFTQDWVSMPGVIPVASGGIHVWHMPALTEIFGDDSVLQFGGGTLGHPWGNAPGA…	Ribulose bisphosphate carboxylase large chain	Brachypodium distachyon	energy	N	chloroplast	3.64091e+06	3.63682e+06	3.97915e+06	5.27755e+06	4.13361e+06	6.87695e+06	7.67891e+06	6.06124e+06	5.28918e+06	6.47657e+06	5.39466e+06	5.93803e+06	5.14102e+06	6.59091e+06	5.76616e+06	7.01402e+06	1.04916e+07	7.82309e+06	6.97912e+06	8.07697e+06	5.5619e+06	6.08349e+06	6.3322e+06	6.39275e+06	6.09259e+06
Bradi3g29750.1	0.0144207	0.02176	0.930474	0.999336	0.0288563	0.955693	1.87269	0.825231	0.825231	1.04937	1.87269	0.847644	MELSLVSAKPSPSPRAAASALLFAPLKPFPLLRFPPRRAAPFARLRSQRFQFRRAAGSGDGEGESDATARGEVFGGRREEVFGGRKELTGVQPLVESLPPAARTAAELAVAAAAVAAGYGIGLRLGGGSRAAAVAGAAVLGAASVAGAAAVNSVVPEVAAVGLHNYVVGCDDPTKLETSEVEAIASKYGVSTQDAAFKAELCDLYASFLYSVLPPGDEDLKGNEVEVITKFKSALGLDDVDAANMHMEIGRRLYRERLETRDRDADMEQRRAFQKLIYVSNLVFGDASAFLLPWKRLFGITDSQIDIAMRDNAKNLYTSQLKSIGRDLDIGTLIEVRRAQLAYKLSDEIAADMFREHAKKLIQENISSALDILKSRTKAANSPTQVIEEVKIVLAFNSL…	protein TIC110, chloroplastic	Brachypodium distachyon	protein transport	N	chloroplast	6959.44	6902.21	6568.71	7001.94	6858.08	4158.3	6697.42	4359.92	7422.34	5659.5	8271.44	7799.4	4121.78	8594.12	7196.69	14540.2	19709.3	9226.19	7896.66	12843.1	7441.17	4532.96	7298.7	3980.01	5813.21
Bradi3g29760.1	0.0186521	0.0270265	0.903204	0.916324	0.011131	0.999812	3.30514	1.08134	1.44093	1.42042	3.30514	1.08134	MEFSLVSAKPSPRAAAAAASAPRSSPTAARLRGRRFRCAAAAKGEQVFGGRKELTGVQPLVEALPPAARAVVELAVVAAAATAGYGLGTKYGGGSRTAAVAGAAVLGAASLAGAAAVNSVVPDVAAVGLHNYVAGCDDPTKLETGDVEAIAKKYGVSTEDAAFKSELCDLYGSFVYSVLPPGHEDLKGNEVEAIIKFKRALGLNDVDAANMHMAIGRRLYKERLNAFQKLIFVSNLVFGDASDFLLPWKHLFGITDYQIDIAMRENAKTLYASELKSIGRGLDIGTLIELRRSQLAYKLFDEVAADMFREHAKKLILENIASALAILKSQPSTAITPAQVIDEVNSIIAFNSLLRVLSKFPQGDRFARGLGPISLGGEYDHELMVDDLKILYTAYAREV…	AT-rich interactive domain-containing protein 1	Brachypodium distachyon	DNA modification	N	nucleus	347794	347240	292830	359062	336731	665401	634933	347063	293425	485205	487581	588866	355539	481215	478300	1.36182e+06	1.93509e+06	666487	488385	1.11294e+06	361889	407495	365239	321860	364121
Bradi3g32215.1	0.012786	0.0194676	0.0375134	0.0262714	0.010864	0.00691417	1.58379	1.44873	1.44873	1.47671	1.54721	1.58379	MLPSRRLLQQNTGNPGRIPGIPAADPPAGVSSDVVVILAALLCALICVVGLAAVARCARSRRNSTTGDNASYPSESPAHAAAGSGGGTHGGSTASVTTTTTTTSTASSKGLKKKALKALPKLAYADAVAAAAAARGALPAAGDDDDDDEEGRKKKAEEILSECAICLSEFGEREEVRVMPQCGHGFHVACVDAWLRSNSSCPSCRRPIVLHDPTPPPKRCRKCEDIILDAVVAASASSSSSSAVVSSHRGHHGGHGGGGFLP	probable E3 ubiquitin-protein ligase	Brachypodium distachyon	protein destination and storage	Y	PM	34612.8	24354.8	19764.1	29056.3	26947	40620.7	46768.8	32257.3	36509.4	39039	38529	41436.9	32885.1	46321.1	39793	38402.5	37588.2	41693.9	49086.1	41692.7	48184.7	34668.1	40872.7	46988.2	42678.4
Bradi3g34090.1	1.01452e-10	1.07617e-08	1	0.999851	3.67365e-06	1.46747e-11	63.6922	1.01202	1.01202	1.45135	30.5863	63.6922	MGNIAKDLTAGTVGGVANLVVGHPFDTIKVKLQSQPSPAPGHLPKYAGALDAVKQTIAAEGPRGLYKGMGAPLATVAAFNALLFAVRGQMESLLRSEPGAPLTVKQQVVAGAGAGFAVSFLACPTELIKCRLQAQSSLAEAAAASSVALPKGPLDVAKHVMKDAGLKGLFKGLVPTMGREIPGNAIMFGVYEAVKQYMAGGQDTSSLGQGSLILAGGLAGGALWLTVYPTDVVKSVIQVDDYKKPRFSGSIDALKKIVTADGVKGLYKGFGPAMARSVPANAATFVAYEITRSAMG	mitochondrial carnitine/acylcarnitine carrier-like protein-like	Brachypodium distachyon	transporter	N	mitochondria	2637.89	3494.14	4679.94	1835	3161.74	2687.44	3644.32	3439.45	3027.77	3199.75	4091.15	4675.14	5458.07	4130.82	4588.8	116654	68042.1	95255.1	106873	96706.1	167562	183184	240247	214521	201378
Bradi3g34980.1	0.00973607	0.015219	0.00431069	0.212041	0.0103601	0.147962	2.05265	1.50634	2.05265	1.50634	1.9323	1.56263	MQAFLSSSSILANPCPRSLFPRPSTQSQLLLSSVSGARTNAAAAASARRSSGRCVATPASSSPAVAAVATDVPAKMKAWAYDEYGDTGVLKLDEAVSVPAVGDDQVLVRVAAAALNPVDSKRRMGKFKATDSPLPTVPGYDMAGVVVKVGSQVKSLKEGDEVYGHISEKVLEGPKQFGSLAEYTAVEEKLVALKPKNIDFAQAAGLPLAIETAHEGLERAGFSAGKSILVLGGAGGVGSLIIQLAKQVFGASKVAATASSPKLELLKSLGADVAIDYTKENFEDMPEKYDVVFDAVGQGDKAVKVVKEGGSVVVLTGAVTPPGFRFVVTSDGSVLAKLNPYLESGKVKPVVDPKGPFSFPQVVEAFSYLETGRATGKVVISPIP	quinone oxidoreductase-like protein At1g23740, chloroplastic-like	Brachypodium distachyon	metabolism	N	chloroplast	30829	23681.8	32826.8	59428.9	36691.6	83054.9	78814	80942.1	58449.4	75315.1	57424.8	52501.2	41894	69260.9	55270.2	62532	76039.1	59637.1	85389	70899.3	47114.8	47861.2	82595.5	51769.8	57335.3
Bradi3g35700.1	0.000591684	0.0013303	0.303234	0.390071	0.00130696	0.647476	2.10416	0.733035	1.40928	1.36726	2.10416	0.733035	MSFNDDEPIVAPPNSGPRPTPIVAGRVQLVSKNNREAPLEENTQKVMLELTGGDSTADRSGLDLVAVLDVSGSMQGEKIDKMKTAMQFVVKKLSTIDRLSIVTFSDAASRLCPLRQITDASKADLQGIVDGLKPGGNTNITDGLVTGLKVLADRKLSSGRVVGVMLMSDGQQNRGGDAAKVAISGNVPVYTFGFGSDYDPTVLNAVAKNSMGGTFSVVDDVGALSMAFSQCLAGLLTVVVQDLKLTVTRVEDESEIQKVTAGNYPQEEDAGSVTVSFGDLYSKEVRKVIVDLLLPAIESDRGADILEVTYSYKTNGKLFDAPPATVTVSRTGAVPGDSPADDPPVVQTEVARLKTVTMITEARAMADGQKLGDARDKLVEAQNGLEDVLEQSNPVVEML…	probabale E3 ubiquitin-protein ligase	Brachypodium distachyon	protein destination and storage	N	unknown	120697	144382	108506	98574.1	118040	232556	232371	105259	95217.1	166351	137611	188928	150793	168232	161391	225321	294151	237934	236092	248375	106124	57520.6	84416.2	98048.6	86527.4
Bradi3g36520.1	8.1041e-05	0.000241334	0.0183438	0.000343008	6.27551e-05	7.26395e-05	3.41075	2.25858	2.25858	3.01664	3.31322	3.41075	MAATPAPLSLSASALSARLRLAAPASRAASARRRGPMVVRAKIREIFMPALSSTMTEGKIVSWSAAEGDRVTKGDAVVVVESDKADMDVETFYDGIVAAVLVPAGESAPVGAPIALLAESEEDVALAVAQAQALSSGQAQQAPPPSDADAPPPPSPPPAAAAPAPVAAGRRVLPRRRLRSWPSSTGGPCQAGIQPKPKVAPPTAAAPVAAPSVRAVPQASVLPPVPGATVVPFTAMQAAVSKNMVESLSVPAFRVGYPILTDKLDELYEKVKPKGVTMTVLLAKAAAMALAQYPVVNASCRDGASFTYNSSINIAVAVAIDGGLITPVLEQADKLDIYLLSQKWKELVKKARAKQLQPNEYNSGTFTLSNLGMFGVDRFDAILPPGQGAIMAVGASKPT…	Dihydrolipoamide acetyltransferase component of pyruvate dehydrogenase complex, mitochondrial-like	Brachypodium distachyon	energy	N	mitochondria	56465.1	40302.8	46725.1	44976.6	47117.4	85040.9	118464	113833	108337	106419	142491	138793	178511	108749	142136	133527	130209	187263	173441	156110	195326	191754	133355	122389	160706
Bradi3g37140.1	0.0291692	0.0399079	0.795849	0.974039	0.035955	0.910791	2.96473	0.558198	1.59144	1.30431	2.96473	0.558198	MASAITISSVSAQAALISKPRNHGITSYSGLKASSSSISFETGSSFLGKNASLRASVTPRIVPKAKSGAQISPEASYKVAVLGAAGGIGQPLGLLIKMSPLVSELRLYDIANVKGVAADLSHCNTPSQVLDFTGPGELADCLKGADVVVIPAGVPRKPGMTRDDLFNINAGIVKSLIEAVADNCPEAFIHIISNPVNSTVPIAAEILKQKGVYNPKKLFGVSTLDVVRANTFVAQKKNLKLIDVDVPVVGGHAGITILPLLSKTRPSVTFTEEETEELTKRIQNAGTEVVEAKAGAGSATLSMAYAAARFVESSLRALAGDPDVYECTYVQSELTELPFFASRVKLGKNGVESIISSDLEGVTEYEAKALEALKPELKGSIEKGIEFVHKQQGATASV	Malate dehydrogenase	Brachypodium distachyon	energy	N	cytosol, mitochondria	2337.48	2000.09	1885.28	3985.79	2552.16	5553.98	4996.35	3828.06	1868.09	4061.62	4000.99	4885.14	3326.61	1102.48	3328.8	7413.06	14262.9	5153.14	3436.82	7566.48	1307.15	48.0862	1958.87	2384.33	1424.61
Bradi3g39800.1	3.6064e-08	5.79171e-07	0.99998	0.891189	5.08788e-08	0.000893287	163.856	2.03622	2.03622	11.3103	163.856	71.2214	MAMAMGKQHGSSPEDDDVEAPLLPVDPATTTGRRPASSSSSRLQALFAHRYPAILSGPAACLAVCLLADLDLGVHGAAPRNMLGALAWVFLWWVTDAVPLAVSSMAPLFLFPALGVASADAVAAAYMDDVIALVLGSFILALAVQRYHIHRRLALNIMVRFCGDPVRPAWLLLGVTGTTAFVSMWIHNTACTVMMMPVATGILQRFPRGTGGNGEELAEVRRFSKAVVLGVVYASAVGGMATLTGTGVNVILVGMWSAYFPEQRPITFSSWMAFALPLALVVFLALWVTLCLMYCSKDTGKALSGYLDRSHLRTELSLLGPVAFAEKMVLAVFGGLIVLWMTRTLTNDIPGWGVLFHNKVGDGTVTIMMATLLFIIPSGKSEGEKLMDWDKCKDLQWSI…	tonoplast dicarboxylate transporter-like	Brachypodium distachyon	transporter	N	tonoplast	80.5063	207.895	95.9803	65.0966	112.37	628.296	45.634	203.773	37.5335	228.809	1285.2	491.901	2413.02	893.628	1270.94	13253.1	15692	20351.5	24353.2	18412.4	8520.84	7200	9959.32	6332.33	8003.12
Bradi3g41310.1	0.000115169	0.000321662	0.891575	0.662913	0.0311321	0.0010529	3.13018	0.499607	0.677678	0.499607	2.37464	3.13018	MDPDAVAKAFVQHYYQTFDANRGALVGLYQDGSMLTFEGDKFLGSAAIAGKLGSLPFQQCHHKIDTVDCQPSGPQGGVLVFVSGAITTGPGEHPLKFSQMFHLLPAGGSFYVQNDMFRLNYG	nuclear transport factor 2-like isoform 1	Brachypodium distachyon	transporter	N	nucleus	5412.4	26291.2	37875.5	25185.8	23691.2	11895	18582.6	17571.4	16171.1	16055	14308.4	11738.9	18001.4	3296.48	11836.3	63648.2	40246.6	38902	82236.3	56258.3	48069.8	72153.5	104867	71541.5	74157.9
Bradi3g45140.1	1.67994e-05	6.49353e-05	0.989043	0.300836	0.000193687	0.0059883	1.70417	0.781485	1.04554	0.781485	1.70417	1.48674	MACSFATSTVVSSTPTPKPLATALTPQCLSISRAPLATVRPLRLAAASRSARTSGFVARAGGVDELPLVGNKAPDFDAEAVFDQEFINVKLSDYIGKKYVILFFYPLDFTFVCPTEITAFSDRHDEFEKINTQVLGVSIDSVFSHLAWVQTDRKSGGLGDLKYPLISDVTKSISKSFGVLIPHQGIALRGLFIIDKEGVIQHSTINNLAIGRSVDETMRTLQALQYVQENPDEVCPAGWKPGEKSMKPDPKGSKEYFAAI	2-Cys peroxiredoxin BAS1, chloroplastic-like	Brachypodium distachyon	disease/defence	N	chloroplast	25735.2	17795.8	20202.1	31226.5	23739.9	26790.2	26541	24913.8	21039.5	24821.1	21702.3	18085.3	13770.9	20651.1	18552.4	48518.7	40981.9	35224.7	37102.1	40456.9	34079	37726.6	35566.3	33808.7	35295.1
Bradi3g45870.2	0.000286669	0.000709571	0.00604148	0.000124197	0.00238341	0.000302673	6.68698	4.72734	4.72734	6.68698	5.18108	6.19147	MGGSNYDDDWVLPSADITVVLVGKLGYGKSATGNSILGREAFVSEYSHASVTNTCQMGSTMLKDGRTINVIDTPGLFDMSVTPEDAGKEIVKCMNMAKDGIHAVLMVFSATSRFSREDSSTIETIKVFFGEKIVDHLILVFTYGDLVGENLLKNMLSNAPEYLQKVVELCKNRVVLFDNKTKDQRIQAKQLEMLLDVVDSVSANNGGKPFSDQMLTRIKEVHEREKEVHDVMGYTEEQISELKKEIHRTRDEQLASITAMVEDKLNCTVEKLQNQLMEEQNARLEAERVALEARVRSDEEIRKLKESLKEAQRENEEFRRLAHNNKCTIL	immune-associated nucleotide-binding protein 9	Brachypodium distachyon	disease/defence	N	chloroplast, mitochondria	16.7647	58.153	74.6034	64.7956	53.5792	299.307	301.859	282.894	129.088	253.287	436.425	373.527	314.723	308.456	358.283	325.13	227.064	203.375	354.823	277.598	409.501	276.037	427.709	213.687	331.734
Bradi3g47690.1	0.00645497	0.0106844	0.0128713	0.00354646	0.0260298	0.40713	1.93905	1.342	1.78589	1.93905	1.70496	1.342	MASLAAASASTALLFPPSTSSSKPRLPLSTSLGFSTPARSRRAAAGAGAGSSGRRPGLLVVRAARAKFERTKPHVNIGTIGHVDHGKTTLTAALTMVLASVGGSAPKKYDEIDAAPEERARGITINTATVEYETETRHYAHVDCPGHADYVKNMITGAAQMDGAILVVSGADGPMPQTKEHILLAKQVGVPSIVVFLNKKDQVDDEELLELVDLEVRELLTAYEYNGDDVPIISGSALKALEALMATPGIKRGENEWVDGIFTLVDAVDAHIPVPQRQTDLPFLLAVEDVFSITGRGTVATGRIERGTVKVGDPVDLVGIRETRNATVTGVEMFQKTMDDAIAGDNVGLLLRGMQKEDIERGMVLAKPGSITPHTKFEAVVYVLKKEEGGRHSPFFPGY…	elongation factor Tu, chloroplastic-like	Brachypodium distachyon	protein synthesis	N	chloroplast	118460	78943.1	128950	194523	130219	238470	240075	243049	208631	232556	260582	225650	230147	293623	252501	228009	321165	183844	155057	222019	166585	182064	187218	163148	174754
Bradi3g47820.1	3.36397e-08	5.60246e-07	0.999999	0.999994	2.33422e-06	4.70812e-08	49.5764	0.859272	0.859272	1.26517	38.4649	49.5764	MIKLRYSKRLFKRSSSRASACFGGGHGSVAGGGGGGGGEEIEWEVRPGGMLVQKRDGGRAEEVIVVRVSTGFSWHDVSIGATCTFGELKVMLSMATGLEPREQRLLFRGKEREDTEHLHMVGVRDKDKVLLLEDPALKDMKLRAAARTAAARRVVQSPCHPFIQV	BAG family molecular chaperone regulator 1	Brachypodium distachyon	disease/defence	N	cytosol, nucleus, mitochondria	2480.94	2037.58	1885.43	2499.17	2225.78	1268.07	2618.28	1989.16	1774.69	1912.55	2117.57	3237.4	3385.99	2522.99	2815.99	79041.6	70836.3	79568.2	113011	85614.3	79218.4	94339.1	147209	120618	110346
Bradi3g49260.1	0.000730978	0.00161126	0.86641	0.288617	0.000331309	0.0138847	2.52077	1.21864	1.21864	1.5044	2.52077	1.99103	MECENGLVGSLNGEGLCMSAPPRAAADPLNWAKTAEELAGSHLEEVKKMVAQFRMPLVKIEGATLGIAQVAAVAAGAGEARVELDESARGRVKESSDWVMNSMMNGTDSYGVTTGFGATSHRRTKEGGALQRELIRFLNAGAFGTGTDGHVLPAEATRAAMLVRINTLLQGYSGIRFEILEAITKLLNANVTPCLPLRGTITASGDLVPLSYIAGLITGRQNSVAVAPDGSKVSAAEAFKIAGIEHGFFELQPKEGLAMVNGTAVGSGLASTVLFEANIQAILAEVLSAVFCEVMTGKPEFTDHLTHKLKHHPGQIEAAAIMEHILEGSSYMKEAKKQGELDPLMKPKQDRYALRTSPQWLGPQIEVIRFATKSIEREINSVNDNPLIDVSRGKAIHGG…	Phenylalanine ammonia-lyase	Brachypodium distachyon	secondary metabolism	N	cytoplasm	5774.95	3167.5	4189.16	3648.56	4195.04	4349.91	4939.87	4822.05	6337.1	5112.24	6649.08	5593.99	5839.56	7161.38	6311	14476.2	10872.7	9508.54	7441.61	10574.7	11176.3	7736.53	7744.42	6752.6	8352.45
Bradi3g49730.1	2.01918e-05	7.58454e-05	0.00423976	1.2427e-05	1.79581e-05	8.23055e-05	1.94229	1.5313	1.5313	1.94229	1.89423	1.77043	MGCGASKWKDPGSRRQGRPRSVGEMVIFLPGLRVPRTVDFSQSFGDHLDKSIVERLSALRARVVAMSMQESVVALKKPRRGSTTRHGGSGTANLLQALEEYLPVLLGLVKSSELRNKVQFVWANQEDDAEETAMTDAWYEVLSVLHLMAMVCFLQANYLLLPRSYGDGYGPRVSEESRRATVDVFLKAAGYLDCAFHQVLPQIPPEKRRELPVDIVEGNLKALSLQGLGQGVDMQLGLAIDNPKATLAVKRRLACEMIKYWQQIKDSIPELPLTDGWGKKHTLFVKWKYAEAKASAYYFHGLILDEGDTEKSDEMAISSLQASEEFLKESKKASEAFHSTPPTSRISIPFGTTKYLLDRIPRDTISKLQDNQHLYTQEGTSNTGISRMITPPPPLPDFP…	endosomal targeting BRO1-like domain-containing protein	Brachypodium distachyon	protein destination and storage	Y	PM, endosome	12253.9	10865.2	13323.1	17315.6	13439.4	21341.7	16750	20905.5	23321.8	20579.8	24698.4	28423.2	25903.1	25388.4	26103.3	22059.2	29957.1	25133.4	24680	25457.4	21609.6	23298.8	25642.6	24623.4	23793.6
Bradi3g51200.1	8.62845e-07	6.92844e-06	0.000720888	5.87002e-07	2.31065e-05	2.65029e-05	1027.29	482.684	482.684	1027.29	652.883	669.986	MEDERSTQSHQGGEADQVEVTDRGLFDKFIGKKKEEEDKKQEEVLVTGMEKVSVEEPEVKEEEHQDGEKKESLFTKLQRSSSSSSSSSDEEEEVIDDNGEVIKRKKKKGLKEKIKEKLPGHKDTETAAPTPAPPAPVVTHGGHHDDGAVAVEKIDEVKTEAPVAPEEEKKGFLEKIKEKLPGGHKKPEEAAAVPAVTHAAPAPVHAPAVPAATEEVSSPEKKGILGKIMDKLPGYHKTPGEEDKAAAGEHKTTA	dehydrin COR410-like	Brachypodium distachyon	disease/defence	Y	PM, cytosol	0	36.1246	0	60.1607	24.0713	17374.1	8570.58	8403.97	12126.6	11618.8	20260.3	21171.2	25822.4	31658.9	24728.2	17168.4	16364.4	12104.8	17225.4	15715.8	13934.5	16504.1	14349.3	19721.9	16127.4
Bradi3g52130.1	0.0065806	0.0108606	0.934403	0.739451	0.0258205	0.0403606	1.55308	0.893257	0.893257	1.17388	1.55308	1.5122	MPVAASAIYFLNLRGDVLINRLYRDDVGGNMVDAFRMHIMQTKELGTCPVRQIGGCSFLYMRISNVYIVIVVSSNANVSCAFKFVVEAVALFKSYFGGTFDEDAIRNNFVLIYELLDEIMDFGYPQNLSPEILKLYITQEGVRSPFSSKPSDKPVPNATLQVTGAVGWRREGLVYKKNEVFLDIVESVNLLMSSKGNVLRCDVTGKILMKCFLSGMPDLKLGLNDKIGLEKEAQLKSRPAKSGKTIELDDVTFHQCVNLTRFNSEKTVSFVPPDGEFELMKYRITEGVNLPFRVLPTIKELGRTRMEINVKVKSVFGAKMFALGVVVKVPVPKQTAKTSFQTTSGKAKYNASIDSLVWKIRKFPGQTEATMSAEVELISTMGEKKLANRPPIQMEFQVP…	AP-2 complex subunit mu-like isoform 1	Brachypodium distachyon	intracellular traffic	Y	PM, golgi apparatus	28541.3	19733.5	21206.1	18961.7	22110.6	16141.5	21392.5	18481.3	22986.7	19750.5	30097	33600.5	22527.3	17595.8	25955.2	27314.4	26247	40833.4	42963.4	34339.5	32738.6	32457.7	34326	34220.6	33435.8
Bradi3g52400.1	0.00177246	0.00349767	0.0232283	0.335311	0.000477546	0.0561417	1.78636	1.24646	1.47421	1.24646	1.78636	1.40468	MAICSAHTTTSLRSPCTTISNTGLRQNQVILFTTRSSRRGSTRHGARTFQVSCTAEKPIIIGLAADSGCGKSTFMRRLTSVFGGAAEPPKGGNPDSNTLISDTTTVICLDDYHSLDRTGRKEKGVTALDPKANDFDLMYEQVKAIKEGKAIEKPIYNHVTGLLDPAELIQPPKIFVIEGLHPMYDQRVRDLLDFSIYLDISNEVKFAWKIQRDMAERGHSLESIKASIEARKPDFDAYIDPQKQYADAVIEVLPTLLIPDDNEGKVLRVKLIMKEGVKYFNPVYLFDEGSSISWIPCGRKLTCSYPGIKFSYGPDTYFGQEVSVLEMDGQFDRLDELIYVESHLSNLSTKFYGEVTQQMLKHSDFPGSNNGTGLFQTIVGLKIRDLYEQIIAERAGVPA…	phosphoribulokinase, chloroplastic-like	Brachypodium distachyon	energy	N	chloroplast	225748	239997	305845	389915	290376	472618	548501	367335	323846	428075	376507	416188	309671	345408	361944	539772	551431	500320	483343	518716	388836	395623	421762	425316	407884
Bradi3g54690.1	6.60087e-08	9.36993e-07	0.626766	0.100335	6.2944e-09	7.9281e-06	5.816	1.53713	1.53713	2.11378	5.816	4.87974	MVALVRPSVLPVCAVTGGGGKDKWTPRQQQSWWGRSKQSLPHQPRRNGERGGGGGGGALDQVLGVLRRDSEFLQAAAGAPLRDVLWLRFLENKKQRRKQPKPKPAQQEQEEEEEASARRAPAFPPPAYPPALSCVELMAADLQALKVYVGSSKREFVHRLLGSKQQPQSQQQCIKSKPVLQKQFEPKPKEQQQQALQPPAFPPHSYPPGLSCMELMMADLAALKLYISYYYAILTTPLPQHYDPDLLAQYFVSRPHILAFRTVQILLAFVSAAVKVQISKRMNLTTDATYRSSISNEGFNASQYMVGQLLKDTFLDLGPTFVKVGQSLSTRPDIIGSEICEALSELHERVPSFPREDAMKIIEGEFHRPVSQVFSYISDEPVAAASFGQVYQGRTFDGA…	protein kinase predicted protein	Brachypodium distachyon	unclassified	N	unknown	3174.6	1114.94	1402.74	984.235	1669.13	4692.5	873.48	3156.89	1539.77	2565.66	3839.7	1963.15	4214.77	4095.07	3528.17	8675.67	10439.1	9902.13	9813.76	9707.66	7187.49	8802.04	8758.45	7831.7	8144.92
Bradi3g56070.1	4.5121e-06	2.35012e-05	0.999868	0.00172708	0.000109459	6.60802e-06	2.05202	0.982791	0.982791	1.66815	1.88621	2.05202	MTPPVALRNELEGISRSARVDLFRGVSCNIEKEVLATLANGQDSHASETNAGFRVTDIRLPSGDAYSGTLLGSTPEGSGRYTWSDGCIYDGEWRRGMRHGQGKTTWPSGATYEGEYAGGYIYGEGTYTGHDNIVYKGRWKLNRKHGLGCQTYPNGDMFQGSWIQGEIQGHGKYTWGNGNTYTGNMKNGKMSGKGTFTWKNGDSYEGNWLDGMMHGYGIYTWNDCGYYVGTWTRGLKDGKGTLYPRGCRVPASDELYINNLRNRGVLPDLRRQNHGSRILHSSSVDMGNMKVGLNRGSSGSSSRRNSSEQPKNVSLERRWSLEVAIEKFIGHETSDNSGLESYENTDDSDLPILEREYMQGVLISEVVLNRSFSGSSKKAKRRQKKMVIKKPGEAIIKGH…	Phosphatidylinositol-4-phosphate 5-kinase 9	Brachypodium distachyon	signal transduction	N	PM	33934.6	30975.6	33738.1	21995.6	30161	29148.9	35597	22676.8	31145.1	29642	57508.9	46095.1	45048.4	52599.3	50312.9	63942.1	63228.4	55876.3	44512.9	56889.9	58178.7	55962.2	68947.9	64475.1	61891
Bradi3g59710.1	2.06181e-06	1.34366e-05	0.174227	0.00151009	8.74684e-08	0.00784066	2.22877	1.26797	1.26797	1.58554	2.22877	1.48203	MQMPFCPKLWDRSPTPPENSIAIDGTVVVTNNFGLSAPGKSTTLRLFSGTQIDHQTRKGKLSGEAALRGGKKSKHGKTSTTTYHVTFVVDAEFGTPGAVVVKNGNRNDHFFLRHVQLELAADRSLHFECNSWVYPYKKSNSDRLFFINTSYLPAKTPEALVLLRDEELRSLRGNGRGERKDWERIYDYDCYNDLGNPDKPDHVRPVIGGTRTHPYPRRCRTGRPLSKTDEVTETRKHMINLDFYIPPDERFSPGKLAEVLTLAVQAVTHFVVPEVRTLVHGNDFRSMEQLRNDLYSKPAQPAVDGEVLEQLKSSVPSHKTYKKVAKAVKENPVKFPTPQVIQHDHEAWRTDEEFAREMLAGLNPVTIKRLQEFPPVSSGGKKSSITAAHIESQLEDVTI…	Lipoxygenase	Brachypodium distachyon	metabolism	N	chloroplast, mitochondria	179350	170750	175082	119411	161148	232740	241662	158620	184300	204331	249397	248238	271238	253152	255506	385986	319506	402286	328872	359163	240470	212523	251554	250758	238826
Bradi3g59830.1	0.00177346	0.00349767	0.914792	0.062837	0.000891018	0.0547827	4.55802	1.47237	1.47237	2.91501	4.55802	2.96813	MVTPVSLPRRLRGFRDRGGAVSSEIPLTLTVRRTPCGQQQQQPEVPAQFLCPISLEMMRDPVAAPTGITYDRESVEAWLNRGRSTCPVTGRPLRLEDLVPNHATRRLIQDWCVASGMADERAPTPRVPLSALDASELMGAVAAAAAPGDGAACRELVARAMALARDSDRDRRCLASAARAGAALSSAFCSLSRHDAQTASSAGVLEEILAAIVVFSSPLDADSMRRIACSPSSLSSVVSIMSNADLSLPHARAAAAVVLREIASSSDAQCLDAMTNTHAIYVALVNILQNPVSPQATKAALVTAYYLVTARGELAAPHMAELGIVRHLIELLVDCDKGTTEKALAALDAMLLKCEEAKGEARSLRALAVPVLVKKMHHVSDMATEFAVSALWRLCKNDD…	RING-type E3 ubiquitin transferase	Brachypodium distachyon	protein destination and storage	N	multiple localizations	2812.95	3021.35	3232.8	3372.88	3109.99	4560.3	3660.39	4524.12	5571.44	4579.06	6906.26	7844.49	13135.6	8376.37	9065.68	13315.3	7328.49	13791.7	22266.2	14175.4	5813.5	9477.09	10007.3	11625.6	9230.86
Bradi4g00330.1	0.015259	0.02272	0.0824182	0.0824151	0.00320165	0.114949	1.56285	1.30921	1.33368	1.33409	1.56285	1.30921	MGEAAAAAAEDIPKSLVVAPAPRPRKGVASWAVDLLERLAVRLGHDKTQPLHWLSGNFAPVVDETPPAPDLPVRGHLPECLNGEFVRVGPNPKFVPVAGYHWFDGDGMIHAMRIKDGKATYVSRYVKTSRLKQEEYFGGAKFMKIGDLKGFFGLFMVQMQELRKKLKVLDATYGIGTANTALVYHHGKLMALSEADKPYVVKVLEDGDLQTLGLLDYDKRLKHSFTAHPKVDPFTDEMFTFGYSHEPPYCTYRVITKDGVMLDPVPITIPESVMMHDFAITENYSIFMDLPLLFRPKEMVKNGEFIYKFDPTKKARFGILQRYEKDEKNIRWFELPNCFIFHNANAWEEGDEVILITCRLENPDLDKVNGHQNEKLENFGNELYEMRFNMKTGAASQKQ…	carotenoid 9,10(9',10')-cleavage dioxygenase-like	Brachypodium distachyon	secondary metabolism	N	cytosol	176214	159505	218725	257320	202941	300910	310784	214444	256498	270659	280673	312296	203395	286602	270741	358712	321373	308272	280305	317166	274417	236826	284468	267056	265692
Bradi4g00530.1	1.44693e-07	1.74704e-06	0.0184677	1.68562e-05	8.68134e-08	7.49983e-06	4.19966	1.92468	1.92468	2.88926	4.19966	3.15247	MDQGNKLRAQQEEGQELADQHNKAMGSMDMETTTKAAVFSDAVVHNYRGWKAMPYVIGNETFEKLGTIGTLSNMLVYLTTVYHMPSVTAATLLNVFSGTSNLATVVGAFVSDTYLGRYTTIAAATISSFLGMLILTLTAALHSLHPPSCPPNSTSCHGPSSSQLAALMASFFFLVIGAGGIRPCNLAFGADQFDPRTADGRRGIASFFNWYYFTFTIAMMLSATVIIYLQSSVNWALGLAVPALLMGLSCAVFFMGSRLYVRVRPEGSPFTSFAQVLVAAVRNRKLHLPAGAGGTRELLFDPPHQSKLVSKLAYTDQFPCLDKAAAMVAIASPEGEKKERNPWRLCTLQQVEEVKCLARIIPVWSSGIVYFIVLSQLGNYVVLQAAQTDRRITASSGFE…	probable peptide/nitrate transporter At5g62680-like	Brachypodium distachyon	transporter	Y	PM	288240	227879	197885	217400	232851	606414	443961	362312	379968	448164	694370	636878	663405	696416	672767	891532	814838	1.15849e+06	1.04673e+06	977896	843056	700346	723077	669742	734055
Bradi4g01640.1	0.0151692	0.0226114	0.997027	0.998056	0.0255202	0.914118	2.34143	0.71859	1.10927	0.902148	2.34143	0.71859	MAMASTRAPSSAGSLAPGRRTLRPRSPAGLPGFLGLSPSKPTLRRPLALVSGARPCPPLFRCAASSSPAAARPASAPRFIQHKKEAFWFYRFLSIVYDHVINPGHWTEDMRDDALQPADLHSRKLKVVDVGGGTGFTTLGIVKHVEPENVTLLDQSPHQLEKARQKEALNGVTIIEGDAEDLPFPTDTFDRYVSAGSIEYWPDPQRGIKEAYRVLRLGGVACLIGPVHPTFWLSRFFADMWMLFPTEEEYIDWFKKAGFEDVKLKRIGPKWYRGVRRHGLIMGCSVTGVKRERGDSPLQLGPKAEDVSKPVNPITFFFRFLVGTICAAYYVLVPIYMWIKDQIVPKGMPI	37 kDa inner envelope membrane protein, chloroplastic-like	Brachypodium distachyon	energy	N	chloroplast	54546.6	29683.5	26292.7	26801.8	34331.1	55034.1	44702	29517.7	23075.6	38082.3	34419.2	32407.8	19186.6	37873.5	30971.8	112798	119720	51563.5	37454.3	80383.9	22952.4	18003	29988.1	27736.7	24670
Bradi4g02780.1	2.33956e-08	4.32337e-07	0.999962	0.994156	2.81712e-09	1.23444e-06	10.1547	0.924749	0.924749	1.27209	10.1547	7.93983	MAVVATQMAVDMEAIQEATDLEAAAADHDLAMGDENVEEAEVGEGGESLVPETAILDLDFDADEEVQVIQRCVIEKYYSMRRVKAATLLLEFKRIWQTCADMKFKDLEDNMYVITFDAEGDYQHVVHGGPWQLRGEVLIVAPVDGTVPLMEIPVDAMPIWIHIDKVPPMLQNDQIGRALGSFLGRVLEVDAMANGQVGAYLRVRVEISLRQPLQDEVAIRIKGKLTTYKVQYERLPNLCFHCGLVGHGKTECLKEQQGAKSRGLDARLRCSPVRKADRRDGVIRADSAARRKLMLPFGAALSSNRSHASSRRMSQEQQSADEIVGEVELSNKVNELSVHDEGVHDDECTESPPPNHKGADK	EKC/KEOPS complex subunit TPRKB	Oryza sativa Japonica Group	transcription	N	nucleus	1002.91	522.966	353.558	285.799	541.307	1035.07	267.68	527.25	172.292	500.574	492.918	613.141	1058.54	589.765	688.592	4028.82	5808.02	6404.83	5745.6	5496.81	4635.58	5486.68	3039.83	4029.47	4297.89
Bradi4g05210.1	5.57247e-06	2.74187e-05	0.716259	0.96402	4.37251e-05	0.00023257	3.543	0.795093	1.41459	0.795093	3.543	3.40773	MAAEAGATAAAGGEGGAAAPAGGKMTMVVGVDESEHSYYALQWTLRHFFASPDPALQQYRLVVVTAKPTAASAVGLAGPGAADVLPFVEADLKRSAMRVIDKAKELCAQVSHAVFEVMEGDARNVLCEAVERHHAEMLVVGNHGYGAIKRAVLGSVSDYCSHHAHCTVMIVKKPKHKH	universal stress protein MJ0531-like	Brachypodium distachyon	disease/defence	Y	PM	19143.9	9938.44	8256	10201.9	11885.1	17357.4	19296.8	14288.5	16307.4	16812.5	10488	10808.4	8669.55	7833.04	9449.74	58088.4	34838.9	38225.2	37282.8	42108.8	35213	31790.2	54145.9	40855.4	40501.1
Bradi4g06310.1	4.45583e-07	3.98074e-06	0.999484	0.997377	3.0707e-07	0.000606182	362.296	7.59047	7.59047	11.0059	362.296	207.685	MPTVSVGRDRLFAALGRVYTQEEFEALCFEFGIELDDVTTEKAIIRKEKHLEEDGEADGEDEVIYKIEVAANRYDLLCLEGIARSLRIFIGAEATPLFKTSSIPRGSMLQMHVRPQTAQIRPYVVCAVLRGVTFDEVRYNSFIDLQDKLHQNICRKRTLVAIGTHDLDTLKGPFSYEALPPQEINFVPLKQEQKFRADALMDFYRSDMKLKKFLHIIENSPVYPVIYDSNRTVLSLPPIINGAHSAITLKTRNVFIECTATDLTKANIVLNTMVAMFSEYCENKFEVEPVEVVSSDGSKAIYPDLSCYKLEVSLSDIVGPIGISLDETQVISLLKKMQLQAELCPSNGEPRFSVSVPPTRSDILHARDLAEDVAIAYGYNNVPKSKPKSMTIGGRQPLN…	phenylalanyl-tRNA synthetase beta chain-like	Brachypodium distachyon	transcription	N	nucleus	77.8519	37.8434	0	0	28.9238	245.574	0	248.964	383.644	219.546	206.467	183.443	728.466	154.956	318.333	12406.6	5344.32	12248.4	11916.7	10479	4888.6	5310.43	8289.04	5540.13	6007.05
Bradi4g08030.1	1.37589e-05	5.59059e-05	0.00539997	0.0360405	1.85238e-06	0.00222456	2.42787	1.49738	1.66248	1.49738	2.42787	1.75086	MAPAMASLKSSLLLPSSPLSDFSGAALSMSTQNRRRSWQPRGARMQVAAAADSKNILVMGGTRFIGVFMSRLLVKEGHQVTLFTRGKAPVTQQLPGESDAEYAEFSSKVLHLKGDRQDFDFVKTNLSAKGFDVVYDINGREATEVAPILEALPNLEQFIYCSSAGVYLKSDLLPHFETDAVDPKSRHKGKLETESLLEKSGVNWTSIRPVYIYGPLNYNPVEEWFFHRLKAGRPIPIPGAGNQITQLGHVKDLATAFIKVLGNPAASKQVYNISGTKYVTFDGLARACAKAGGFPEPEIIHYNPKDFDFGKKKAFPFRDQHFFASVEKASKELGFTPEYDLVDGLTDSYSLDFGRGTFRKEADFTTDDMILGKKLVSV	chloroplast stem-loop binding protein of 41 kDa	Brachypodium distachyon	energy	N	chloroplast	162851	134316	163836	229007	172502	289790	345530	283951	227856	286782	262268	276888	231777	262273	258302	458539	477508	373183	366027	418814	327376	335334	264403	280996	302027
Bradi4g08500.1	3.73193e-05	0.000128731	0.882482	0.174096	2.2221e-05	0.00083057	2.82981	1.20155	1.20155	1.57422	2.82981	2.34868	MAPTVMASSATSVAPFQGLKSTAGLPVASRRSSNSLGSVSNGGRIRCMQVWPIEGIKKFETLSYLPPLSVESLLKQIEYLIRSKWVPCLEFSKVGFVFREHNSSPGYYDGRYWTMWKLPMFGCTDATQVLKELEEVKKEYPDAYVRIIGFDNTRQVQCISFIAFKPPGCEESGKA	ribulose bisphosphate carboxylase small chain PWS4.3, chloroplastic-like isoform 1	Brachypodium distachyon	energy	N	chloroplast	819980	998684	1.16841e+06	1.95717e+06	1.23606e+06	1.01914e+06	1.87196e+06	1.37232e+06	1.67735e+06	1.48519e+06	1.99289e+06	2.47735e+06	1.62986e+06	1.68322e+06	1.94583e+06	3.09049e+06	3.82778e+06	3.35564e+06	3.71738e+06	3.49782e+06	2.25979e+06	3.97935e+06	2.73558e+06	2.63773e+06	2.90311e+06
Bradi4g08900.1	3.41982e-08	5.62602e-07	0.996901	0.0590359	4.93051e-10	2.12295e-05	24188.9	555.431	555.431	5780.16	24188.9	15362.6	MEPQATIDVLTDDAIRDILRRLSLADLLRSALASHHWRRLAARCLPRAAPHLGYFFHPTAIGPPAPIPDPKIIDTPAEFAPLDASSPRLSLDFAPDASVFKVYDSHQGLLLLEPVVILPKGIIPRFLVLDPATRRRTLLPPPPRDTVPGDRRWRRTRHYVGSALLSRAHPSKLCFEVICFAIDDGHPRAWVASVDNGECCWRALPRDKELLVDFDPWWFEGRCVHAAGKIYWHICNSVHRFLQLDTATLKFSYLPVPAVLGYRFAKYRIGETPEDGRLCIVTDGEKQLQLWVRGEARWSDNGWLLERKIVDLRVLCDSVPGLTSDPRLRLLSVWPTDMDAARTGKVFIKTWGFGTYSFHLDTGKLERLSSKGGKDYGHPIFAYFLAWPPAFLASDY	F-box domain-containing protein	Brachypodium distachyon	unclassified	N	unknown	0	0	1.80058	0	0.450144	539.978	460.119	0	0	250.024	2285.88	1800.12	4011.77	2309.85	2601.91	10530.3	8286.99	12885.2	11851.5	10888.5	4346.44	6110.52	9431.05	7773.47	6915.37
Bradi4g09125.2	0.00611003	0.0101884	0.0870279	0.428769	0.00280915	0.950606	1.72134	1.09328	1.41761	1.24909	1.72134	1.09328	MSATFSSTVGAPASTPTSFLGKKLKKQVTSAVNYHGKSTKANRFTVMAKEVDESKQTDQDRWKGLAYDISDDQQDITRGKGIVDSLFQAPMGDGTHVAVLSSQEYISQGLRKYDFDNTMGGFYIAPAFMDKLVVHLSKNFMTLPNIKVPLILGIWGGKGQGKSFQCELVFAKMGINPIMMSAGELESGNAGEPAKLIRQRYREAADLIKKGKMCCLFINDLDAGAGRMGGTTQYTVNNQMVNATLMNIADAPTNVQLPGMYNKEENPRVPIIVTGNDFSTLYAPLIRDGRMEKFYWAPTREDRIGVCRGIFQTDNISDESVIKIVDTFPGQSIDFFGALRARVYDDEVRKWVSSTGIENIGKKLVNSKDGPVSFEQPKMTIEKLLEYGHMLVQEQDNVK…	ribulose bisphosphate carboxylase/oxygenase activase A, chloroplastic-like	Brachypodium distachyon	energy	N	chloroplast	2.20543e+06	2.02232e+06	2.82454e+06	3.52093e+06	2.6433e+06	3.77548e+06	4.40345e+06	3.41922e+06	3.39058e+06	3.74718e+06	3.37311e+06	3.57054e+06	2.71274e+06	3.55056e+06	3.30174e+06	4.58893e+06	6.08408e+06	3.83485e+06	3.69219e+06	4.55001e+06	2.69535e+06	2.98227e+06	2.96902e+06	2.91289e+06	2.88988e+06
Bradi4g13670.1	0.000109025	0.00031094	0.18914	5.58894e-05	0.00111942	0.0013249	1.88226	1.27948	1.27948	1.88226	1.68611	1.63281	MEGGKCDHPEHATAPCPPPSQGRLITVLSIDGGGIRGLIPSTIIACLESKLQEIDGPDARIADYFDVIAGTSTGALVTSMLAAPGENKRPLFAASELKDFYLENGPKIFPQKKLGFLNPAANLFGAVMGPKYDGKFLHDKIKKLTHNTTIAETVTNIIVPTFDVKFLQPVIFSTYEAKVDPLKNAHLSDICISTSAAPTYFPAHFFSTHDPDPKAEVKEREYHLVDGGVAANNPTMAAMSMITKEVLRKNPDFTHGNPAEYNNYLIISIGTGSAKMAEKYTAPACAKWGVLRWLYDGGFTPLIDIFSHASADMVDIHAAVLFKALRVKENYLRIQDDSLEGDTSSVDIATKKNMEALIEIGNGLLQKKVARVNIDTGMYETVEGEGTNEEALKRFAVKL…	patatin group A-3-like	Brachypodium distachyon	storage, disease/defence	N	cytosol	911505	881693	1.12494e+06	1.25483e+06	1.04324e+06	1.14919e+06	1.44389e+06	1.33228e+06	1.41389e+06	1.33481e+06	1.84018e+06	2.1526e+06	1.81684e+06	2.04498e+06	1.96365e+06	1.33915e+06	1.76288e+06	1.98505e+06	1.94898e+06	1.75902e+06	1.36694e+06	1.84506e+06	1.8338e+06	1.76784e+06	1.70341e+06
Bradi4g17230.1	2.25079e-06	1.43901e-05	0.735616	0.999998	1.07535e-06	0.00163791	4.86116	1.01824	1.47032	1.01824	4.86116	3.14323	MAAATMTVEEVRRAQRAEGPATVLAIGTATPANCVYQADYPDYYFKMTKSDHLADLKEKFKRMCDKSQIRKRYMHLTEEILEENPNMCAYMAPSLDARQDIVVVEVPKLGKAAAQKAIKEWGQPRSRITHLVFCTTSGVDMPGADYQLTKMLGLRPSVKRLMMYQQGCFAGGTVLRLAKDLAENNRGARVLVVCSEITAVTFRGPHESHLDSLVGQALFGDGAAAVIVGADPEEHVERPLFQLVSAAQTILPDSEGAIDGHLREVGLTFHLLKDVPGLISKNIEKALEEAFKPLGIDDWNSVFWVAHPGGPAILDMVEAKINLNKERMRATRHVLSEYGNMSSACVLFILDEMRKRSAEDGHATTGEGMDWGVLFGFGPGLTVETVVLHSVPITAGAATA	chalcone synthase 2-like	Brachypodium distachyon	secondary metabolism	N	nucleus, ER, vacuole	14114.1	3209.94	3311.15	2068.42	5675.89	4928.29	7306.98	12323.2	8822.95	8345.36	5373.14	4630.28	4405.55	8708.75	5779.43	23054.4	26994.5	31106.7	29210.1	27591.4	20245.5	19711.4	11451.6	19954.1	17840.6
Bradi4g21057.1	1.14415e-10	1.07617e-08	0.996268	0.997469	2.67239e-05	0	40.4505	0.343031	0.343031	0.406331	18.1005	40.4505	MTAMVKGCAGPSELHLKKELTALRKARFLRDPETCSSWRGPMSSRSCMTTSSIINHNEIVGNLTQKNMEPAVVPPKSEKKRKNVYLYNWRQHSNKSSESGMKFDEGERQASADWGLESPCISNVMDSRSDICLEVPVSIYSVQGSNSGTPVRRTVRRVKRSSFSKKGAMRNSTVSKLLDLHVNSGEQSEDTETYSEDNELLQKGGYFSRSTSPLFAASGCLSSSNPSKLLKMARREGSSFSCTPVSTSSYYRYRGRNPSTVGSWDATTAASIDEDGLNQSAQSRSQRFGLPYWSKRSKHKGSERSCSPSLSDTLRRKGSSLLCGSQTIHRRKRSSGSNRCGYLKKSSQGEPLLGDSCHFSYSSFDSASDGVSTIFGELDLEALSRLDGRRWSSCKSQDG…	protein STICHEL isoform X1	Brachypodium distachyon	transcription	N	nucleus	1511.43	395.882	181.565	195.63	571.126	248.685	241.07	21.3131	272.589	195.914	201.461	271.36	157.851	297.593	232.066	8576.64	7894.66	9190.6	15688.8	10337.7	19754.9	22547.4	24636.1	25470.9	23102.3
Bradi4g23510.1	3.3712e-09	1.03358e-07	0.999696	0.998192	1.36216e-10	7.18672e-07	473.396	6.52191	6.52191	9.70362	473.396	326.295	MATSKVVDDGGGTGDEGGNEFAALLTQASVAEASGGGGSLPLDDEIWQVRMKFESGHTVERYMGRLDLIYLNLLGLMESVGSGKDYYMHYVKEEGVGLRGPAMIDGNDKVKMMKIYQSSKLLNITVMKGRGYGLSPVKRAAEFYSNIPTVGRRKRKRPDVITIEDEEVAEAEQHIQTQSSVNMMAEAQVGGAVDKGKAPEAKQHIQTQASVNMMGEAQVGGAIDKGKAQVADDTSTEYDSEDFESDSNADADIDCGEYNVHQYKTQEMRSNVEDLYDPEPQLVSDIEVEDGQPMLNPERKKPTRKGPTTRSHASVGPSFIPDRIISSSEDSDPGPISDGDDDGAEGMSFVAPLRRKSRSKKQAKRIYYDESRQAAHEQFCLKLCFADVYQFRRGLVNLH…	geranylgeranyl pyrophosphatase synthase, chloroplastic	Brachypodium distachyon	metabolism	N	chloroplast	0	0	75.1368	0	18.7842	267.598	0	150.458	71.9787	122.509	0	331.97	301.219	95.9101	182.275	7682.35	7570.62	8336.16	11980.4	8892.37	4982.01	6910.72	7146.29	5477.78	6129.2
Bradi4g23530.1	8.86921e-09	2.02789e-07	0.976271	0.993509	3.21455e-08	1.31772e-07	14.5201	0.373293	0.373293	0.560212	14.5201	14.104	MAAVAATTTKDEDDVVAAATKATTTWLRWRPETRKELHSVAKENHKHGQHSQHSSDGSRAQERKRPRMVHIGLGLGLEASVWSWAWILARQRKSYQNLHATPAGESVKRRMRTKLFGVEACMGAKRGTFLPRVPSRLGMATSLLRFCKLGLVGPQHPSTYRHFSPGNAAGSGGGDLLLFLAIPAGRLIGLSASLCSRALSAFVGLLLLPPASLVGALRRAAPSLARAALAFAALAAAFAASLLLGFFLVRRCSVEGPVSVRRPLYFDYTEQQPSAAVSLAGAAASIPAGHSVKVSVALLLPDSDHNRQIGVFQIKAEAIAATGVPIATATRPYMLRYKSGAVRLAQSALAIVPLATGLMGESQSATIRDVLQYREEGNKKKRTGLVRVSLQPRAMTVAL…	seipin-1	Oryza sativa Japonica Group	lipid synthesis	Y	PM	1063.11	159.027	155.337	347.609	431.271	21.8928	357.114	216.773	48.1831	160.991	86.4424	306.082	204.665	369.224	241.603	5942.55	4727.51	6291.91	8086.45	6262.1	4790.23	5601.99	7827.29	6111.08	6082.65
Bradi4g23850.1	0.0104815	0.0162898	0.0834977	0.0348423	0.00893927	0.951796	1.63496	1.09518	1.43337	1.51458	1.63496	1.09518	MGIWGWPWGRRGLTGFGSASTAEDVAAGVDASQLTAIVTGATNGIGKETARVLALRGAKVIIPARTLESGMKVKESLSEEAPSLNLHVMEMDLSSLESVRSFARSFNVSHKHLNILINNAGIMACPFQLSKDGIELQFATNHLGHFLLTNLLLDKMKWTAKETGVQGRIVNVSSTAHRRSDGSGFDLNKLNDQSRYRPFRAYSHSKLANILHANELSRRFQEQGCDLTANSLHPGIIVTNIVRYTATNSMLISILSLAKTFLKDTPQGAATTCYLALHPDAKGVSGKYFAGCNEAKPTAIARDAELAKRLWAFSEELVENRPK	short-chain dehydrofenase TIC 32, chlorplastoc	Brachypodium distachyon	metabolism	N	chloroplast	14765.4	14664.7	15269.5	20688.4	16347	26588.8	25035.9	19482.3	22618.1	23431.3	32028.9	25443	23962.6	17600.9	24758.8	22335.3	22927.8	33059.3	28584.5	26726.7	17893.6	20298.5	18277.6	15142	17902.9
Bradi4g24367.1	7.0527e-06	3.25825e-05	0.00166869	0.129949	3.70658e-07	0.000957865	2.2718	1.33093	1.66638	1.33093	2.2718	1.7107	MASATILKSSFLPKKSEWGATRQAATPKQMTVSMVVRASAYADELVKTANTIASPGRGILAMDESNATCGKRLDSIGLENTEANRQAYRTLLVTPPGLGNYISGAILFEETLYQSTVDGKKIVDILVEQGIVPGIKVDKGLVPLVGSNDESWCQGLDGLASREAAYYQQGARFAKWRTVVSIPNGPSELAVKEAAWGLARYAAISQDNGLVPIVEPEILLDGEHGIDRTFEVAQKVWAETFYYMAQNNVLFEGILLKPSMVTPGAECKERATPEQVASYTLKLLQRRIPPSVPGIMFLSGGQSEVEATLNLNAMNQSPNPWHVSFSYARALQNTCLKTWGGRPENVAAAQEALLLRAKANSLAQLGKYTSDGEAAAAKEGMFVKNYSY	fructose-bisphosphate aldolase, chloroplastic-like	Brachypodium distachyon	energy	N	chloroplast	1.46868e+06	1.26518e+06	1.5325e+06	2.30255e+06	1.64223e+06	2.98152e+06	2.94861e+06	2.86189e+06	2.15427e+06	2.73657e+06	2.35912e+06	2.32772e+06	2.00663e+06	2.04932e+06	2.1857e+06	3.61377e+06	4.22522e+06	3.43857e+06	3.64569e+06	3.73081e+06	2.93724e+06	3.14724e+06	2.422e+06	2.73095e+06	2.80936e+06
Bradi4g28270.1	7.40322e-07	6.1277e-06	0.38239	3.71366e-05	0.000155646	3.75767e-05	2.53197	0.625698	0.625698	2.53197	2.39456	2.50505	MDDAGEIHAFGRSLRRESSVWSRGGDDAFSRSLSSRDEDDEEALRWAALEKLPTYDRARTAVLAMPEGDLREVNVHKRLDPQEKHALLERLAWVGDDHQRFLNKFKDRVDRVGIELPTIEVRYENLNVEAEAYVGSRGLPTIPNTYANVLEGLANALHLTPNRKQKISILHNVSGIIKPHRMTLLLGPPGAGKTSLLLALAGTMPSSLKMSGEITYNGHTMDEFVPRRSAAYVSQHDLHMGELTVRETVNFSAKCQGIGHRFDLLMELSRREKEENIKPDPEIDIYLKAAATGEQKAEVVTNHILKILGLDICADTIVGNNMLRGISGGQKKRVTTAEMLVTPGRALFMDEISTGLDSSTTFQIVNSIRQTIHIVGGTAVIALLQPAPETYELFDDIIL…	pleiotropic drug resistance protein 4-like	Brachypodium distachyon	transporter	Y	PM	143753	64491.1	68930.8	53543.4	82679.5	46447.4	51672.7	37896.8	70912.7	51732.4	205508	162131	230663	239064	209342	224753	182266	193325	191580	197981	180273	228003	229624	190565	207116
Bradi4g30730.1	5.56418e-13	7.50608e-10	0.974971	0.511164	0	3.33067e-16	2.43048	1.0323	1.0323	1.09529	2.43048	2.36947	MASRFWGQGDSDSEEEVEEIESEQGSDSEKSEAGDGGRDGSKNRYLNRYTQDSDESDTDNPRVIRSLKDKRNDEMKATADQMRNAMKINDWLSLQESFDKLNKQLEKVVRINESTKIPNRYITTLVLLEDFLAEALANKEAKKKMSSSNARALNAVKQKLKKNNKQYEDLIQNCRENPDSFEDDIADEKDVDEDEDDSGEDIVDPDKMAMSESEESGNEDDGSDEGGAWEKKLSKKDKIMDKQFLKDPSEITWDIVDKKLREIVASRGKKGTGRIERVEQLTFLTRVAKTPAQKLEILFHVISAQFDVNPSLLGHMPINVWKKCVNNMLLVLDILQKYPNIVVDTSGEPDEKETQKGADYDGTIHVTGDLVAFLERIDSEFFKSLQCSDPYTKDYVQRL…	Eukaryotic translation initiation factor 3 subunit C, eIF3c	Brachypodium distachyon	protein synthesis	N	cytoplasm	89972.5	81673.8	76754.2	85269.8	83417.6	82286.3	88931	91624.4	81607	86112.2	88809.3	86224.3	94137.7	96293.3	91366.1	197672	184133	205254	223921	202745	199497	199386	192140	199599	197655
Bradi4g30850.1	0.00020092	0.000520316	1	0.999902	0.00027368	0.0834357	3531.11	0	0	68.5647	3531.11	1604.1	MGAVSTLLQAEMRAVLSALLRVLRRHDFLRLVLVLLVFGSSGVTAQGGARRQRQVVDVGVILDMKTWLGNTSWACMEMALEDFYANATQARYRTRLKLHLRDTGPDAVDAASAGVDLLKNVHVQAIVGPQTSTQAKFLAELGNKSSVPIISFSADCPSRSGQTPYFIRTAWNDSSQAEAIASLVKKYNWREVVPVFEDDDSNTRFIPDLVDALRQVDARVSYRCKIHPSAKEDDIRRAISGLKYNWTSVFVVRMSHLLAFKFFQLAKDEGMMGQDFVWITAYGLTDIFDVVGSPALDVMQGVLGVKPHVQDTVELQNFTRRWRKKHRLENPGTSLSEPTVSGLYAYDTIWALALAAEETRYNDSNFVSVTNNGSTDFERIGTSKAAEKLRGTLLKTNFQ…	Glutamate receptor	Brachypodium distachyon	signal transduction	Y	PM	0	0	0	0	0	0	0	0	0	0	0	0	274.259	0	68.5647	1033.94	3270.79	4722.06	5097.63	3531.11	1018.65	1832.74	749.288	2815.72	1604.1
Bradi4g31300.1	1.15975e-10	1.07617e-08	0.942422	0.734451	0.000163448	1.6972e-12	10.0454	0.439016	0.671857	0.439016	4.53844	10.0454	MARSGVEVIASRGCSKLLLPGMQPSSASAASSFASASRASAAAQRQPEGAFAGLVICVTGLSKEARIQVKEAAERLGGEYSGSLHPKCTHLVFEHALKHGPRNGLFVVTLGWFVDCVRRNMRLDESLYSIKNMGENGLPLGEFNRLVGVPVSEQSCLPPMIFQDKACSGATQKHQLQGPREKPEHDLFVFANDTIYIDPGISGEMKKKISDAATREGAKLLDHWFIGCHATYVVCEDASVKRYVGHSDNIVTPLWILKTVKEKNLQRLVHLSSDLARQVAVVLENFQTSQENRKLGSVPSLDSKGTGLPPTGMEVNEIHQERQNFVEVAKKDIRERRVRRMQSCEVPIHPLTPVTLLDSICWTISESASSACIYTDSSWSDDANEQQSTTYFDANGDGK…	BRCT daomin-containing DNA repair protein	Brachypodium distachyon	DNA repair	N	nucleus	9074.03	12553.6	8720.09	7223.12	9392.7	8374.06	4646.55	5466.17	6755.43	6310.55	4585.87	1834.45	5412.03	4661.86	4123.55	45865.6	34954	40527.7	49165.4	42628.2	75744.6	90010.2	113112	98547.4	94353.7
Bradi4g32680.1	0.00106666	0.00222744	0.428189	0.00937143	0.0214887	0.000517808	3.44442	1.6762	1.6762	2.66372	2.47257	3.44442	MASSSVALVALLVASCAGMAAAASFTVGDAQGWVAGIDYSGWTSGKSFAVGDTLVFTYASKVHTVTEVSKSGYAACSGSSALGNDDSGSTTVTLSTPGTHYYICNIPGHCASGMKLAVNVGGGGGGSSSGSGAGIPSGAAAVRVPAMSAAIVLAAASGVLIKAALF	blue copper protein-like	Brachypodium distachyon	energy	Y	PM	4539.11	3403.56	2956.66	3717.97	3654.32	10555	7674.94	3585.35	2686.23	6125.37	10865	11311.1	9426.95	7333.29	9734.09	7608.18	9752.74	8481.73	10299.7	9035.59	15904.1	14806.4	10006.6	9630.98	12587
Bradi4g34070.1	0.0225448	0.0316801	0.0514708	0.253113	0.0066335	0.375117	1.64033	1.2633	1.46158	1.3081	1.64033	1.2633	MLAVRCGGGVGAGTQLTAQRTTAARSGHDRGIVLSAGTGVRELTLRVSFSRCSHPHRIGASFPWPVRCSPVPSPDTEERCVSNKRKNEAWEALKAEIADMFRPLLRNLAEICSLRRAYDLEDYQIGMLFGAFLGCVGCYQLWKTAPSVFVDTTLAFVFYKLSVVSSELHRRRESNSLITRLKFGTILIMVMKDIKKNYVRLDVIRMPVLFLYICAFLFDVAGVKKYGRRSLISLVNLLKTRGGIQEIYRIMRYPGYISPYDDSADWLRDSS	uncharacterized protein LOC100833007	Brachypodium distachyon	unclassified	Y	unknown	61280.6	53716.3	79068.9	73240.5	66826.6	120903	113121	82616.3	74048.5	97672.3	95248.6	88444.3	75992.2	89979.4	87416.1	136955	120109	91530	89876.5	109618	82304	75516	87860	92007.4	84421.8
Bradi4g36137.1	4.85304e-05	0.000158341	0.0327017	1.01758e-05	0.00673702	0.000790201	3.32239	1.93318	1.93318	3.32239	2.18614	2.57009	MGCLGWFKRRKPRSRRRGSSGPATTTTSAVSTSRSDDSGAVRPVSKSTTTTTGSSTVSQRSITELYEERGHGQLRAFEFEELRAATNDFSRAQKLGEGGFGSVYKGYVRPLDAKGDRIAVAVKRLNLRGLQGHKQWLAEVQFLGVLEHPNLVKLLGYCATDGERGAQRLLVYEYMPNKSLEDHLFSRIYSPLSWNRRLQIILGAAEGLAYLHEGLELQVIYRDFKASNVLLDKDFQAKLSDFGLAREGPTEGNTHVSTAVVGTHGYAAPDYIETGHLTAKSDVWSFGVVLYEILTGRRSLDRNRPQGEQKLLEWVGQFGPDSRNFRMIMDPKLRGEYSSKAAREIAKLAQSCLVKNAKERPAMSEVIEVLRRAVQVELAAPSPGPGDKPNSAGKGKRVD…	probable serine/threonine-protein kinase PBL19	Brachypodium distachyon	signal transduction	Y	PM	3258.5	3010.24	4211.24	3601.32	3520.33	8484.52	8663.9	6520.23	3553	6805.41	12350.5	11801.3	10289.5	12342.3	11695.9	6840.1	7931.93	9060.96	6950.73	7695.93	11271.5	6970.87	7526.43	10421.4	9047.54
Bradi4g36240.1	0.000656635	0.00145691	0.410922	0.566244	0.00146989	0.000881168	1.8592	1.21894	1.2643	1.21894	1.79164	1.8592	MKFSFPMAFTATVLAWSVLEYGDQMNAAKQLDPALDALRWITDFLIAAHPSDNVFYIQVGDPDLDHNCWERPETMTEKRPLTQINPKSPGSDIAAEAAAAMAAASMVFKTSDTTYSDSLLQHAQKLFTFADTYRGISSETYPKLQKYYNSTGYVDELLWAASWLYHATGDQTYLSYVTVENGKAYADWGRPTWFSWDDKLPGTQVLLSRVNFFGSKKISNAENGGLKMYRDTAEAVICGLLPDSPSATGSRTSGGLVWISGWNSIQHGTNSGFLASVYSDYMLTSQTAAVQCSGKYFSPTDIRNFAISQANYILGDNPMKLSYLVGYGSSYPQQVHHRGASIPADAKTGCKGFEYLHSSSPNPNVAMGALVGGPFQNDSFVDSRDNAVQTESSTYNSGT…	endoglucanase 24-like	Brachypodium distachyon	cell structure	N	apoplast	394084	376228	584523	646059	500223	679790	708444	596020	545468	632431	626722	645795	586909	579541	609742	867829	992181	909319	815550	896220	1.21817e+06	939590	681428	880883	930017
Bradi4g36310.1	1.82266e-08	3.7254e-07	0.991499	0.794063	0.00205852	1.11364e-09	3.97777	1.08333	1.08333	1.22093	2.08593	3.97777	MAAPSSLASSHLSRLADLRRAAVNAAPQQHQLRLGCSRRRAQRLVAMAGSGKFFVGGNWKCNGTKESISKLISDLNAATLENDVDVVVAPPFIYIDQVKNSLTDRIEVSAQNTWIGKGGAFTGEISAEQLVDIGCQWVILGHSERRHVIGEDDQFIGKKAAYALSQNLKVMACIGELLEEREAGKTFDVCFKQMKAFADNITNWTDVVIAYEPVWAIGTGKVASPEQAQEVHAAVRDWLKTNVSADVASSVRIIYGGSVNAANCAELAKKEDIDGFLVGGASLKGPDFATICNSVTSKKVAA	triosephosphate isomerase, chloroplastic-like	Brachypodium distachyon	energy	N	chloroplast	12947.9	10992.4	13254.7	14771.5	12991.6	13456.4	17718.9	11449.3	13672.4	14074.2	15022.1	16339.2	18032.4	14053.7	15861.8	18798.7	37358.7	31246.7	20994.2	27099.6	47742.9	54564.6	48214.2	56189.2	51677.7
Bradi4g36370.1	0.000558135	0.00126969	0.068851	0.00385929	0.000156206	0.00483276	1.82241	1.36302	1.36302	1.57457	1.82241	1.55301	MASSNSKNDSGNNNKNPLDAMGAFFSAQVNRRKLVTTEKQALATRATSSGDEFPGSGHRPADRKTWMSELGPDRVRVHQVVWPGSHDSATNKIGIPFITRPFAQCQSLSVYEQLATGCRLIDVRVQEERRVCHGVLATYSVDVVLADVKRFLAETESEVLVLEIRTEFGHEDPPDFAKYLVEQLGEHLIPQDEAVFHRTLAELLPRRVICVWKPRKSPAPKPGEPLWSAGYLRDNWIDTDLPETKFESNIKFLGQQPRVQDRRYFYRVENTVTPQADNPVLCVKPVTRRIHGYARLFIAEVFAKGLGDKLQVFSTDFIDGDFVDACAGVTKARVDGTA	1-phosphatidylinositol phosphodiesterase	Brachypodium distachyon	signal transduction	N	chloroplast, plastid	669620	831593	1.05321e+06	999719	888536	1.50517e+06	1.46301e+06	866348	1.00984e+06	1.21109e+06	1.25222e+06	1.48018e+06	1.3457e+06	1.51815e+06	1.39906e+06	1.53849e+06	1.73009e+06	1.58398e+06	1.62457e+06	1.61928e+06	1.38656e+06	1.31251e+06	1.46535e+06	1.35519e+06	1.3799e+06
Bradi4g36800.1	9.13117e-05	0.000268365	0.969093	0.000284838	0.000590427	0.00607348	1.79824	1.06889	1.06889	1.79824	1.72207	1.55337	MASPADGESPAKPILLHGDLDLWIIEARLLPNMDMFSEHIRRCFATCGTASSCAPKQPPRTRGGEGPNRRHHRKIITSDPYVTLSVAGAVVARTAVIPNSEEPRWGEQFFVPLAHRAAMLEFQVKDNDTFGAQLIGTASIPADRVTSACEEEVDEWFPIVGPSGRPYKPRTALHLRFRFRPLDTNPMYKHGIPGDPEKQGVQDSYFPLRHGGRVTLYQDAHVNEGDLPGIELERGKQFEHNNCWEDICHAILEAHHMIYIVGWSVYDKVKLVREPSPSRPLPEGGDLTLGDLLKFKSQEGVRVCLLVWDDKTSHDKLFIKTGGVMGTHDEETRKFFKHSSVICVLSPRYASSKLSIFKQQVVGTLFTHHQKCVLVDTQASGNKRKVTAFVGGLDLCDGR…	Phospholipase D	Brachypodium distachyon	metabolism	Y	PM, vacuole	225985	164784	237567	152829	195291	242347	266158	136052	190423	208745	320723	370497	350116	363387	351181	354086	375591	314293	301249	336305	353235	285431	302044	272729	303360
Bradi4g37500.1	4.44304e-05	0.000147615	0.12904	0.0263906	9.99735e-06	0.000552162	3.79351	1.86538	1.86538	2.19648	3.79351	2.94293	MLAPAAVVASRHVLELLRQCRSIQHLDQIHAHLVVHGFSDVSSVASQLIASYCTLSAGDRDGGLCHARRLFDRIPEPDRFMYNTLVRAYSNSDCPQEALRLHRGVLQRGILPNEFTLPFVLKACTTVRAVEHALAAHGVVVKLGFVQQIFVANALLHFHASAGSLRDSRRFFGEMADRNVVSWNTMIGGYAQAGEVSEACALFGEMRHQGLLADVFTLVSLLFACSSEGNLEVGRLVHCHMLVSGSRVDRILGNALLDMYGKCGDLWMAHRCFDMMPIKNVVTWTSMLCAQAKHGSVDAVRDWFEQMPERNIVSWNAMISCYVQCGRLHETLDLYNRMRSLGITPDEFTLAGVLSACGQNGDLASGKMIHCYVRDNFNDPGVTLLNSLLDMYARCGQVD…	pentatricopeptide repeat-containing protein At2g22410, mitochondrial-like	Brachypodium distachyon	unclassified	N	mitochondria	4042.18	2283.47	7635.25	7496.26	5364.29	6297.65	12508.2	8741.68	12478.3	10006.4	11393.3	16680.2	8524.63	10532.2	11782.6	18052.9	23942.9	18843.2	20559.1	20349.5	13653	19444.4	16986.8	13062.9	15786.8
Bradi4g38170.1	1.04246e-10	1.07617e-08	1	0.999573	0.000430337	5.55112e-16	52.9409	1.05363	1.05363	1.47684	16.9791	52.9409	MEDPTVLPIVGIGGVGKTTLAQLVYNDSRVTTHFDVRIWVCVSDLFDKRRITKEIIQVLNQKRKETILSITTEEFYSPPSLDNLQMKLMEELMDQKFLLVLDDVWPNANQEWRGFSAPLRYGRKGSMILVTTRSLKVAEYVTTIEPVKLEGLPTDIFLEFFKKCAFGRESPESYPQLQDIGRSIVSSLCGSPLAAKTLGRLLNDNLTEQHWRGIQNNELWELSYERNDILPALQLSYLYLPQELKRCFRLCSIYPKDYSFRRDEIVDIWVSQGFVAQEGSICLEDTGNRYLDDLRSRFLFQDDPKFPGLGRYVMHDLICEMAQPVSVGECFLMQNFSYQNQRTTSHTVRHMSIESDSEAQSRLTNVTTLHHLNKLHSLRLGTRFVIEISWFSQLSNILF…	putative disease resistance protein RGA2-like isoform X1	Brachypodium distachyon	disease/defence	unknown	unknown	872.626	618.028	3017.96	365.514	1218.53	1595.13	1612.48	1092.43	835.514	1283.89	1831.25	1378.5	548.156	3440.42	1799.58	20109.4	18994.4	19744.1	23910.5	20689.6	49847	65965.3	78504.1	63724.3	64510.2
Bradi4g39920.1	3.2996e-06	1.89547e-05	0.054866	0.710955	0.000396758	0.00919535	1.62794	0.559596	1.32857	0.876331	1.62794	0.559596	MANFQITPRSALVEGKELNFSNLFLFHTPIGSSPNQSAITEANATTGLGRTVVHNWLIYDGPGSNATLVARAQGLHTYAGNWQNSFSIVFEVERFKGSTLQVMGISVEEGEWAIVGGTGQFAMANGVIYKRFHEQRSDGNTIELTAHGFCPMLKGAPSLLTKLGPWGGNGGTEEDTTEAAPKGLESITVFSGDVVDSIGFSYVDQAGKKHTAGPWGGPGGSPRQIQLAPSEYVKEVSGTFGDYYGVNVITSLTFVTSLKTHGPFGQEDGTPFTVPVQKNSGIVGFHARGGKFLDAIGVYVRPL	Dirigent protein	Brachypodium distachyon	secondary metabolism	Y	apoplast	238819	403004	415511	386775	361027	544879	526586	506201	340940	479652	289780	343462	295966	336310	316379	551731	659117	536033	604045	587731	217762	186416	197742	206197	202029
Bradi4g40990.1	0.00182479	0.00357797	0.257931	0.957303	0.0154523	0.843358	1.96588	0.478244	0.478244	0.849173	1.96588	1.22965	MEERRRYCSCSSHGLSPPLPLFFFSFLCLHLSMAAPAGGTPPLPLNSTQESVMRDLLSLVGRRAGWNTTVSNPCLWSGIACSPSNSGSFSVVTNITLSAHGVSNSSIFATICAIDTLLSLDLSRNSFTDFGDRLFSPSCSMKEGLRSLNLSSNQAASSLGGFSGFPRLEVFDLSFNLVRGNLSTELGSFPQLRSLNLSTNNLSGGVPTSMVPSLEELVLSGNQLRGPIPPGLFSYGELVMLDLSQNNLTGDVPDELWKLDKLQTLLISGNELSGAIPGRLSNSTMLSRYAANKNRFTGPIPNGITEHVKMLDLSYNTLSGNIPSDLLASPVLQAIDLTSNRLEGSIPRNFSARLFRLRLGMNLLTGRIPDSIGNASKLAYLELDNNNLSGDIPPQLGRC…	LRR receptor-like tyrosine-protein kinase PXC3	Brachypodium distachyon	signal transduction	Y	PM	7514.29	4338.64	1237.57	2441.17	3882.92	1004.82	2586.16	498.755	3338.19	1856.98	3006.27	1666.88	4103.69	4412.23	3297.27	8532.71	7398.06	8037.17	6565.47	7633.35	5537.55	5627.76	4641.75	3291.47	4774.63
Bradi4g41000.1	3.54483e-06	1.9874e-05	0.00484379	1.84315e-05	1.39838e-06	1.86045e-05	4.48392	2.65293	2.65293	3.90047	4.48392	4.0542	MAGLLHLNSTLLPSASLLLRNRSGGQAVRRRRACRVEAKIREIFMPALSSTMTEGKIVAWNAAEGDRLAKGDPVVVVESDKADMDVETFYDGFLAAVLVPAGESAPVGSAIALLAESEDEIPLAQSQAASFSSSSSSSSSSSPPAPQETAAQEASPPPPPPAPVAVSAPAPPSPAAQGGARVVASPYAKKLAKELSVDLFSITGSGPAGRVVAKDVEAAAAAPAKKAVPVAAARPDVPLGSTVPFTTMQGAVSKNMLESLAVPTFRVGYTITTGALDDLYKKIKGKGVTMTALLAKATAMALVQHPVVNSSCRDGQSFTYNSSINIAVAVAIDGGLITPVLQDADKLDIYTLSRKWKELVDKARAKQLQPQEYNSGTFTLSNLGMFGVDRFDAILPPGT…	Dihydrolipoyllysine-residue acetyltransferase component of pyruvate dehydrogenase complex, mitochondrial-like	Brachypodium distachyon	energy	N	mitochondria	15199.1	22898.8	19728.4	13704	17882.6	28867.3	53936.8	54960.5	52000.5	47441.2	66902.4	80374	77104	54621.6	69750.5	68021.5	86034.9	85964.7	80715.3	80184.1	88525.1	78263.3	66729.9	56480	72499.5
Bradi4g41527.1	0.0062135	0.0103482	0.0361062	0.0762076	0.00114742	0.119713	5.49218	3.18501	3.80388	3.42764	5.49218	3.18501	MSSAAAAAPPPRRTRSRLQPSLSRKSDDPSTIAANGNGKTSPKLASPKHLPRERTVKKLRLSKALTIPEGTTVYDASRRMATRRVDAVLLTDAQGLLSGIVTDKDISTRVIAEGLRVEQTIMSKIMTRNPTYVTSDSLAIEALQKMVQGKFRHLPVVENGEVMAMLDIAKCLYDAIARLEKAAEQGSAIAAAVEGVERQLGGNFTAPYAFIETLRERMFKPSLSTIVTEGTKVAIVSPSDPVYVATQQMREFRVNSVVVTTGNTVQGIFTSKDVLMRVVSQNLSPELTLVEKVMTANPDCATLDTTILDALHIMHDGKFLHIPVLDREGQIAACLDVLQLTHAAIQLVEGGNGAANDVANSVMQRFWDSALALEPPDDEFDSRSEASLLMASEAGDGKS…	CBS domain-containing protein CBSCBSPB3-like	Brachypodium distachyon	unclassified	Y	PM	3600.65	1810.57	3250.25	3614.81	3069.07	12150.2	20993.2	6777.84	6776.24	11674.4	11475.8	13247.4	8922.73	8432.85	10519.7	8997.91	17081.7	18605.1	22738.9	16855.9	9818.5	6806.57	10868	11607	9775.02
Bradi4g41750.1	9.76379e-10	4.11605e-08	0.99996	0.999907	0.00123351	2.47358e-13	8.45572	1.0441	1.0441	1.05436	3.39823	8.45572	MDSRSQAPQKSSSFSSAQKAAPREVDRNLSLGSLRHPHGGAGAGGDLRGGGYHPSASTEQIREEDEEAEEEEEDRNSPGVSALSGEVDAFVSGDLSVPESSLERFAAAVELQISRSEAKVRGGGGGGAGDRLGVVDAANGEPPALLAAIARLAALSSALAKVADPGKYGGAAQRVGGVMQRAMAVLDDEFHALLDLPKKDTCKLMRRPPSFEQQQQQQATHEADRCVLRAPPPSAAAADSCAAEPAPPYPPETVDRLRCIADAMASAGRATECAQMFLAARRSAFDGSLRHLGYEKPGSAEDVARMTWEALESEIATWIKAFRHAINVGLSTEHDLCLRVFSSGVGRAVFADLARCVMLQMLGFTDAVAATKRSAERLFKVLDMYEAVRDASPVVDAFF…	Exocyst subunit Exo70 family protein	Brachypodium distachyon	intracellular traffic	Y	PM (exocyst)	2100.01	2315.57	1698.16	1208.83	1830.64	2191.38	1637.55	2068.17	1748.41	1911.38	2414.56	1345.47	2063.89	1896.73	1930.16	6707.1	5109.75	6134.93	6932.01	6220.95	12390.3	13814.1	18441.4	17271.7	15479.4
Bradi4g44100.1	0.000226245	0.000575608	0.81823	0.483295	0.000258994	0.00132466	4.19753	1.50683	1.50683	1.82365	4.19753	3.74007	MPRETKRVAVDTRGLSREQRAKEISIKRGRCPSPLTCRRRRADRHMEWVLASTVKRKDLLFACSGIALPEGPEGRHIQRFVTSGTLVKVFDDKRNTDDNIRILIDVRPVDLDRQPNQDDMPDIISMFAFGRAFHSGNLMVKDLPLLEPVPIVDDVQPRVLYLEAPAEAALGGPLVDSNVLYYSTSSMNGEEDTNDAGTSSGSGTRNGRHRYSLPSGVQKIVPSDEFGEVTAWRMLDYTVMVRIGGKECVWGDLPNKVHTNIARRSVTVVSFSGLLISWHERRRTRVGTRTRMHARSVILTSASLARACNDEDEVDGNLRIEVFLAPRQRANGTLELYHLDYNIAIISVDKQFVAARPEDIFNTVEKPSKVVVAIGREYEEGALFAALGKVTNKPRSKPS…	Peptidase, trypsin-like serine and cysteine proteases domain containing protein	Oryza sativa Japonica Group	unclassified	N	cytosol	48653.7	86663.1	78522.4	105553	79848	111327	129512	103075	137356	120317	112351	185286	144067	140757	145615	180757	489585	310148	360166	335164	201186	373929	330189	289245	298637
Bradi4g44250.1	3.85201e-08	5.97283e-07	0.00026643	5.17283e-05	1.99118e-12	4.51431e-08	2.07519	1.44564	1.44564	1.60154	2.07519	1.80433	MASSTNANSATLPTTHTASGTSSYHKPPPADLSYQKRRHRQRRICYGCLLATLILLAVLILVLFLTVLRIRDPTTRLVSTRLAGVAPRLNFPALSLQLNVTLLLSLSVHNPNAASFAFPGGGHADLTYRGAHVGDARIDPGSVPSRGDGDITMALTLQADRFVSGGGMARLVADVEAGSLPLEASTRIPGKVNVFGIFKRKAVAYSDCSFVFGVAELAVRSQECRDHTKL	Harpin-induced protein 1 containing protein	Oryza sativa Japonica Group	unclassified	Y	PM	176503	162247	171430	177390	171893	269021	263043	230613	231303	248495	238864	295125	276141	291041	275293	324604	346904	377374	377954	356709	287152	315100	333509	304840	310151
Bradi5g02890.1	0.0030129	0.00554488	0.80059	0.972319	0.00628484	0.675954	1.62969	0.822718	1.14465	1.07654	1.62969	0.822718	MASANAISTASLLRSFSSQGRVRRSRNGRAQRLVVRADAKDIAFDQKSRAALQAGVEKLANAVGVTLGPRGRNVVLDEYGSPKVVNDGVTIARAIELANPMENAGAALIREVASKTNDSAGDGTTTACVLAREIIKLGILSVTSGANPVSLKKGIDKTVQGLIAELENKARPVKGSGDIKAVASISAGNDELIGSMIADAIDKVGPDGVLSIESSSSFETTVDVEEGMEIDRGYISPQFVTNLEKSVVEFENARVLITDQKITSIKEIIPLLEQTTQLRCPLFIIAEDITGEALATLVVNKLRGIINVAAIKAPSFGERRKAVLQDIAIVTGAEFLAKDLGLLVENATVDQLGTARKITIHQTTTTLIADAASKDEIQARVAQLKKELSETDSIYDSEK…	ruBisCO large subunit-binding protein subunit alpha, chloroplastic-like	Brachypodium distachyon	protein destination and storage	N	chloroplast	83852	73334.7	105012	129822	98005.1	102717	127797	111251	106961	112181	112324	107643	86607.6	115451	105506	132813	149520	135757	220781	159718	75951.1	72437.5	87871.9	86261.9	80630.6
Bradi5g04560.1	3.71527e-11	7.15986e-09	1.11022e-16	1.67644e-14	0.0116327	0.000110375	6.05084	1.99661	5.61879	6.05084	1.99661	3.13186	MGIVDVLSELCYMPRTRRHIKKRKQFQTVEMKVRIDCEGCERKVKKALDDMKGVSSVEVTAKQNKVTVTGYVDAAKVMRRVAYKTGKRVEPWPYVPYEMVAHPYAPGAYDKKAPAGYVRNVIGDPSAAPLARASSTEARYTAAFSDENPNACSVM	heavy metal-associated isoprenylated plant protein 27	Brachypodium distachyon	disease/defence	Y	PM	15568.5	17828	20261.5	18141.2	17949.8	104313	87805.4	102708	108598	100856	94089.9	106607	116355	117394	108611	27896.1	42800.3	33837.9	38820.7	35838.7	59840.2	53635.3	60557.5	50832.4	56216.3
Bradi5g05668.1	2.72389e-10	1.93396e-08	0.866855	0.00477896	2.57128e-13	0.0514505	1.93075	0.730465	0.948647	0.730465	1.93075	1.18669	MRTNPTTSRPGVSPIEEKSTGRIDQIIGPVLDVTFPPGKLPYIYNALVVQSRDTADKQINVTCEVQQLLGNNRVRAVAISATDGLMRGMEVIDTGAPLSVPVGGATLGRIFNVLGEPVDNLGPVDSSATFPIHRSAPAFIELDTKLSIFETGIKVVDLLAPYRRGGKIGLFGGAGVGKTVLIMELINNIAKAHGGVSVFGGVGERTREGNDLYMEMRESGVINEKNIEESKVALVYGQMNEPPGARMRVGLTALTMAEYFRDVNKQDVLLFIDNIFRFVQAGSEVSALLGRMPSAVGYQPTLSTEMGSLQERIASTKKGSITSIQAVYVPADDLTDPAPATTFAHLDATTVLSRGLASKGIYPAVDPLDSTSTMLQPRIVGNEHYETAQRVKETLQRYK…	ATP synthase subunit beta	Brachypodium distachyon	energy	N	chloroplast	336274	397347	319152	321651	343606	318651	351847	324130	309216	325961	239238	238298	263699	262735	250992	631840	726888	639108	655840	663419	406016	447808	349191	428000	407754
Bradi5g07360.1	5.71482e-09	1.51163e-07	0.0133368	8.63531e-13	0.00430428	0.000157403	2.88658	1.44473	1.44473	2.88658	1.51681	1.72717	MAGAGSSKGMADAVEKWMAFPAGGEEETTGGFTLPMPPLSPPGGKEIVEEPGNQQQQQGWWPKPAAEQRGSVSGKPAEPRGSGVGSSKPSMEGRASYDSLPRVSQELKDALSNLQQTFVVSDATRPDCPIIYASAGFYTMTGYSAKEIIGRNCRFLQGAETDQKEVSKIRDAVKAGKSFCGRLLNYRKDGTPFWNLLTVTPIRDDQGKVIKFIGMQVEVSKYTEGLSDKCMRPNEMPVSLIRYDDRQRENAMSSMTEVVQTVKHRKADTPEMMMMETPKLSNADKDGGSRMAVAGSSPLVTPATPSGGGLKSPLWDLKKEESRMSRLMSGRKSLMGFKVGKRSSVGSREPAVVQEAPEVKMTVERTDSWERAEREKDIRQGIDLATTLERIEKNFVITD…	phototropin-2-like	Brachypodium distachyon	signal transduction	Y	PM	721766	480447	689262	605387	624216	864867	1.0608e+06	829148	852474	901823	1.76363e+06	1.58207e+06	1.92773e+06	1.93396e+06	1.80185e+06	1.03501e+06	948410	948116	855736	946817	1.06959e+06	1.22413e+06	1.02483e+06	993956	1.07813e+06
Bradi5g08886.1	5.16223e-06	2.58879e-05	0.052933	0.745298	6.94247e-06	0.917339	2.31463	0.825721	1.49228	0.825721	2.31463	1.11627	MATLRVDEIHKILRERIEQYNRKIGIENIGRVVQVGEGVVRIIGLGEIMSGELVEFAEGTRGIALNLESKKVGIVLMGNGLMIQEGSFVKATGRIAQIPVSEAYLGRVINALAKPIDGRGEIIASESHLIESPAPSIISRRSVYEPLQTGLIAIDSMIPIGRGQRELVIRDRQTGKTAVATDTILNQKGQDVICVYVAIGQRASSVAQVVTTFHEEGAMEYTIVVAEMADSPATLFVGYLHFSI	ATP synthase CF1 alpha subunit, partial (chloroplast)	Brachypodium distachyon	energy	N	chloroplast	69552.8	59519.5	104761	131408	91310.2	166234	136200	129754	112856	136261	93664.6	70393.9	91955.6	45572.8	75396.7	244060	195133	206761	199442	211349	112434	101163	83048.1	111062	101927
Bradi5g09650.1	0.00222359	0.00424875	0.0598645	0.0253965	0.000284784	0.0293643	1.88498	1.44458	1.44458	1.51867	1.88498	1.50615	MACAFSASTVSPAAALVASPKPTAAPQFLSFPRAFVGGAARPSRLAASRTARARNFVARAGGEDSLPLVGNKAPDFDAEAVFDQEFINVKLSDYIGKKYVILFFYPLDFTFVCPTEITAFSDRHEEFEKINTEILGVSVDSVFSHLAWVQTERKSGGLGDLKYPLVSDVTKSISKSFGVLIPDQGIALRGLFIIDKEGVIQHSTINNLGIGRSVDETLRTLQALQYVQENPDEVCPAGWKPGEKSMKPDPKGSKEYFAAI	2-Cys peroxiredoxin BAS1, chloroplastic-like	Brachypodium distachyon	disease/defence	N	chloroplast	91954.5	73321.1	121311	126140	103182	174087	171064	131830	119236	149054	154710	167379	140216	164491	156699	192288	242596	177261	165839	194496	130618	151415	169762	169834	155407
Bradi5g10570.1	1.47637e-07	1.74704e-06	0.000101636	1.67128e-07	2.66498e-08	1.11327e-08	2.9873	2.16939	2.16939	2.79822	2.9873	2.94259	MQLYHHPYSLDSQKVRIALEEKGIDYTSYHVNPLTGKNMNVAFFRMNPSAKLPVFQNGAHVIFRAIDIIQYIDRLAVHLSGEITPVNTEVHKWMQKVDSWNPKMFTLTHTPVKYRAFVSKFKRRVLIARMAEAPDLASMYHVKLREAYETEDRLKDPDIMKQSEEDLSKLLDDVEAQLNKTKYLAGDEFSTADAMFIPILARIILLDLHEEYISCRPRVLEYHTLVKQRPSYKVVIGKYFNGWKKYRTLFRTSFFLCVRTLFRKY	glutathione S-transferase F10-like	Brachypodium distachyon	disease/defence	N	chloroplast	35061.2	33785.9	43107.1	38780.2	37683.6	89345.5	100987	71778.9	64889.6	81750.3	100437	125849	105753	89748.3	105447	110149	111834	108580	119726	112572	111535	107312	112829	111875	110888
Bradi5g12120.1	5.61093e-05	0.000178518	0.0560626	0.00219333	3.49044e-06	0.000668278	2.16582	1.43698	1.43698	1.70647	2.16582	1.81164	MKLSCLLLVSFAAAALASEGAVEVAGGGGGGRLASDPEKKCVYTVYVRTGSIWKGGTDSKIGVTLLGSDGTGIRIGDLERWGGLMEDGHDYYERGNLDIFSGRGPCMARLPCWANVTSDGAGAHHGWYCNYVEVTVTGPHMGCAQQLFTVEQWLATDASPYRLYAVRDTCSSGDSGSVSVSAPVATGDEARGAAS	transcription factor GH7	Brachypodium distachyon	transcription	N	nucleus	41241	38625.5	41081.9	38307.5	39814	70972.3	60821.2	54971.9	42081.7	57211.8	66774.5	63128.8	67999	73863.7	67941.5	74237	101319	87464.3	81899.6	86229.9	83314.9	77147.4	71101	56951.7	72128.7
Bradi5g12330.1	0.0091561	0.0144882	0.0915538	0.119626	0.0018438	0.186202	1.63923	1.2869	1.34502	1.32361	1.63923	1.2869	MASPMLSTAMAPLQGSGLLEFSGLRSSSSLPLRRNATSEDFMSAVSFRTYAVGTSGSGSRRAPTEAKLKVAINGFGRIGRNFLRCWHGRGDSSPLDVIAINDTGGVKQASHLLKYDSTLGIFDADVKPVGDNAISVDGKVIKVVSDRNPSNLPWGEMGIDLVIEGTGVFVDRDGAGKHLEAGAKKVLITAPGKGDIPTYVVGVNAELYSHSDTIISNASCTTNCLAPFVKVLDQKFGIIKGTMTTTHSYTGDQRLLDASHRDLRRARAAALNIVPTSTGAAKAVALVLPNLKGKLNGIALRVPTPNVSVVDLVVQVSKKTLAEEVNAAFRDAAANELKGILDVCDEPLVSVDFRCSDVSSTIDASLSMVMGDDMVKVIAWYDNEWGYSQRVVDLADIVA…	Glyceraldehyde-3-phosphate dehydrogenase	Brachypodium distachyon	energy	N	chloroplast, apoplast	949370	930515	1.17315e+06	1.54701e+06	1.15001e+06	1.46304e+06	1.92855e+06	1.43461e+06	1.36097e+06	1.54679e+06	1.47746e+06	1.72133e+06	1.39298e+06	1.4969e+06	1.52217e+06	1.77512e+06	2.30972e+06	1.74875e+06	1.70692e+06	1.88513e+06	1.25475e+06	1.56516e+06	1.53061e+06	1.56931e+06	1.47995e+06
Bradi5g12660.2	1.97369e-08	3.85871e-07	0.999825	0.974919	4.01365e-08	2.01382e-05	112.547	2.31622	2.31622	5.82335	112.547	86.0913	MLPLSSSLLPSPLLLSLPIATSKLCHPHARLPPLHASASQAPELLAKSALRRISDKLRSLGYLETSSEASTPAPTQSSDAPSPGEIFVPTPNQLPRHRVGSTLDPSWATGDGEADTARRRRRGGRDAAVPSPPSAAELTLPRDELRRLQGVGIRLRKRLKVGKPGVTEGIVNGIHERWRNVELVKIRCDDVSAMNMRRTHEILERKTGGLVIWRSGSTIILYRGTNYKYPYFHDQKSNSEDGKDLGIASVQQSSSEEDAENHASHDSTLEEDEEDDSFGIVYGEQRTIAEEDKNHDVVSMEQSVIRKQDENHPTIFSKEPVVDTKEVNLVTRSTLKSNYGAANKHHARFLVRTNADPLSEVRAPARSTLVIGVGSPNKFRLQLPGEVKVADEGDKLLDG…	chloroplastic group IIA intron splicing facilitator CRS1, chloroplastic-like	Brachypodium distachyon	transcription	N	chloroplast	0	93.4886	0	0.16593	23.4136	120.174	0	96.7504	0	54.2312	137.458	44.8547	182.033	181.037	136.346	2885.76	1714.85	2572.79	3367.14	2635.14	1701.12	1675.57	2446.22	2239.93	2015.71
Bradi5g14490.1	0.00815983	0.0131986	0.301572	0.867164	0.01654	0.00709179	1.86708	1.17321	1.39356	1.17321	1.76502	1.86708	MGASSVLLLLCLLGFCFAVSHQKSDSCAGDLQVAHLVPFDSSAFRCITLWKQEDFILRYKNTAPNKWSFVLSAPDKGTFVAVGFSGKGLMIGSSAVVGWAAASSGGDGKGKGGVIKQYYLQGRTPEDVTPNEGRLAMVRNRSALVSHSGRLYLAFELNTDRPQPHLIYSVGYEGFIPSSDSKLQMHRDMGSRSFNYTSGLASNGDAVTDSFPAERWHGLLSMMGWGVLLPVGMMAARYFRRQEPYWFYGHMAIQGLGFAVGIVAVILGFRLNEDGLKNIYVHKAIGIAILSMTSLQVTAILARPDKTSKVRRFWNWYHHNIGRAAILLAIGNIFLGLSIAQELSSYIVSYGVFVAVWVMAIAAFEIKRWYDDDDD	cytochrome b561 and DOMON domain-containing protein	Brachypodium distachyon	energy	Y	PM	18590.8	12750	10700.9	12396.9	13609.6	20055.8	15788	22897.5	17122	18965.8	16410.3	13953.2	15426.4	18077.6	15966.9	18238.9	20888.1	28108	28850.4	24021.3	35690.9	22535.6	21638.4	21776.4	25410.3
Bradi5g15360.1	0.00010761	0.000307554	0.481839	0.803549	0.000159653	0.0753152	2.36882	0.788601	1.33399	0.788601	2.36882	1.61606	MSTCAADLAPLLGTAAMNATDYLCNRFADTTSAVDSTYLLFSAYLVFAMQLGFAMLCAGSVRAKNTMNIMLTNVLDAAAGALFYYLFGFAFAFGTPSNGFIGKQFFGLQHMPQTGFDYSFFLFQWAFAIAAAGITSGSIAERTQFVAYLIYSAFLTGFVYPVVSHWIWSADGWASPVRTSGPLLFNSGVIDFAGSGVVHMVGGIAGFWGAFIEGPRIGRFDHAGRSVALKGHSASLVVLGTFLLWFGWYGFNPGSFVTILKSYGPPGSINGQWSGVGRTAVTTTLAGSVAALTTLFGKRLQTGHWNVVDVCNGLLGGFAAITAGCSVVDPWAAVICGFVSAWVLIGLNALAARLKYDDPLEAAQLHGGCGAWGVIFTALFAKQKYVEQIYGAGRPYGLF…	Ammonium transporter	Brachypodium distachyon	transporter	Y	PM	620712	349452	396276	513410	469962	583003	527475	798567	598654	626925	503414	304790	357811	316437	370613	884041	1.52618e+06	1.08808e+06	954729	1.11326e+06	745552	918647	649212	724541	759488
Bradi5g15637.1	6.27214e-10	3.38445e-08	1	0.384024	6.21725e-15	2.57034e-06	13.3652	0.990525	0.990525	2.31679	13.3652	8.03217	MFRVLQRVNHDGHLDEALWNAGYVLLKFYNLYEGKSRSEFESELYERFGFLVKMPLLKPDRGPLPGDVKSILDEGLSLFTHGRAELSQGSYVREWAQWEKRLREILFGNADYLKSIQVPFEVAVKEVVDQLKAVAKGDTITPATAKQSFDNISFAAVTLSQADILGLVRKVAEKDTDVSNFLNGIKLEDNLMKVHVTLAHKRAHGVAAVASYSLYRNKKLPVSFNAFFYNDKMAALGAQLGMVNGEAIVSNNDFPHCTLWTVGGVAPKEANTLPQLVSQGKAKRVLIDSPITISGIVNFY	RNA ligase isoform 1	Triticum aestivum	unclassified	N	cytosol	1774.4	1141.99	1383.17	395.517	1173.77	1655.13	1068.11	1381.01	546.334	1162.65	1988.54	2583.07	3633.62	2672.24	2719.37	13487.2	14652.5	15991	18619.7	15687.6	9174.36	6904.61	11962.6	9670.03	9427.9
Bradi5g15930.1	2.37123e-05	8.6688e-05	1	1	0.000160522	0.00161346	5007.65	0	0	3.03247	5007.65	3869.24	MPRGRGSPVSNPKETNVEETTNSNKDNTRHSRSVYLLLGLLIVFLHGSWSVYRTQFGNLPLPLDAEQAGKRGFSEASALKHVEYLTGLGPHPVGSDSLDLAVQYVYAEAEKIKKTAHWDVDVQLELFHTDIGANRLSGGLFNGKTLLYADLKHVILRIVPKYLPEAEENLILVSSHIDTVSTTEGAGDCSSCVGVMLELARGVAQWAHGFKSGVLFLFNTGEEEGLDGAHSFITQHHWRNSVRFAVDLEAMGISGKSTLFQGTHQWALESFAAVAKYPSAQIATQDVFRSGAIKSATDFQIYQEVAGLPGLDFAYTDRTSVYHTKNDKMKLLKPGSLQHIGENMLAFLLHAAASPKFMKDAHQAKQESTEQKKAIFFDILGKYMIVYPQRLAIMFHNSI…	endoplasmic reticulum metallopeptidase 1-like	Brachypodium distachyon	unclassified	Y	ER, PM	0	0	0	0	0	0	0	0	0	0	0	0	0	12.1299	3.03247	3938.3	3248.09	5686.96	7157.26	5007.65	956.537	3836.16	5517.18	5167.09	3869.24
Bradi5g16320.1	7.66391e-10	3.77689e-08	1.03793e-05	3.33067e-16	1.9509e-05	2.33683e-10	3.57556	2.02965	2.02965	3.57556	2.10211	2.80985	MGCGSSRQVDGDGPRRKPGSVGDVVVFLPGLRAPRSVDFSQALAGRLDKSAVERLSALRARVVELAMQESAAALKPKRKTAARHGSTTANLLQALEDYLPVLLGLVKEGSELRHIVQFVWANQEDNAEETAMEDAWYEVLSVLQLMAMVCLLQANSLLLPRAYGDGYGPRVSEESRRATVDVFLKAAGYLDCAIRQVLPHMPSELRRQLPVDLAEGNLKALSLQALGQGVDMQLGLAIDSPKATLAVKRRLACEMVKYWHQVQESIPELPVSDGWGKKHLLFVKWKYVEAKAAAYYFHGLILDEGNSEKFHGMAIAALQASEEFLKESKRASEAFHATPPASRSPTPFGTAKYMFDKIPKDASSKVRINQDLYTQERVIGAPPPLPDFSLALTPEDYDL…	BRO1 domain containing protein	Oryza sativa Japonica Group	signal transduction, disease/defence	Y	PM, cytosol	78275.8	82123.2	97534.9	104234	90542.1	219544	199921	157308	158302	183769	303942	346734	308448	335831	323739	176617	197657	190710	196334	190329	242031	239971	277576	258059	254409
Bradi5g16400.1	0.00148548	0.00300332	0.0557035	1	0.00115639	0.0994259	1.57207	0.999236	1.33369	0.999236	1.57207	1.29473	MRGGGEAENTPRRTAAGQAMVELQANAATATSASGAMVVGLSPLSETLWRDSKSLPGAGAALIGEVSARLTWKDLSVTVALGPGKTQTVLDELTGFAEPGSLTALMGPSGSGKSTLLDALAGRLAANAFLSGNVLLNGRKAKLSFGAAAYVTQDDNLIGTLTVRETIGYSALLRLPDKMPREDKRALVEGTIVEMGLQDCADTVIGNWHLRGVSGGEKRRVSIALELLMRPRLLFLDEPTSGLDSSSAFFVTQTLRGLARDGRTVIASIHQPSSEVFELFDMLFLLSGGKTVYFGQASQACEFFAQVGFPCPPLRNPSDHFLRCVNSDFDKVKATLKGSMKARIERSDDPLDKITTSEAIRKLVSSYNRSQYYYAAREKVNDIARIKGTVLDSSGSQAS…	ABC transporter G family member 11-like	Brachypodium distachyon	transporter	Y	PM	461200	413985	422995	445058	435810	504768	562420	661022	596738	581237	442868	409330	448301	441407	435477	570290	567309	794077	808811	685122	650475	612315	518708	475528	564256
Bradi5g17230.1	1.23978e-05	5.1403e-05	0.00967365	0.80484	2.19044e-05	0.858736	7.15313	0.189403	4.35316	0.189403	7.15313	1.71979	MDQRALGQPAHEIEKTAPEPGPDMESEPALARAAAERAVPPWREQVTARGMVAALLIGVVYTVIVMKLSLTTGLVPTLNVSAALLAFLALRGWTHALARLGIASRPFTPQENTVVQTCAVACYTIGFGGGFGSFLLGLDKKTYEQSGVKTPGNVPGSYKEPGIGWMMGFLLSISFVGLLTLLPLRKVLVIDYKLTYPSGTATAVLINGFHTPQGDKNAKKQVRGFLKYFGISFFWSFFQWFYTGGDACGFLQFPTFGLQALKQTFSFDFSLTYVGAGMICSHLVNLSLLFGAILSWGVMWPLMSKQKGNWYPANASGSSMTGLYGYKAFLCIALLTGDGFYNFFKVIIITLKSMHERSKRGRLNRVADADSVSIDDRQRDEVFNRDNIPAWVAYSGYAV…	metal-nicotianamine transporter YSL16-like	Brachypodium distachyon	transporter	Y	PM	7587.23	2427.86	1639.28	3301.16	3738.88	20677.9	8240.01	23347.1	12838.7	16275.9	1594.2	53.0182	694.703	490.703	708.156	31559.8	19208.3	35604.1	20606.6	26744.7	8735.96	6429.74	4449.01	6105.6	6430.08
Bradi5g19680.1	3.22573e-07	3.17628e-06	0.000108679	1.6239e-08	2.90876e-07	3.21778e-05	13.4906	8.40295	8.40295	13.4906	13.2882	8.84983	MAISTLLRCLSLLAIVSLAAADSAGKSTDENPGQIRLNCGESGSATDADGRAWAGDAASKFAPSMPDAAAASASYKDPSLPSLVPYTTARVFASSSYTYSFLVRPGRAFLRLYFYPSNYGTHAASDALFGVTAGGVTLLRGFNASQTALALNYAYLVREFSVNVSATGTLNVTFIPSSSSSHYAFINGIEIVPTPDMLTSAAPVVPTLANGARPDPMPIRADTAFQTMYRLNVGGESLSPTDDSARLYRSWDNDAPYIFGAAAGVSYGKDANVTIRYPASVPRYVAPEAVYASARSMGPTAQINLNYNLTWILPVDAGFFYLVRLHFCEIQYPITKVNQRSFDVYISNETAREQMDVIAWSGGIGVPVYTDYLVVTAGSGQMDLWVALHPDVATRPVYY…	receptor-like protein kinase FERONIA-like	Brachypodium distachyon	signal transduction	Y	PM	4020.98	4885.17	2173.47	3038.24	3529.47	37798.3	28054	24503.3	28276.1	29657.9	56163.2	45296.4	46554.7	42444.1	47614.6	56522.3	45071.6	46406.6	39600.9	46900.4	35739.8	20740.1	40875.7	27585.2	31235.2
Bradi5g20890.1	1.72213e-09	6.4532e-08	0.343041	1.23183e-09	5.94746e-13	3.49771e-08	2.5705	1.20246	1.20246	2.45478	2.5705	2.27427	MEPSSSGSAKARRSSSGGSWGSVGGGGADPFDIPAKGAPVERLKKWRQAALVLNASRRFRYTLDLKKEEQKEEVIRKIRAQAHVIRAAFRFKEAARVNDQPKETKASHVDGALGFGIKEDQLTALTRDHNYSALLQYEGISGVASMLKTDTEKGISGDESDLTARQNAFGSNTYPRKKGRSFLAFVWDACKDLTLIILMVAAAVSLALGITTEGIKEGWYDGASIGFAVLLVVFVTATSDYKQSLQFQNLNEEKQNIHLEVVRGGRRIKVSIYDLVVGDVVPLKIGDQVPADGILISGHSFSIDESSMTGESKIVNKDQKSPFLMSGCKVADGYGTMLVTAVGINTEWGLLMASISEDSGEETPLQVRLNGVATFIGMIGLSVAVVVLIVLLARYFTGH…	calcium-transporting ATPase 8, plasma membrane-type-like	Brachypodium distachyon	transporter	Y	PM	616811	520237	636803	480776	563657	708435	709065	547236	746353	677772	1.33488e+06	1.35478e+06	1.39761e+06	1.44734e+06	1.38365e+06	1.24832e+06	1.43636e+06	1.57526e+06	1.53558e+06	1.44888e+06	1.42918e+06	1.16876e+06	1.30853e+06	1.22118e+06	1.28191e+06
Bradi5g23690.1	1.24602e-05	5.1403e-05	0.758351	0.506299	5.68691e-05	0.113737	2.13455	0.749976	0.823124	0.749976	2.13455	1.43226	MAASGALPIVDLAPFFAAGDSAESGNGVARARATEDVREACLATGFFRVVNHGVPRELMARALELSAAFFAIPDDEKAKARSPDASASLPVGYARQPAHSADKNEYLLVFNPGLWLNAYPAEPAGFREALEECYEKLTELGLLIQEILNECMGLPTGFLAGYNGDRSFDFLAALRYFPSSSTEDSNGLSAHEDGNVATFVLQDDVGGLEVLGDDSNGGWILAEPVEGSIVVNVGDVVQVLSNGKFRSATHRVVRKPGLPHRHSLAFFLTVHGDAWVEPLPEFVAGVGQAPRYRGFRYGEYQLLRMRNKTHPPSRPEDVVHITHYAI	1-aminocyclopropane-1-carboxylate oxidase 5-like	Brachypodium distachyon	disease/defence	N	unknown	6809.8	9927.21	7185.6	7629.88	7888.12	7795.73	5639.11	6527.97	6008.81	6492.91	5833.69	5725.05	5080.45	7024.44	5915.91	13668.8	15605.9	15259.5	22816.1	16837.6	12926.9	11859.8	9423.4	10981.3	11297.9
Bradi5g23842.1	2.0192e-06	1.32512e-05	0.967513	0.997168	7.0321e-07	0.98179	2.04867	0.967368	1.0633	0.967368	2.04867	1.05369	MNGYSEIEREKENLINATSISLEQLEKSKNETLYFEKQRAMNQVRQRVFQQAVQGALGTLNSCLNTELHFRTIRANIGILGLSRGCFLFAFTPFRRAAKLNSLLGEGSMTALPIVETQSGDVSAYIPTNVISITDGQIFLSADLFNAGIRPAINVGISVSRVGSAAQIKAMKQVAGKSKLELAQFAELQAFAQFASALDKTSQNQLARGRRLRELLKQSQANPLPVEEQIATIYTGTRGYLDSLEIEQVNKFLGELRKNLKDTKPQFKEIISSSKTFTEQAEILLKEAIQEQLERFSLQEQT	ATP synthase CF1 alpha subunit	Brachypodium distachyon	transporter	Y	PM	48736.8	39390.8	39767.6	53284.8	45295	41174.3	53835.9	52128.8	45510.1	48162.3	44058.9	45773.6	45529.7	39905.6	43817	110279	100885	79432	80581.8	92794.6	40078.4	46025.9	51834.6	52969.3	47727.1
Bradi5g23900.1	0.0104079	0.0161941	0.999996	1	0.0232484	0.0694654	152.923	1.75933	3.25073	1.75933	152.923	125.279	MHAPQRKHRVEVAGRALAVAERDGTHDPATGRALTGSWLWDSALVLASHLAASDHANPILRGATVVELGAGATGLPGIAAVSCLGARRCVLTDAAPALLPGLRANADANGLDAAQADVRELRWGDDLPADRGGLVGQVDVVLMSDVFYDPEEMPALAKTMQALWHWREEEDDGGSIADTVGWAASEARDGVEECVGVLRKEGFEVAEVERVTRPLLRERDPDAGKDAEFVVYRLQLRRPPRGG	methyltransferase-like protein 22-like	Brachypodium distachyon	unclassified	N	cytosol	0	394.752	139.113	65.6093	149.869	209.166	367.928	644.569	727.064	487.182	0.00338825	556.163	481.816	16.6932	263.669	21174.9	16983.7	22141.5	31373.4	22918.4	25276.4	47452.8	326.253	2045.83	18775.3
Bradi5g24690.1	0.000838776	0.00181623	1	0.0183346	0.00100489	0.0895163	1.5254	1.00052	1.00052	1.3601	1.5254	1.26838	MGGLEEIRNEAVDLENIPIEEVFEQLKCTREGLTSDEGAQRVTIFGLNKLEEKKESKVLKFLGFMWNPLSWVMEMAAIMAIALANGEGKPPDWQDFVGIIVLLVINSTISFIEENNAGNAAAALMANLAPKTKVLRDGRWGEQEASILVPGDIVSIKLGDIVPADARLLEGDPLKIDQSGLTGESLPVTKNPGDEVFSGSTCKQGEIEAVVIATGVHTFFGKAAHLVDSTNQVGHFQKVLTAIGNFCIVSIAVGIVIEIIVMFPIQRRKYRAGIENLLVLLIGGIPIAMPTVLSVTMAIGSHKLSQQGAITKRMTAIEELAGMDVLCSDKTGTLTLNKLSVDKNLVEVFAKGVDKEHVLLLAARASRVENQDAIDACMVGMLADPKEARAGIREVHFLP…	Plasma membrane ATPase	Brachypodium distachyon	energy	Y	PM	3.28653e+07	2.44219e+07	3.08076e+07	2.76221e+07	2.89292e+07	3.14151e+07	2.81847e+07	2.68648e+07	2.9312e+07	2.89441e+07	4.13104e+07	4.04405e+07	3.43409e+07	4.1295e+07	3.93467e+07	4.9354e+07	5.17902e+07	4.12857e+07	3.40846e+07	4.41286e+07	4.08611e+07	3.50046e+07	3.71379e+07	3.37694e+07	3.66932e+07
Bradi5g26610.1	5.02508e-08	7.28907e-07	0.00446143	3.38793e-07	1.62891e-08	1.65365e-06	2.52729	1.50506	1.50506	2.11286	2.52729	2.029	MGSASRAVSCLCCPCKCLACGLFSCLCSILVSLLVTAGVLALILYFIFRPHMIAATVDSAALTQFALAPNSALSYNLTVAMTVRNPNKRVGLYYDGVEALALFEGQRFGYAPLDSFSQGTDAVTELKPGFHGQQPVQGDVTAANFRAQQSAGAFDVEVKLNAKLRVKVWAFKVPGPRARISCPISVPAPGNASAPAFQPTGCKVWF	NDR1/HIN1-like protein 2	Brachypodium distachyon	disease/defence	Y	PM	522075	566519	566452	614679	567431	912153	924780	842182	736963	854020	1.13766e+06	1.17881e+06	1.35148e+06	1.12767e+06	1.19891e+06	1.30895e+06	1.5944e+06	1.45789e+06	1.37502e+06	1.43407e+06	1.16747e+06	1.30932e+06	1.14668e+06	981811	1.15132e+06
Bradi5g26740.1	5.42718e-06	2.70157e-05	2.52353e-05	8.02634e-08	0.00028819	0.000373244	9.32198	5.91123	7.34071	9.32198	6.0121	5.91123	MAEEDLTTLTAQLKAAAAAFPSRRAVAVPGKADLTHAALDALVDAAAARLAARAGVRLGHTVALCFPNTVELVIMFLAVIRARAVAAPLNPAYTQEEFEFYLSDSGAGLLLTDLSAANPAAEAAAAKLNLPHSAASLQSSSSPSISLTNLPEDNTTDITAGDEKLLGPNEASDVALFLHTSGTTSRPKGVPLTQRNLAATVRNIRAVYKLTESDATVVVLPLFHVHGLLCSLLSSLASGAAVTLPAGGRFSASTFWANMRGAGATWYTAVPTIHQIILDRHVSRPDPEPLPSLRFIRSCSASLAPAIMSKLETSFKAPVLEAYAMTEASHMMTTNPLPCDGAHKPGSVGLPAGDMELAILSDSGALLPAGTPGEVCIRGANVTAGYSSRTADSTSANAE…	peroxisomal-coenzyme A synthetase-like	Brachypodium distachyon	metabolism	N	chloroplast, apoplast	6430.42	5087.1	6310.51	3257.43	5271.36	52066.4	42391.7	25816.5	34507.5	38695.5	48592.7	53912.2	44441.9	49611.4	49139.6	43044.2	33941.8	20604.9	29177	31692	28374.6	26148.7	34822.3	35295.4	31160.2
Bradi5g27260.1	2.48896e-06	1.54776e-05	0.998087	0.996828	1.54467e-05	0.000129541	1.80972	0.973081	0.973081	1.03071	1.80972	1.69777	MHAKTDSEVTSLAPSSPPRSPGRANGTTTNNNGSGNNTGGGVMRGAVYYVQSPSRDSHDGETKTATSVHSTPALSPMASPRHSHSSVGRDSSSSRFSRGHHKDKSAGRKGAPAGKGWQEIGVIEEEGLLDDEDERRPMPKRCKYCLIFVGGFVVLFSFFALVLWGASRSQKPQIAMKSITFENFIIQAGTDASLVPTDMATTNATVKFTYKNTGTFFGIHVAADPFTLSYSQLNLASGDLKKFYQGRSGRRTVSVSVTGNKVPLYGSGPTLMAAPAGAKGAAPGKVAAVPMILRTTVRSRAYVLGALVKPRFTKEIECRVVMNPAKLNKPISLAKACQYY	LEA_2 domain-containing protein	Brachypodium distachyon	unclassified	Y	PM	32260.2	29394.7	26053	32125.8	29958.4	30200.6	31394	30287.8	24725.5	29152	31443.5	28309.3	29987.7	33772.7	30878.3	50581.3	43972.6	63481.2	58830.1	54216.3	51846.2	43599.4	57465	50539.3	50862.5
